# Supplementary material for: Loss of β‐Actin Leads to Accelerated Mineralization and Dysregulation of Osteoblast‐Differentiation Genes during Osteogenic Reprogramming
Source: PubMed Central journal article supplement (PMC7709978; doi:10.1002/advs.202002261), 2020-10-27
Supplement: ADVS-7-2002261-s001.pdf [file ADVS-7-2002261-s001.pdf]

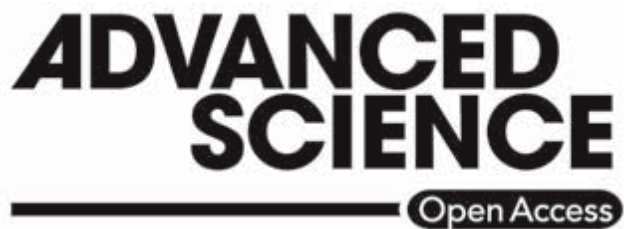

## Supporting Information

for *Adv. Sci.*, DOI: 10.1002/advs.202002261

Loss of  $\beta$ -actin Leads to Accelerated Mineralization and Dysregulation of Osteoblast-differentiation Genes during Osteogenic Reprogramming

<sup>1,\*</sup>Tamara Gjorgjieva, <sup>1,2\*</sup>Xin Xie, <sup>3</sup>Patrick Commins, <sup>4</sup>Renu Pasricha, <sup>1,5</sup>S. Raza Mahmood, <sup>2,5</sup>Kristin C. Gunsalus, <sup>3</sup>Pance Naumov and <sup>1,6</sup>Piergiorgio Percipalle

## Supplementary Information

### **Loss of $\beta$ -actin leads to accelerated mineralization and dysregulation of osteoblast-differentiation genes during osteogenic reprogramming**

<sup>1,\*</sup>Tamara Gjorgjieva, <sup>1,2\*</sup>Xin Xie, <sup>3</sup>Patrick Commins, <sup>4</sup>Renu Pasricha, <sup>1,5</sup>S. Raza Mahmood, <sup>2,5</sup>Kristin C. Gunsalus, <sup>3</sup>Pance Naumov and <sup>1,6</sup>Piergiorgio Percipalle

<sup>1</sup>Science Division, Biology Program, New York University Abu Dhabi (NYUAD), P.O. Box 129188, Abu Dhabi, United Arab Emirates; <sup>2</sup>Center for Genomics and Systems Biology, New York University Abu Dhabi (NYUAD), P.O. Box 129188, Abu Dhabi, United Arab Emirates; <sup>3</sup>Science Division, Chemistry Program, New York University Abu Dhabi (NYUAD), P.O. Box 129188, Abu Dhabi, United Arab Emirates; <sup>4</sup>Core Technology Platforms, New York University Abu Dhabi (NYUAD), P.O. Box 129188, Abu Dhabi, United Arab Emirates; <sup>5</sup>Department of Biology, New York University, New York, NY, 10003, USA, <sup>6</sup>Department of Molecular Biosciences, The Wenner-Gren Institute, Stockholm University, SE-106 91 Stockholm, Sweden

\* Equal contribution

<sup>6</sup> Correspondence: Piergiorgio Percipalle, address as above

Tel.: +97126284389

Email: pp69@nyu.edu

Running title:  $\beta$ -actin loss dysregulates osteogenic reprogramming

Keywords:  $\beta$ -actin, actin cytoskeleton, osteogenic reprogramming, mineralization, mitochondria

## Contents

|      |                         |       |
|------|-------------------------|-------|
| I.   | Experimental procedures | 3-6   |
| II.  | References              | 7     |
| III. | Supplementary Figures   | 8-18  |
| IV.  | Supplementary Tables    | 19-81 |

## I. Experimental procedures

**Antibodies and chemicals.** Anti-H3K9Me3 antibody (ab8898) is from Abcam. CHIR99021 (SML1046) and Forskolin (F3917) are from Sigma-Aldrich. Anti-Brg1 antibody is from Dr. Anki Östlund-Farrants Lab (Department of Molecular Biosciences, University of Stockholm, Sweden). RevertAid First Strand cDNA Synthesis Kit (K1622) is from Thermo Fisher Scientific. Dexamethasone (1126) is from Tocris Bioscience. Alizarin Red Staining Solution (TMS-008-C) is from EMD Millipore.

**Cell culture for MEF.** The mouse embryonic fibroblasts (MEFs) WTM, HETM and KOM (from the lab of Dr. Christophe Ampe, University of Gent, Belgium) were maintained and cultured with Dulbecco's modified Eagle medium (DMEM) with high glucose, 10% fetal bovine serum (FBS) and 100 units/mL penicillin and 100 µg/mL streptomycin, in a humidified incubator with 5% CO<sub>2</sub> at 37<sup>0</sup>C. Cells were imaged at day 0, 4, 8 and 14 using the EVOS cell imaging system (Thermo Fisher Scientific).

**Osteogenic reprogramming protocol with small chemical molecules.** OsteoMax-XF differentiation medium (EMD Millipore) was used as the osteogenesis induction medium, with the following supplements: GlutaMAX (1X), penicillin-streptomycin (100 µg/ml), Non-essential Amino Acid (1X) and Trace element B (1X). In addition, small chemical molecules were dissolved and diluted in DMSO and used at the following final concentrations: Dexamethasone (Dex) - 5 mM, Forskolin (F) - 5mM; Chir - 50mM. MEFs were seeded to a Matrigel-coated plate (1:30 dilution in pre-cold PBS, coated overnight at 40<sup>0</sup>C, at a density of 10,000 cells/well in a 96-well plate, 60,000 cells/well in a 24-well plate and 500,000 cells/well in a 6-well plate. The MEFs were cultured in DMEM medium until confluent. Once confluent, the DMEM was replaced with an osteo induction medium containing the small molecules; this is considered day 0. The osteo medium was then changed every two days for 14 days.

**Alizarin Red staining.** Cells in a 96-well-plate were fixed with 3.7% formaldehyde for 5 minutes, washed twice with Milli Q water and incubated with 80µl Alizarin Red stain solution (EMD Millipore) with light shaking at room temperature for 20 minutes. The stain was then removed, cells were washed 3 times with Milli Q water and the wells were imaged with Leica DMI6000 DIC/Fluorescence Inverted Microscope.

**Quantitative real time qPCR.** Total RNA was extracted using RNeasy Mini Kit (Qiagen) according to the manufacturer's instruction. 200 ng to 1 µg total RNA was reverse transcribed to cDNA using RevertAid First Strand cDNA synthesis Kit (Thermo Fisher Scientific). Diluted cDNA was subjected to quantitative real-time PCR analysis using Maxima SYBR Green qPCR Mix (Thermo Fisher Scientific) on Stratagene 3005 qPCR system (Agilent Technology). All expression levels of target genes were normalized to the expression of Nono reference gene. Data is a summary of 3 biological replicates and 4 technical replicates for each condition. The primers used for qPCR analysis are as follows:

Table S4: Primers for qPCR

| Gene         | Forward                 | Reverse                |
|--------------|-------------------------|------------------------|
| <i>Runx2</i> | TTCAACGATCTGAGATTTGTGGG | GGATGAGGAATGCGCCCTA    |
| <i>Bglap</i> | TCTGCTCACTCTGCTGACCC    | CGCCGGAGTCTGTTCCTACTAC |
| <i>ALPL</i>  | CCAACTCTTTTGTGCCAGAGA   | GGCTACATTGGTGTGAGCTTTT |

|              |                       |                         |
|--------------|-----------------------|-------------------------|
| <i>Spp1</i>  | AGCAAGAACTCTTCCAAGCAA | GTGAGATTCGTCAGATTCATCCG |
| <i>Fgf23</i> | ATGCTAGGGACCTGCCTTAGA | AGCCAAGCAATGGGGAAGTG    |
| <i>Sost</i>  | AGCCTTCAGGAATGATGCCAC | CTTTGGCGTCATAGGGATGGT   |
| <i>DMP1</i>  | CACGGACAGCAGTGAATCTGG | GCCGGTCCCCGTACTCTTA     |

**Scanning Electron Microscopy (SEM) and Energy-Dispersive X-ray (EDX) spectroscopy.** Cells were washed with PBS, fixed with 3.7% formaldehyde for 5 minutes, and collected by being scraped from the well-plate surface. Upon collection, the cells were centrifuged and the supernatant was discarded. The pellet was then dissolved in ethanol, passed through a 200 nm filter, and eluted with ethanol. 5µl of the sample in ethanol was drop cast onto a metal plate and subjected to SEM analysis. Because of the inorganic nature of the hydroxyapatite crystals, we expected it to not dissolve in ethanol and remain intact for SEM imaging and EDX mapping. The SEM images were obtained using high-vacuum mode on a FEI Quanta 450 Field Emission scanning electron microscope with a primary electron energy of 5–10 kV and spot size of 2.5–3. The EDX experiments were performed by first focusing onto the surface of a single particle and by using an accelerating voltage of 15 keV. The emitted X-rays were monitored until a significant amount of counts were observed (~500 counts/s).

**Transmission Electron Microscopy (TEM): sample preparation.** 1,000,000 MEF cells were cultured in DMEM medium at a density of 500,000 cells/well in a 6-well plate. Once confluent (70-80%), the DMEM was replaced with an osteo induction medium (OsteoMax + Dex/F). The cells were washed twice with PBS, trypsinized and collected on day 2, and spun at low speed to form a pellet. High pressure freezing was performed using the Leica ICE high-pressure freezer apparatus with a gold-plated specimen carrier (carrier A, 3mm diameter, 100 µm deep and carrier B with flat side down). Specimen carriers were lightly coated with 0.1 % soy lecithin in chloroform to ensure the opening of the carrier sets and air dried.

Carrier A was filled with pelleted cells and carrier B was placed on top with flat side down before freezing at a programmed pressure of 2100 bars. After freezing, the sample pod was released automatically into a liquid nitrogen bath; the sample carrier was then separated from the specimen pod using precooled fine-tipped tweezers under liquid nitrogen and transferred for Leica freeze substitution AFS2 set up in 2 mL solution of cold dry absolute acetone (v/v) containing 1% osmium tetroxide. The AFS unit was slowly warmed from -90°C to 0°C (2°C/h), with the temperature being held at both -90°C for a period of 15 hrs and thereafter at -60°C and -30°C for a period of 8 h each. Samples were cleared of osmium by rinsing with absolute acetone (3 times × 5 mins) and infiltrated with Epon resin in increasing conc (30%, 66% and 100 %) for 4h each and 100% overnight. Individual samples were embedded in 1 mL for 24-30 h at 60°C. The resin blocks were sectioned using Leica ultramicrotome (UC7) using a diamond knife to get 60nm thick sections and mounted on carbon coated 200 mesh copper grids.

**TEM imaging.** High resolution transmission electron microscopy (HRTEM) images were obtained using a Talos F200X Scanning/Transmission Electron Microscope with a lattice-fringe resolution of 0.14 nm at an accelerating voltage of 200 kV equipped with a CETA 16M camera. All the relevant areas were marked using bright field imaging mode at spot size 5 and later scanned using the STEM-HDAAF mode. The STEM mode helps in providing the elemental composition as it works on the principle of mass determination. Such measurements can be performed at low electron dose by collecting the high-angle dark-field signal using an annular detector. The annular dark-field signal can also be used to image the elements that have different masses, with the heavier mass element appearing brighter. The STEM

technique has been widely used for visualizing single atoms of high atomic number elements supported on a lower atomic number matrix<sup>[1]</sup>. STEM imaging of ultrasmall clusters of heavy atoms affords the necessary contrast and Signal to noise ratio for visualization at electron doses that are compatible with biological specimens. In one important application, ultrasmall clusters are used for site-specific labeling of supramolecular assemblies to identify precisely the location of specific subunits within these assemblies<sup>[2]</sup>. The samples were scanned at spot size 9 and with screen current of 60 pA. The data was analysed using Velox analytical software.

**RNA-seq for MEF.** The RNA-Seq data for wild-type (WT)  $\beta$ -actin +/+ MEF, heterozygous (HET)  $\beta$ -actin +/- MEF and knock-out (KO)  $\beta$ -actin -/- MEF is previously reported in Xie et. al., 2018, and deposited under the GEO accession number GSE95830<sup>[3]</sup>. While there were 4 samples for WT, HET and KO MEF cells submitted for RNA-seq analysis, one of the KO samples was of insufficient quality to pass RNA-seq quality control (QC) and was therefore removed from further analysis.

**RNA-Seq for reprogrammed osteoblasts: sample prep and sequencing.** Three biological replicates of each cell type (WT, HET and KO) were collected on day 4 and 14. Total RNA was extracted and purified using RNeasy Mini Kit (Qiagen, 74106) according to the manufacturer's instruction. RNA-sequencing libraries were constructed using TruSeq RNA Library Prep Kit v2 (Illumina, RS-122-2002) according to the manufacturer's instruction. Briefly, at least 100 ng total RNA was mixed with magnetic Oligo-dT beads to purify the mRNA. The purified mRNA on beads were fragmented and primed. The first strand and second strand cDNA synthesis was performed using SuperScript Double-Stranded cDNA synthesis kit (Invitrogen, 11917020). The synthesized dsDNA was then purified using AMPure XP Beads (Beckman Coulter, A63881). After purification, the DNA sample was end-repaired and adenylated at the 3' end, followed by adaptor ligation. The cDNA was further amplified with index primers using the following protocol: 98<sup>o</sup>C for 30 Sec; 15 cycles of: 98<sup>o</sup>C for 10 Sec, 60<sup>o</sup>C for 30 Sec, and 72<sup>o</sup>C for 30 Sec; 72<sup>o</sup>C for 5 Min. The PCR product was purified using AMPure XP Beads and the library quality and size was analyzed using 2100 Bioanalyzer (Agilent Genomics). Libraries with compatible index primers were pooled at equal amount and the deep-sequencing was performed using Illumina HiSeq 2500 sequencing platform at New York University Abu Dhabi Sequencing Center.

## Statistical Analysis

### A. T-tests for pairwise comparisons

Two-sample Welch t-test was performed to compute the significance in pair-wise comparisons on the qPCR data in Figure 1C and Figure S2D. In all cases, significance was defined as  $p \leq 0.05$ . Statistical analysis was carried out using Prism GraphPad. Matched-pair t-test was performed to compute the significance in pair-wise comparisons on gene expression data for mitochondrial and oxidative phosphorylation genes in Figure 2L-M. In all cases, significance was defined as  $p \leq 0.05$ . Statistical analysis was carried out using R and associated packages.

### B. RNA-seq analysis

Briefly, raw read alignment was performed using tophat2 v2 1.0; the parameters used to specify the genome file were “-no-novel-junctions” and “-G”. Mus musculus GRCm38.p4 was used as the reference genome and for GFF annotation. Following the tophat2 alignment, read counts mapped to each gene were generated using HTseq count. Variance stabilizing transformation (VST) was performed to normalize the data using NASQAR<sup>[4]</sup>. Differential expression (DE) analysis was performed using the DESeq2 R package on all 46,602 genes<sup>[5]</sup>, based on the negative binomial distribution using the following steps: estimation of size factors, estimation of dispersion, negative binomial GLM (general linear model) fitting and Wald statistics. All DE analysis, significance was defined as Benjamini-Hochberg adjusted p-value < 0.05.

For mitochondria and OXPHOS analyses, genes with p-val adjusted < 0.05 were selected as significant. For OBD, Wnt and Bmp analyses, genes with p-val adjusted < 0.05 and  $|\log_2(\text{fold change})| > 1$  were selected as significant. For some analyses, genes were subset based on GO terms: mitochondria (GO: 0005739, n=1845), OXPHOS (GO:0006119, n=108), OBD (GO:0001649, n=203), positive regulation of OBD (GO:0045669, 70 genes), negative regulation of OBD (GO:0045668, n=64), Wnt (GO:0016055, n=444) and BMP signaling pathway (GO:0030509, n=171).

### C. Z-score normalization

Z-score normalization was performed in R. First, mean and standard deviation of expression values were computed for every gene. Expression values for each condition and for each gene were normalized using the z-score method to center the data:  $z = \frac{x - \text{mean}(x)}{s.d.(x)}$ , where x is a vector of mean gene expression in all conditions (WTM, WT4, WT14, KOM, KO4, KO14) for a single gene.

### D. Violin plots

Violin plots in Figure 2L-M were produced using z-score normalized data of significantly DE mitochondrial genes (n=1136) and oxidative phosphorylation genes (n=68) using R and the ggplot package. Significance of pairwise comparisons between two conditions was determined using two-tailed matched-pairs t-test.

### E. Hierarchical clustering

Hierarchical clustering was performed on z-score normalized gene expression data. Agglomerate coefficients were calculated for 4 different linkage methods for each dataset to determine the one that captures the maximum structure of the data (Table S5). For each dataset, the euclidean distance matrix was calculated, Ward.D 2 linkage clustering was computed, and dendrograms were constructed. The number of clusters was determined using Silhouette plots; for most analyses where the optimal value was too low ( $k < 3$ ), the next best optimal value was used in order to obtain a more granular clustering of the data. Heatmaps were then generated based on hierarchical Ward.D2 clustering and using the sub-optimal number of gene clusters. Statistical analysis was carried out using R and associated packages.

Table S5. Agglomerate coefficients of different linkage methods for each dataset

|          | OBD       | Wnt       | Bmp       |
|----------|-----------|-----------|-----------|
| average  | 0.6449310 | 0.6915657 | 0.6065164 |
| single   | 0.4541151 | 0.5132266 | 0.4737116 |
| complete | 0.7259239 | 0.7584354 | 0.6810116 |
| ward     | 0.9190068 | 0.9451137 | 0.8858413 |

### F. Gene Ontology (GO) enrichment analysis

Differentially expressed genes were selected for enrichment analysis by comparing two different conditions. Gene ontology (GO) analysis was performed using the Web-based DAVID bioinformatics resources <sup>[6]</sup>. For the GO terms to be considered over-represented or enriched in each gene list, the following criteria was applied: 1- the test p-value is less than 0.05 for the

enrichment, 2- fold of enrichment (observed number of genes in the term/expected number of genes in the term) is  $\geq 2$  (Table S1D) or  $\geq 1.5$  (Table S2B-C).

## II. Supplementary references

- [1] A. V. Crewe, J. Wall, J. Langmore, *Science* **1970**, 168, 1338.
- [2] J. F. Hainfeld, R. D. Powell, *Journal of Histochemistry & Cytochemistry* **2000**, 48, 471.
- [3] X. Xie, B. Almuzzaini, N. Drou, S. Kremb, A. Yousif, A., A. K. Östlund-Farrants,..... P. Percipalle, *FASEB J* **2018**, 32, 1296.
- [4] A. Yousif, N. Drou, J. Rowe, M. Khalfan, K. C. Gunsalus, *bioRxiv* **2019**, 709980.
- [5] M. I. Love, W. Huber, S. Anders, S, *Genome Biology* **2014**, 15, 550.
- [6] D. W. Huang, B. T. Sherman, Q. Tan, J. Kir, D. Liu, D. Bryant, ... R. A. Lempicki, *Nucleic Acids Res.* **2007**, 35(suppl\_2), W169-W175.



### III. Supplementary Figures

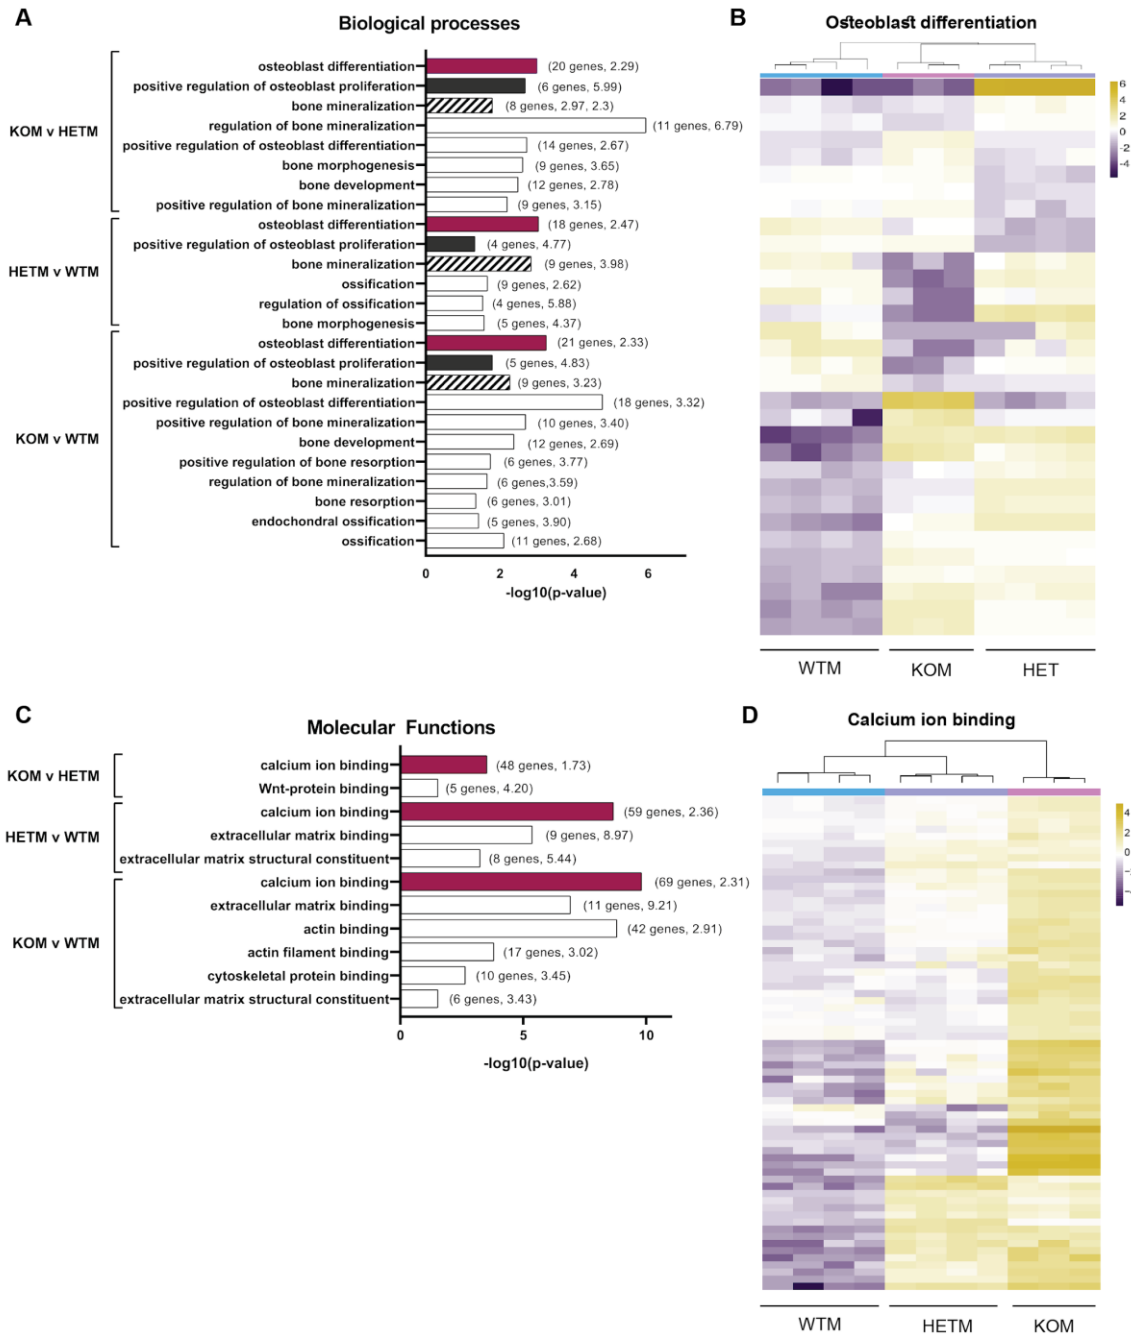

**Figure S1. Genes related to osteogenesis and calcium homeostasis are dysregulated in WT, HET and KO MEF cells.** (A,C) In each two-way comparison (WTM/HETM, HETM/KOM, WTM/KOM), genes that were differentially expressed (FDR-adjusted p-value < 0.05, |fold change|>2) were subjected to GO enrichment analysis. The statistically significant GO terms (p-value < 0.05, fold of enrichment  $\geq 2$ ) are presented for biological processes (A) and molecular function (B). The GO terms shared by all 3 pairwise comparisons are highlighted. (B,D) Differentially expressed genes across the three pairwise comparisons for specific GO terms were pooled together. The list of unique genes was subjected to heatmap clustering for osteoblast differentiation (B) and calcium-ion binding (D). Clustering is based on the covariance of gene expression. Scale bar:  $\log_2$ CPM.

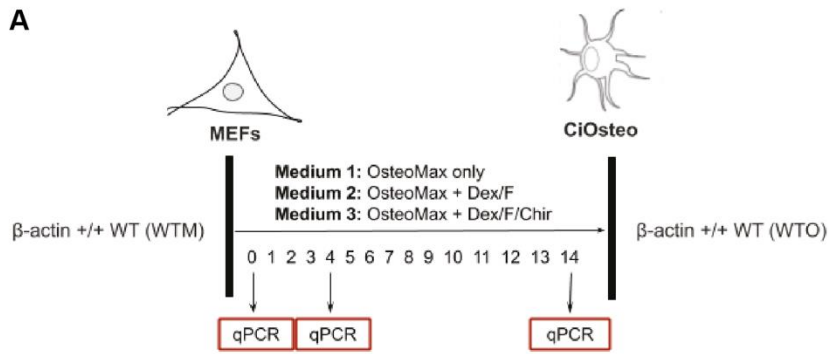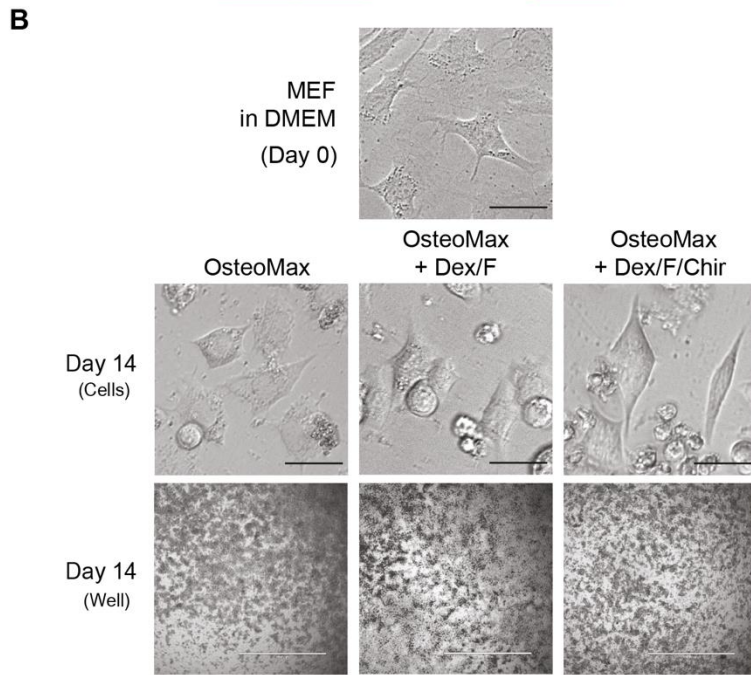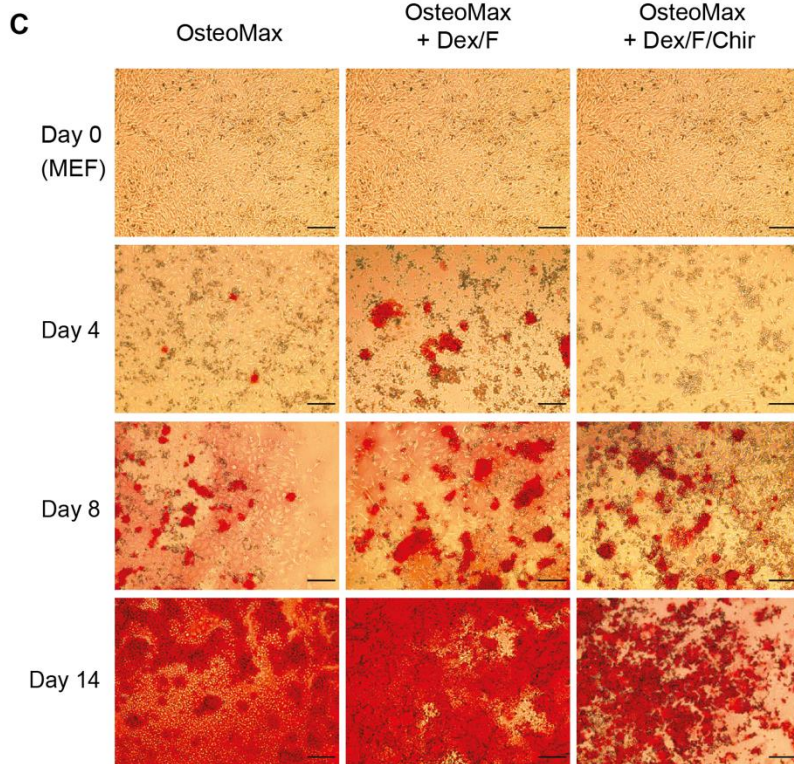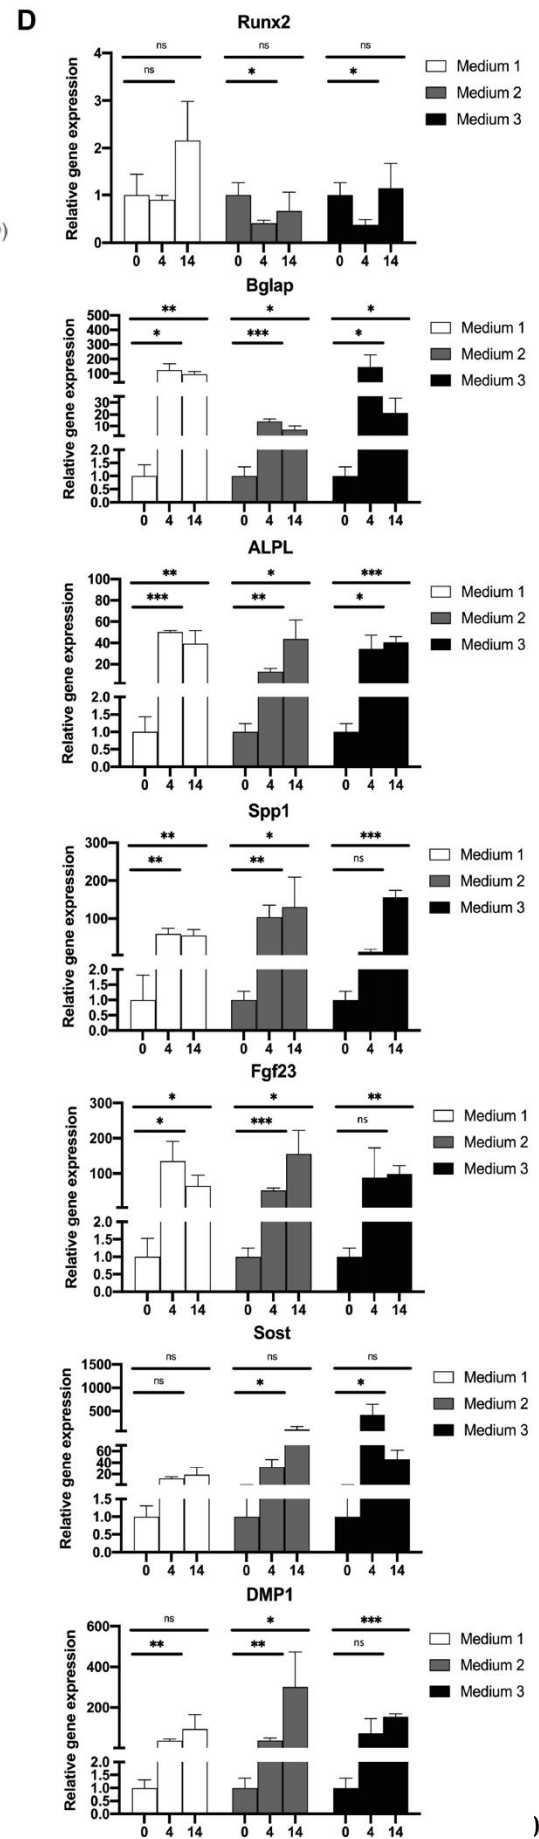

**Figure S2: Direct reprogramming WT MEF (WTM) to osteoblast-like cells (WTO) with small molecules.** (A) Diagram of the experimental setup for direct reprogramming of WTM to WTO using three different mediums composed of OsteoMax medium and cocktails of small molecules: OsteoMAX-XF™ medium only, OsteoMAX-XF™ medium + Dex/F, OsteoMAX-XF™ medium + Dex/F/Chir. Morphology (B), calcium-based mineralization of the ECM by Alizarin Red staining (C) and the expression of osteoblast biomarkers by qPCR (D) was monitored over 14 days. Addition of Chir produced more elongated cells and reduced mineralization at day 14 (Fig S2B-C), and the OsteoMAX-XF™ + Dex/F medium resulted in strongest mineralization at day 14 (Fig S2C). All media induced the RNA expression of bone matrix proteins such as osteocalcin (Bglap) and osteopontin (Spp1), but none induced Runx2 expression (Fig S2D) suggesting possible differences between the small molecules-driven reprogramming and Runx2-dependent osteoblast differentiation in vivo. Notwithstanding, the OsteoMAX-XF™ + Dex/F medium showed effective induction of a functional osteoblastic phenotype with mineralized extracellular matrix at day 14 in WT cells, which was used for all subsequent experiments. (B) Cell morphology of WT cells as MEF (in DMEM) and at day 14 (in different reprogramming media). Scale bars: 30µm (row 1 and 2), 100µm (row 3). (C) Alizarin Red staining for calcium mineralization in WT cells at day 0 (MEF), 4, 8, and 14. Scale: 100µm. (D) Quantification of relative gene expression of key osteogenic biomarkers in MEF. qPCR was performed in MEFs and CiOsteo cells at day 4 and 14, using the three mediums. The *Nono* housekeeping gene was used for normalization, and the expression level of WTM was set to 1 for each gene, and each medium. Data is a summary of 3 biological replicates of reprogrammed cells. Data presented as mean and S.D. P-values are calculated using Welch t-test, \*P<0.05, \*\*P<0.01, \*\*\*P<0.001, (ns) P>0.5.

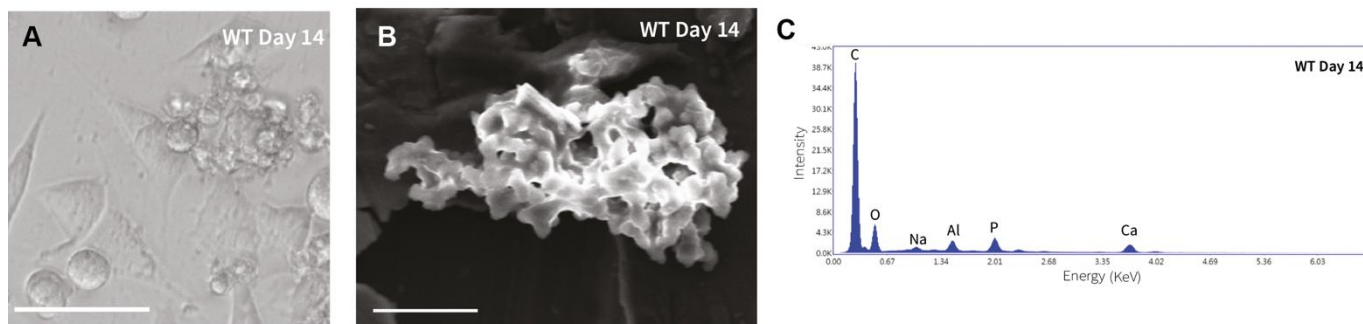

**Figure S3. WT cells at day 14 exhibit irregular structures that contain all elements of hydroxyapatite.** (A) Microscopy images of alive WT cells at day 14. Scale bar: 50µm (B) Scanning Electron Microscopy (SEM) image of the inorganic extracellular components in WT cells at day 14. Scale bar: 10µm (C) Energy-dispersive X-ray (EDX) spectra identifies all elements of hydroxyapatite (Ca, C, P and O) on the sample surface in both WT and KO cells. Na, Mg, Al and Si are trace elements from the SEM plate on which the sample was deposited.

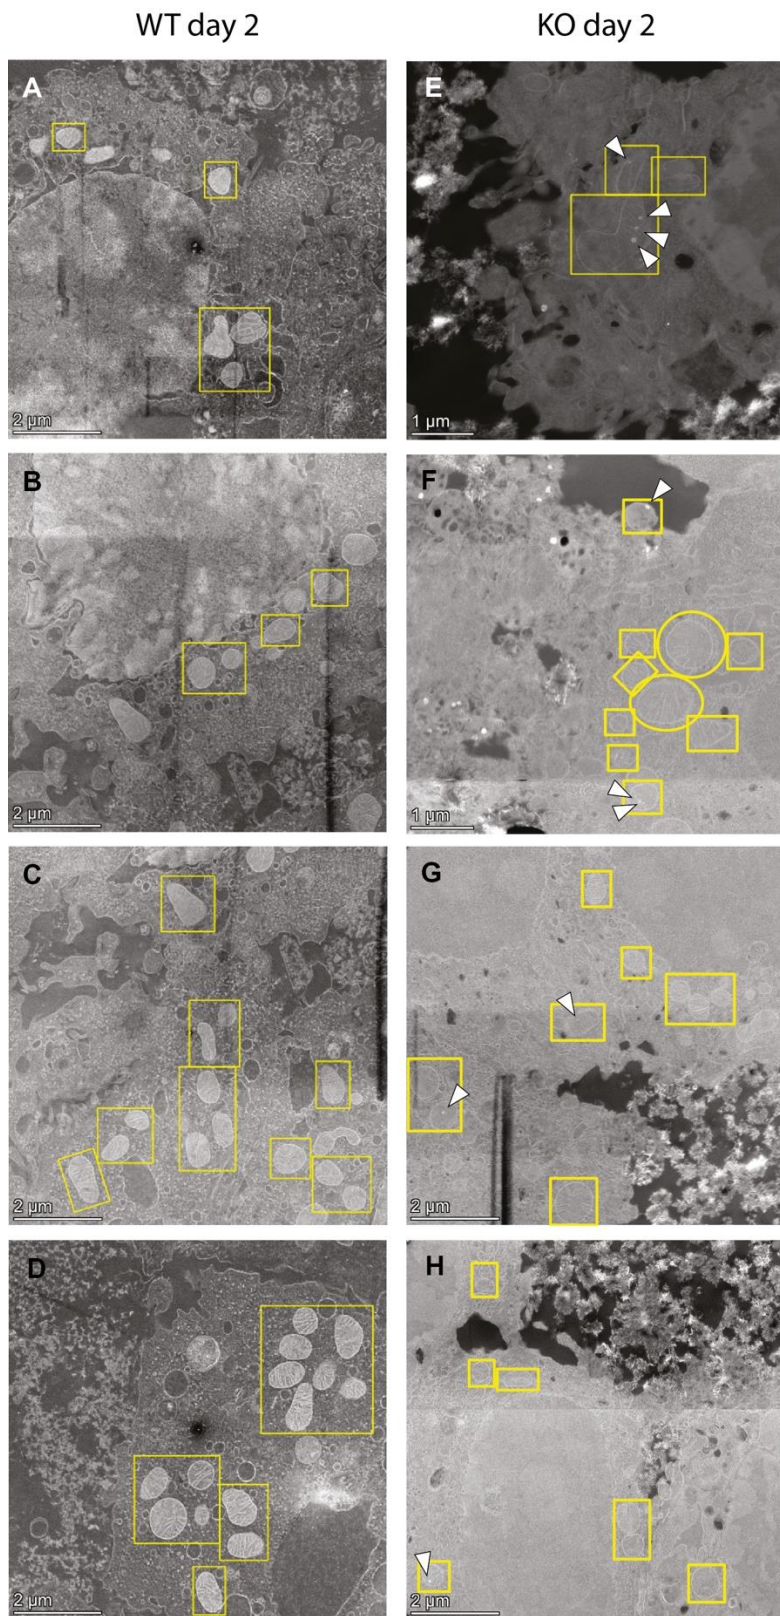

**Figure S4. TEM images of mitochondria in WT and KO cells at day 2.** (A-D) WT cells at day 2 (WT2) show no intramitochondrial granules. (E-H) KO cells at day 2 (KO2) show some intramitochondrial granules (white arrowheads). All mitochondria that were counted for the analysis are highlighted in yellow.

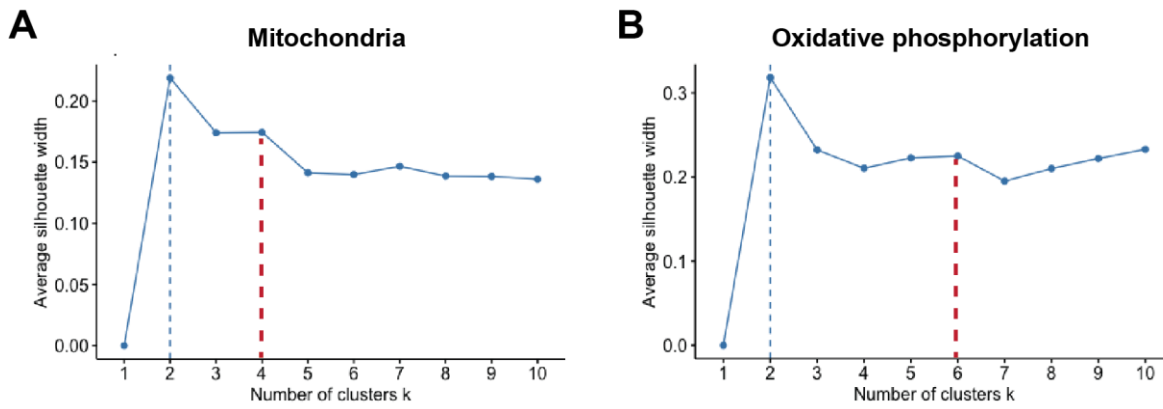

**Figure S5. Silhouette plots to determine the optimal number of clusters (k) used in analysis of mitochondria and oxidative phosphorylation (OXPHOS) genes. (A)** Optimal k for mitochondria-related genes. K=4 was selected as a sub-optimal cluster to compromise between the determined k=2 optimal clusters and enhancing the granularity of clustering analysis. **(B)** Optimal k for OXPHOS-related genes. K=6 was selected as a sub-optimal cluster to compromise between the determined k=2 optimal clusters and enhancing the granularity of clustering analysis.

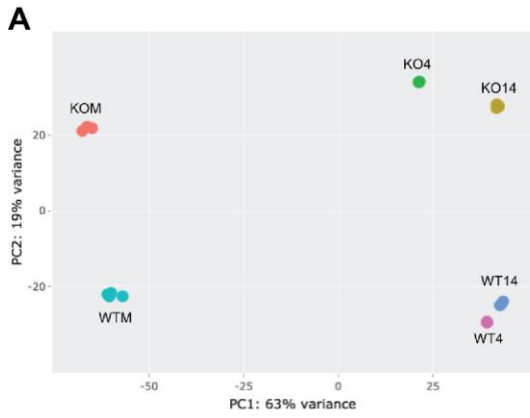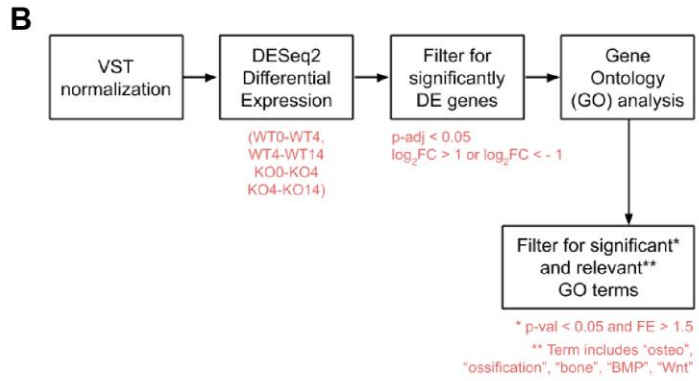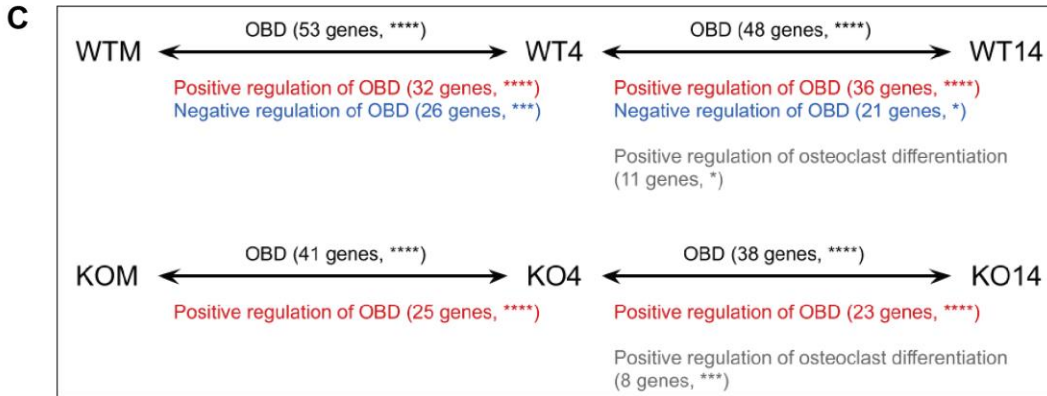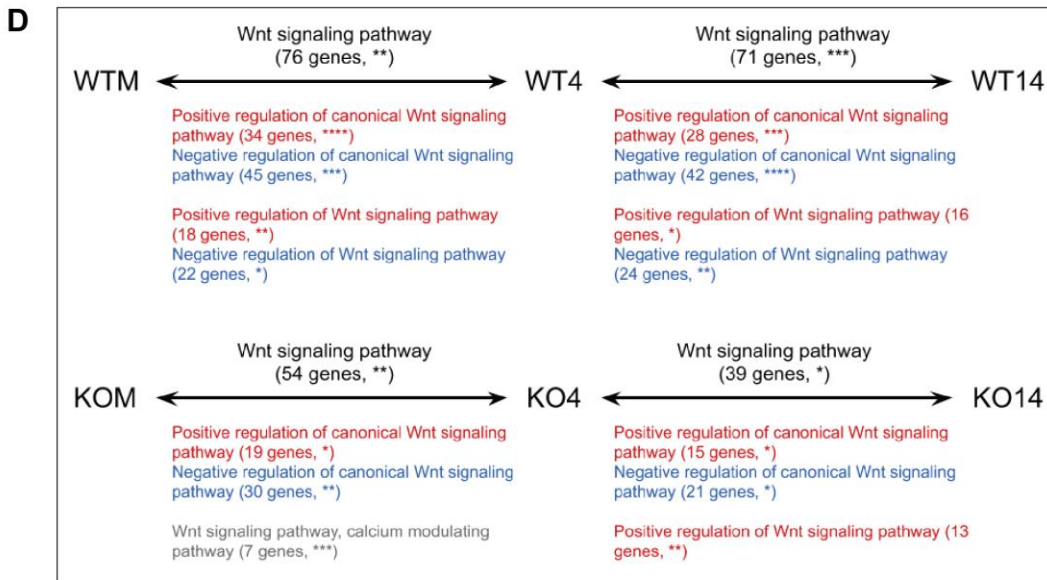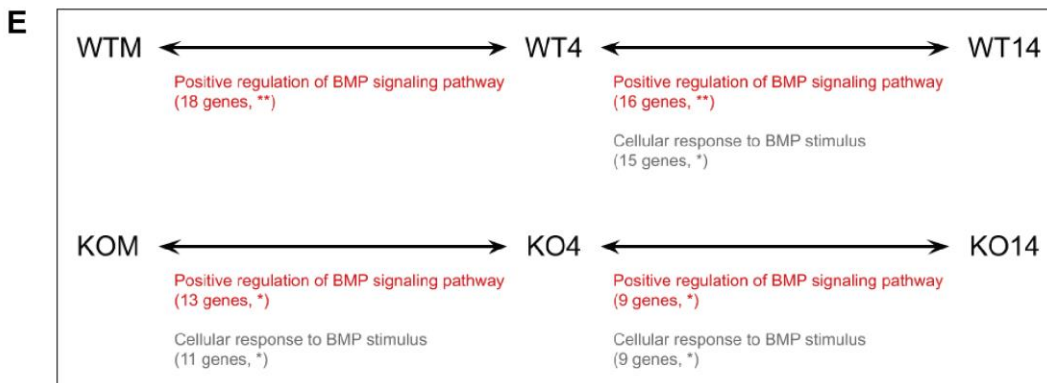

**Figure S6. Exploratory RNA-seq DE analysis on osteogenesis-related genes.** (A) Principal Component Analysis (PCA) shows clear separation of MEFs and osteoblast-like cells (PC1, 63% variance), as well as of WT and KO (PC2, 19% variance), resulting in 6 distinct clusters for the 6 conditions. (B) Analytical pipeline for RNA-seq data normalization, differential expression and gene ontology (GO) enrichment analysis. Summary of all resulting data is provided in Table S2B-C. (C-E) Summary of GO analysis focusing on osteoblast-differentiation (OBD)-related genes (C), Wnt signaling-related genes (D) and BMP signaling-related genes (E), including the parent GO term (black), positive regulation GO terms (red), negative regulation GO terms (blue) and other relevant GO terms (grey). Numbers in parentheses reflect number of genes, and significance of GO term: \*P<0.05, \*\*P<0.01, \*\*\*P<0.001, \*\*\*\*P<0.0001, (ns) P>0.05.



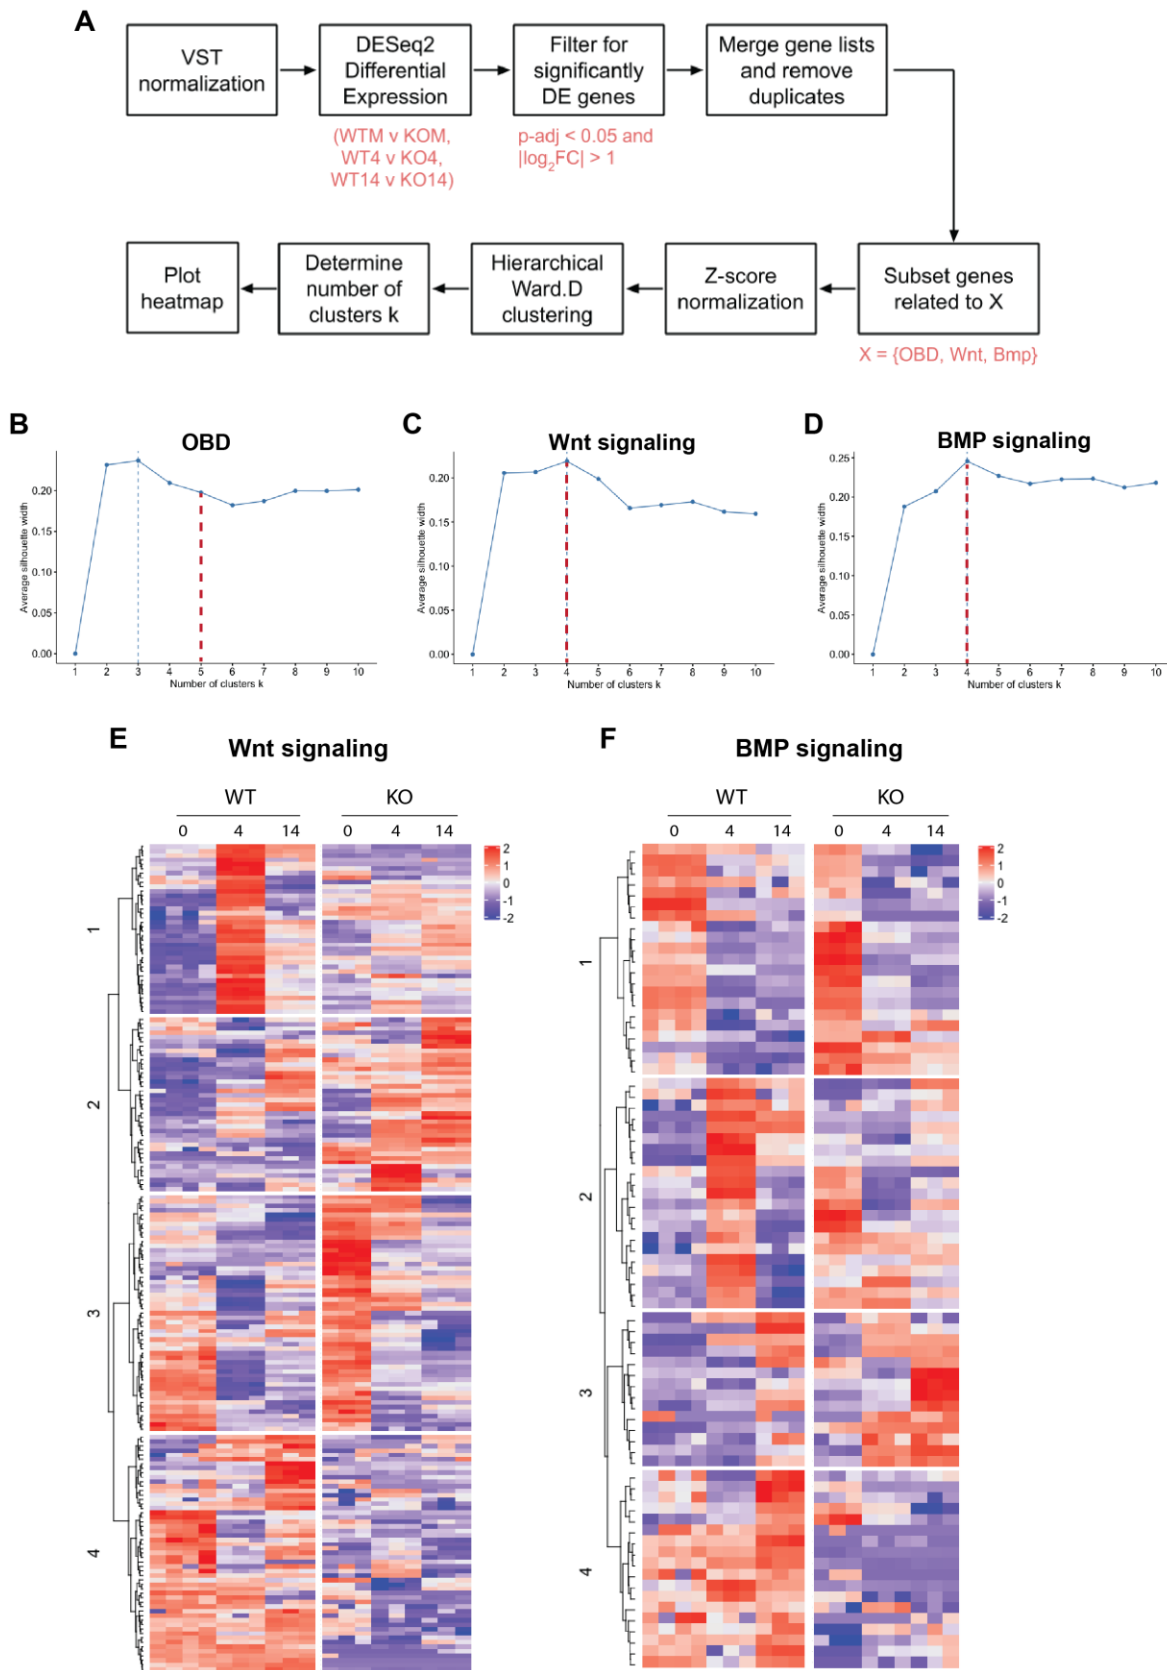

**Figure S7. OBD, Wnt and Bmp signaling pathways in reprogrammed WT and KO cells. (A)** Analytical pipeline for RNA-seq normalization, DESeq2 DE, Z-score normalization and hierarchical

clustering. **(B-D)** Silhouette plots for determining optimal and sub-optimal number of clusters (k) for OBD (B), Wnt (C) and BMP-related genes (D). The sub-optimal cluster number was selected for each dataset (k=5, k=4 and k=4, for OBD, Wnt and BMP, respectively). **(E-F)** Heatmaps of genes that are significantly DE (p-val < 0.05, and |fold change| > 2) in at least one pair-wise comparison (WTM v KOM, WT4 v KO4, WT14 v KO14) that belong to the Wnt or BMP GO terms. Heatmap shows z-score normalized expression data and reveals distinctive temporal patterns of expression in WT and KO cells at days 0, 4 and 14. Hierarchical clustering was done using Ward.D linkage; k=4 for both Wnt and BMP signaling heatmaps was determined per above.

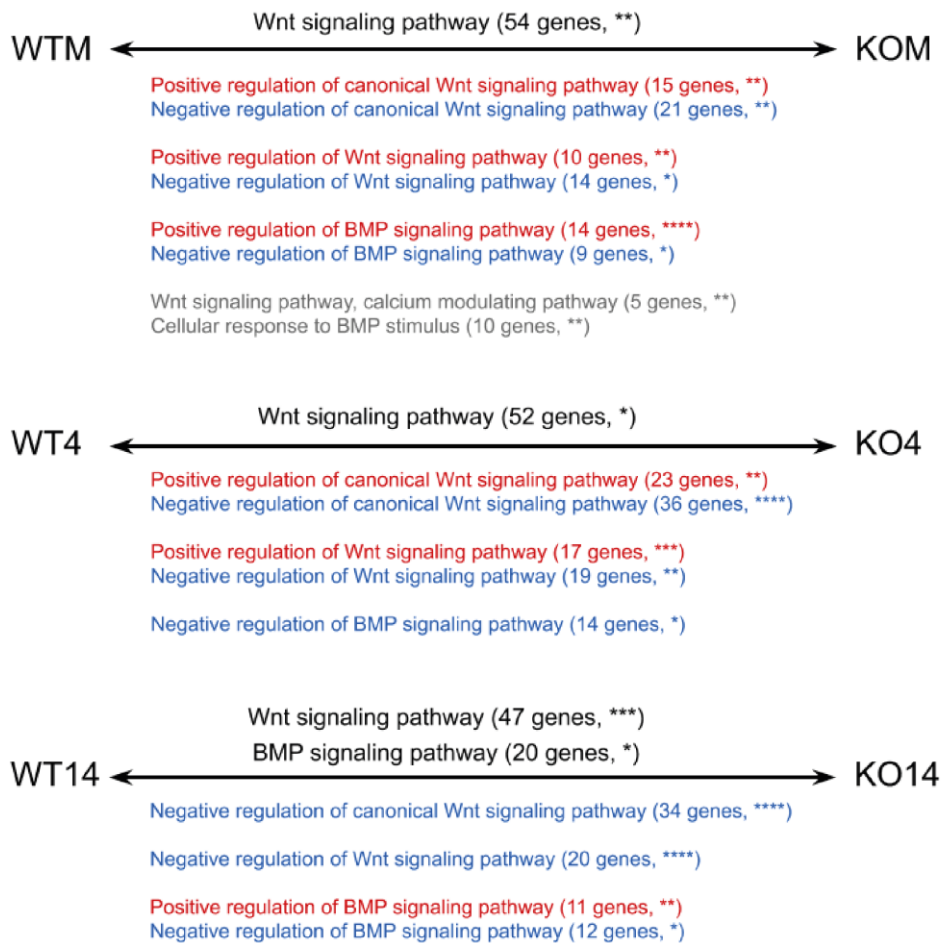

**Figure S8. Analysis of differential expression of Wnt and BMP signaling pathways between WT and KO cells.** Summary of GO analysis on DE genes (p-adjusted < 0.05, |fold change| > 2) between WT and KO at different timepoints: WTM v KOM, WT4 v KO4, WT14 v KO14, including parent GO term (black), positive regulation GO terms (red), negative regulation GO terms (blue) and other relevant GO terms (grey). Numbers in parentheses reflect number of genes, and significance of GO term: \*P<0.05, \*\*P<0.01, \*\*\*P<0.001, \*\*\*\*P<0.0001, (ns) P>0.05.

#### IV. Supplementary Tables

**Table S1. Mitochondria and OXPHOS genes used in analyses**

A. 1136 mitochondria-related genes that are DE ( $p\text{-adj} < 0.05$ ) between WT4 and KO4 cells.

| gene.ids           | gene.name | WT4 vs KO4 |            | Cluster |
|--------------------|-----------|------------|------------|---------|
|                    |           | log2FC     | p-adj      |         |
| ENSMUSG00000000171 | Sdhb      | -0.1983493 | 0.00195243 | 2       |
| ENSMUSG00000000295 | Hddc2     | 0.36952854 | 0.00114912 | 4       |
| ENSMUSG00000000301 | Pemt      | -0.4572993 | 0.00428545 | 2       |
| ENSMUSG00000000326 | Comt      | 0.66418292 | 3.26E-11   | 3       |
| ENSMUSG00000000340 | Dbt       | -0.7050178 | 3.06E-25   | 2       |
| ENSMUSG00000000384 | Tbrg4     | -0.6050688 | 5.43E-07   | 1       |
| ENSMUSG00000000399 | Ndufa9    | 0.41963685 | 3.16E-14   | 4       |
| ENSMUSG00000000441 | Raf1      | 0.45012042 | 5.80E-08   | 4       |
| ENSMUSG00000000594 | Gm2a      | 1.977227   | 1.45E-98   | 4       |
| ENSMUSG00000000628 | Hk2       | -2.1236559 | 1.68E-288  | 1       |
| ENSMUSG00000000738 | Spg7      | 1.12986037 | 8.70E-21   | 4       |
| ENSMUSG00000000811 | Txnrd3    | -0.6824555 | 5.84E-17   | 1       |
| ENSMUSG00000001127 | Araf      | 0.93400488 | 1.07E-54   | 4       |
| ENSMUSG00000001156 | Mxd1      | -1.137696  | 2.55E-62   | 1       |
| ENSMUSG00000001175 | Calm1     | 1.02729624 | 2.98E-64   | 4       |
| ENSMUSG00000001285 | Myg1      | -0.468244  | 1.54E-07   | 1       |
| ENSMUSG00000001380 | Hars      | -0.2932876 | 3.37E-08   | 2       |
| ENSMUSG00000001424 | Snd1      | -0.2974797 | 2.10E-16   | 1       |
| ENSMUSG00000001445 | Mrpl10    | 0.26576551 | 4.95E-05   | 3       |
| ENSMUSG00000001755 | Coasy     | -0.4279981 | 0.0111228  | 1       |

|                    |          |            |            |   |
|--------------------|----------|------------|------------|---|
| ENSMUSG00000001786 | Fbxo7    | -0.4109019 | 6.84E-05   | 2 |
| ENSMUSG00000001829 | Clpb     | -0.3653233 | 7.41E-08   | 1 |
| ENSMUSG00000001870 | Ltbp1    | -0.6048225 | 1.08E-22   | 2 |
| ENSMUSG00000002010 | Idh3g    | -0.3122985 | 1.62E-09   | 1 |
| ENSMUSG00000002083 | Bbc3     | -0.9218587 | 2.30E-05   | 1 |
| ENSMUSG00000002332 | Dhrs1    | 0.39347668 | 5.95E-09   | 4 |
| ENSMUSG00000002346 | Slc25a42 | 1.58924876 | 3.39E-31   | 4 |
| ENSMUSG00000002416 | Ndufb2   | 0.75538681 | 1.44E-13   | 4 |
| ENSMUSG00000002661 | Alkbh7   | 0.78234443 | 8.87E-07   | 3 |
| ENSMUSG00000002741 | Ykt6     | 0.27895119 | 2.91E-06   | 4 |
| ENSMUSG00000002814 | Top3a    | -0.3270183 | 2.80E-07   | 2 |
| ENSMUSG00000002825 | Qtrt1    | -1.605452  | 1.50E-24   | 1 |
| ENSMUSG00000002846 | Timmdc1  | -0.1927766 | 0.0043757  | 1 |
| ENSMUSG00000002949 | Timm44   | -0.2400197 | 0.00410579 | 1 |
| ENSMUSG00000002984 | Tom40    | -0.9090189 | 3.93E-05   | 1 |
| ENSMUSG00000003161 | Sri      | 0.74578123 | 2.28E-39   | 4 |
| ENSMUSG00000003226 | Ranbp2   | -0.7728586 | 7.07E-12   | 2 |
| ENSMUSG00000003438 | Timm50   | -0.5701331 | 0.00082936 | 1 |
| ENSMUSG00000003458 | Ncstn    | 0.2233218  | 1.61E-05   | 4 |
| ENSMUSG00000003528 | Slc25a1  | 0.76593556 | 1.30E-49   | 3 |
| ENSMUSG00000003623 | Crot     | 1.09553091 | 4.77E-37   | 4 |
| ENSMUSG00000003762 | Adck4    | -0.4523151 | 0.00031491 | 1 |
| ENSMUSG00000003809 | Gcdh     | 1.16501713 | 2.66E-68   | 4 |
| ENSMUSG00000003923 | Tfam     | -1.0706438 | 2.13E-34   | 2 |
| ENSMUSG00000004040 | Stat3    | -0.1615788 | 0.02197879 | 3 |
| ENSMUSG00000004044 | Ptrf     | 0.70766329 | 3.47E-29   | 4 |

|                    |         |            |            |   |
|--------------------|---------|------------|------------|---|
| ENSMUSG00000004069 | Dnaja3  | -0.4770343 | 8.51E-36   | 1 |
| ENSMUSG00000004127 | Trmt10a | -0.7475608 | 2.06E-23   | 2 |
| ENSMUSG00000004207 | Psap    | 0.19458147 | 0.00503352 | 3 |
| ENSMUSG00000004233 | Wars2   | -0.2699839 | 0.0263952  | 2 |
| ENSMUSG00000004264 | Phb2    | -0.5087753 | 1.88E-13   | 1 |
| ENSMUSG00000004446 | Bid     | 0.27668073 | 2.37E-07   | 4 |
| ENSMUSG00000004637 | Wwox    | 0.45126552 | 2.08E-06   | 3 |
| ENSMUSG00000004748 | Mtfp1   | -1.9705039 | 3.25E-14   | 1 |
| ENSMUSG00000004771 | Rab11a  | -0.4515813 | 2.37E-10   | 2 |
| ENSMUSG00000004789 | Dlst    | -0.2400918 | 1.43E-16   | 2 |
| ENSMUSG00000004929 | Thop1   | -0.9557902 | 8.47E-06   | 1 |
| ENSMUSG00000004936 | Map2k1  | -0.4561838 | 2.24E-49   | 1 |
| ENSMUSG00000005161 | Prdx2   | 0.92354498 | 7.88E-21   | 4 |
| ENSMUSG00000005360 | Slc1a3  | 1.41835219 | 6.03E-232  | 3 |
| ENSMUSG00000005469 | Prkaca  | 1.09138121 | 6.15E-132  | 4 |
| ENSMUSG00000005510 | Ndufs3  | -0.4340482 | 1.52E-09   | 2 |
| ENSMUSG00000005667 | Mthfd2  | -1.260524  | 3.63E-109  | 1 |
| ENSMUSG00000005674 | Tomm40l | 0.76441367 | 1.11E-07   | 3 |
| ENSMUSG00000005683 | Cs      | 0.28679068 | 7.48E-09   | 4 |
| ENSMUSG00000005718 | Tfap4   | -0.5745555 | 4.63E-08   | 1 |
| ENSMUSG00000005981 | Trap1   | 0.54594886 | 9.12E-37   | 4 |
| ENSMUSG00000006057 | Atp5g1  | 0.50233053 | 0.00031751 | 4 |
| ENSMUSG00000006221 | Hspb7   | 3.38208228 | 9.15E-35   | 3 |
| ENSMUSG00000006378 | Gcat    | 1.52811759 | 3.39E-14   | 3 |
| ENSMUSG00000006494 | Pdk1    | 0.78613733 | 0.00015261 | 4 |
| ENSMUSG00000006519 | Cyba    | -0.966258  | 0.00441878 | 2 |

|                    |         |            |            |   |
|--------------------|---------|------------|------------|---|
| ENSMUSG00000006717 | Acot13  | 0.61803162 | 5.22E-25   | 3 |
| ENSMUSG00000006724 | Cyp27b1 | -1.7059961 | 3.65E-05   | 1 |
| ENSMUSG00000006782 | Cnp     | 0.52806961 | 0.00051637 | 4 |
| ENSMUSG00000006818 | Sod2    | -0.4440933 | 8.50E-26   | 1 |
| ENSMUSG00000007041 | Clic1   | 0.34593334 | 4.79E-07   | 4 |
| ENSMUSG00000007655 | Cav1    | 2.05615561 | 6.87E-141  | 4 |
| ENSMUSG00000008398 | Elk3    | 0.40890912 | 1.32E-09   | 4 |
| ENSMUSG00000008435 | Rdh13   | -0.933634  | 2.10E-78   | 1 |
| ENSMUSG00000008540 | Mgst1   | 1.57910579 | 2.96E-142  | 3 |
| ENSMUSG00000008683 | Rps15a  | -0.4633096 | 0.00021783 | 1 |
| ENSMUSG00000008892 | Vdac3   | -0.3114396 | 0.00930132 | 2 |
| ENSMUSG00000009013 | Dynl1   | 0.33945189 | 5.05E-07   | 4 |
| ENSMUSG00000009112 | Bcl2l13 | -0.658638  | 1.36E-37   | 2 |
| ENSMUSG00000009406 | Elk1    | 0.58672177 | 6.78E-19   | 4 |
| ENSMUSG00000009614 | Sardh   | 1.54773329 | 1.33E-62   | 3 |
| ENSMUSG00000009647 | Mcu     | -0.2603281 | 3.42E-05   | 3 |
| ENSMUSG00000009863 | Sdhb    | 0.46184137 | 8.46E-08   | 3 |
| ENSMUSG00000010054 | Tusc2   | -0.2378679 | 0.00242293 | 2 |
| ENSMUSG00000010609 | Psen2   | 0.79650237 | 1.06E-20   | 3 |
| ENSMUSG00000010651 | Acaa1b  | 1.58893587 | 5.43E-05   | 3 |
| ENSMUSG00000010663 | Fads1   | -0.2687096 | 2.04E-08   | 1 |
| ENSMUSG00000011254 | Thg11   | -0.605168  | 5.32E-16   | 2 |
| ENSMUSG00000013539 | Tango2  | 1.30406745 | 7.60E-50   | 4 |
| ENSMUSG00000013593 | Ndufs2  | 0.58420549 | 6.02E-30   | 4 |
| ENSMUSG00000013662 | Atad1   | -0.6586724 | 4.41E-16   | 1 |
| ENSMUSG00000013701 | Timm23  | -0.8462334 | 2.22E-16   | 2 |

|                    |           |            |            |   |
|--------------------|-----------|------------|------------|---|
| ENSMUSG00000013736 | Trnt1     | -0.9235302 | 4.06E-20   | 2 |
| ENSMUSG00000013997 | Nit1      | 0.26612206 | 0.0149282  | 4 |
| ENSMUSG00000014313 | Cox6c     | 0.85927017 | 1.34E-23   | 3 |
| ENSMUSG00000014554 | Dguok     | 0.6293764  | 3.18E-17   | 3 |
| ENSMUSG00000014606 | Slc25a11  | 0.39659568 | 2.64E-09   | 4 |
| ENSMUSG00000014633 | Cmc2      | 1.02513972 | 4.19E-21   | 3 |
| ENSMUSG00000015016 | Acsf3     | 1.13020451 | 5.96E-14   | 4 |
| ENSMUSG00000015112 | Slc25a13  | 1.17010639 | 1.22E-67   | 4 |
| ENSMUSG00000015133 | Lrrk1     | 0.81544295 | 4.38E-16   | 4 |
| ENSMUSG00000015247 | Nipsnap3b | 0.2825061  | 4.04E-07   | 4 |
| ENSMUSG00000015340 | Cybb      | -4.7006743 | 0.02403871 | 1 |
| ENSMUSG00000015478 | Rnf5      | 0.28656395 | 0.02490384 | 3 |
| ENSMUSG00000015672 | Mrpl32    | -0.3702275 | 9.54E-06   | 2 |
| ENSMUSG00000015750 | Aph1a     | 0.51479777 | 0.00182349 | 3 |
| ENSMUSG00000015790 | Surf1     | 0.50405635 | 1.42E-13   | 3 |
| ENSMUSG00000015806 | Qdpr      | 0.89562041 | 1.08E-41   | 4 |
| ENSMUSG00000015837 | Sqstm1    | -1.6335082 | 7.57E-109  | 1 |
| ENSMUSG00000015961 | Adss      | -0.2370694 | 2.11E-05   | 2 |
| ENSMUSG00000016128 | Stard13   | -0.5282695 | 2.18E-09   | 2 |
| ENSMUSG00000016252 | Atp5e     | 0.67501513 | 9.92E-09   | 3 |
| ENSMUSG00000016257 | Slmo2     | -0.2736215 | 0.00013005 | 1 |
| ENSMUSG00000016427 | Ndufa1    | 1.03490755 | 2.55E-17   | 3 |
| ENSMUSG00000016495 | Plgrkt    | 1.30672282 | 2.08E-43   | 4 |
| ENSMUSG00000016758 | Bik       | 3.63195877 | 2.67E-10   | 4 |
| ENSMUSG00000017119 | Nbr1      | -0.7553217 | 2.43E-41   | 1 |
| ENSMUSG00000017146 | Brcal     | -0.6700755 | 1.20E-14   | 2 |

|                    |               |            |            |   |
|--------------------|---------------|------------|------------|---|
| ENSMUSG00000017286 | Glod4         | 0.49916957 | 5.20E-09   | 4 |
| ENSMUSG00000018042 | Cyb5r3        | 0.71732813 | 1.55E-12   | 4 |
| ENSMUSG00000018167 | Stard3        | -0.5127854 | 9.14E-14   | 1 |
| ENSMUSG00000018196 | Glrx2         | 0.51017086 | 3.35E-07   | 4 |
| ENSMUSG00000018322 | Tomm34        | -0.3617185 | 2.50E-08   | 2 |
| ENSMUSG00000018405 | Mrm1          | -0.3016946 | 0.00716844 | 1 |
| ENSMUSG00000018446 | C1qbp         | -1.0744042 | 2.57E-42   | 1 |
| ENSMUSG00000018574 | Acadv1        | 0.45292622 | 1.63E-22   | 4 |
| ENSMUSG00000018599 | Mief2         | 0.81909839 | 7.28E-06   | 3 |
| ENSMUSG00000018740 | Slc25a35      | 2.63008817 | 3.93E-12   | 4 |
| ENSMUSG00000018796 | Acs11         | 1.22461241 | 1.96E-60   | 4 |
| ENSMUSG00000018848 | Rars          | -0.6179214 | 3.07E-11   | 1 |
| ENSMUSG00000018861 | Fdxr          | 1.05779012 | 7.62E-05   | 3 |
| ENSMUSG00000018882 | Mrpl45        | -0.2209468 | 0.00039785 | 2 |
| ENSMUSG00000018995 | Nars2         | -0.9987997 | 7.36E-31   | 1 |
| ENSMUSG00000019054 | Fis1          | 0.73956364 | 5.11E-10   | 4 |
| ENSMUSG00000019066 | Rab3d         | 2.40893512 | 4.78E-152  | 4 |
| ENSMUSG00000019082 | Slc25a22      | -0.7903031 | 0.0002029  | 1 |
| ENSMUSG00000019143 | Hars2         | 0.30519075 | 8.66E-05   | 4 |
| ENSMUSG00000019210 | Atp6v1e1      | -0.2921742 | 4.22E-08   | 1 |
| ENSMUSG00000019505 | Ubb           | -0.8411135 | 7.71E-27   | 1 |
| ENSMUSG00000019689 | 1110001J03Rik | 0.65404457 | 0.0008853  | 3 |
| ENSMUSG00000019710 | Mrpl24        | -0.305297  | 0.00887959 | 3 |
| ENSMUSG00000019763 | Rmnd1         | 0.67000945 | 8.14E-41   | 4 |
| ENSMUSG00000019774 | Mtrf11        | -0.8534432 | 6.81E-16   | 1 |
| ENSMUSG00000019831 | Wasf1         | -0.2303579 | 0.00479566 | 2 |



|                    |               |            |            |   |
|--------------------|---------------|------------|------------|---|
| ENSMUSG00000019843 | Fyn           | -0.5384898 | 1.01E-25   | 1 |
| ENSMUSG00000019851 | Perp          | 3.05829704 | 1.79E-167  | 4 |
| ENSMUSG00000019853 | Hebp2         | 0.37470337 | 8.99E-05   | 4 |
| ENSMUSG00000019863 | Qrs11         | 0.48345259 | 1.87E-08   | 4 |
| ENSMUSG00000019864 | Rtn4ip1       | 0.5484217  | 5.59E-07   | 3 |
| ENSMUSG00000019916 | P4ha1         | -0.1878388 | 0.01777168 | 2 |
| ENSMUSG00000019969 | Psen1         | -0.5764204 | 2.18E-19   | 2 |
| ENSMUSG00000019970 | Sgk1          | -1.1143731 | 0          | 1 |
| ENSMUSG00000020022 | Ndufa12       | -0.3629585 | 5.71E-05   | 3 |
| ENSMUSG00000020038 | Cry1          | -1.1380634 | 1.84E-89   | 1 |
| ENSMUSG00000020063 | Sirt1         | -1.4117697 | 5.05E-67   | 2 |
| ENSMUSG00000020075 | Ddx21         | -1.5099482 | 1.79E-189  | 1 |
| ENSMUSG00000020079 | Supv311       | -0.5422684 | 7.55E-20   | 2 |
| ENSMUSG00000020085 | Aifm2         | -0.9070637 | 3.04E-69   | 1 |
| ENSMUSG00000020108 | Ddit4         | -0.5038642 | 5.95E-30   | 1 |
| ENSMUSG00000020130 | Tbc1d15       | -1.3181448 | 1.20E-79   | 1 |
| ENSMUSG00000020250 | Txnrd1        | -0.858475  | 4.69E-198  | 1 |
| ENSMUSG00000020253 | Ppm1m         | 0.57094956 | 1.67E-13   | 3 |
| ENSMUSG00000020256 | Aldh112       | -0.7364757 | 5.83E-08   | 1 |
| ENSMUSG00000020268 | Lym7          | 0.76104534 | 0.00972685 | 4 |
| ENSMUSG00000020284 | 1810043G02Rik | 0.92740499 | 1.98E-06   | 3 |
| ENSMUSG00000020321 | Mdh1          | 0.75759516 | 8.67E-22   | 4 |
| ENSMUSG00000020333 | Acs16         | -1.499116  | 4.29E-25   | 2 |
| ENSMUSG00000020334 | Slc22a4       | 1.02643281 | 1.36E-09   | 3 |
| ENSMUSG00000020359 | Phykpl        | -0.3975433 | 0.02056776 | 2 |
| ENSMUSG00000020366 | Mapk9         | 0.84868109 | 1.40E-22   | 4 |

|                    |         |            |            |   |
|--------------------|---------|------------|------------|---|
| ENSMUSG00000020372 | Gnb211  | -0.5723422 | 4.38E-08   | 1 |
| ENSMUSG00000020402 | Vdac1   | 0.32608001 | 8.50E-10   | 4 |
| ENSMUSG00000020456 | Ogdh    | 0.48355947 | 2.41E-33   | 4 |
| ENSMUSG00000020477 | Mrps24  | 1.05958078 | 5.00E-18   | 3 |
| ENSMUSG00000020514 | Mrpl22  | -0.3338096 | 9.41E-07   | 2 |
| ENSMUSG00000020527 | Myo19   | -0.7702848 | 1.17E-11   | 2 |
| ENSMUSG00000020532 | Acaca   | -0.2405592 | 0.01221636 | 2 |
| ENSMUSG00000020534 | Shmt1   | -1.2423428 | 1.34E-126  | 1 |
| ENSMUSG00000020537 | Drg2    | -0.6360446 | 2.12E-22   | 2 |
| ENSMUSG00000020549 | Elac2   | -0.3089502 | 6.24E-09   | 2 |
| ENSMUSG00000020593 | Lpin1   | 2.41565415 | 8.48E-146  | 3 |
| ENSMUSG00000020605 | Hs1bp3  | 0.4966435  | 3.20E-11   | 4 |
| ENSMUSG00000020620 | Abca8b  | 1.00868793 | 1.67E-08   | 3 |
| ENSMUSG00000020621 | Rdh14   | 0.29821802 | 0.02591736 | 3 |
| ENSMUSG00000020630 | Rnaseh1 | -0.4879387 | 0.00084541 | 1 |
| ENSMUSG00000020638 | Cmpk2   | -8.8020177 | 2.81E-12   | 2 |
| ENSMUSG00000020641 | Rsad2   | -11.1257   | 2.56E-26   | 1 |
| ENSMUSG00000020657 | Dnajc27 | 0.36796276 | 3.13E-06   | 3 |
| ENSMUSG00000020664 | Dld     | -0.3576807 | 5.05E-07   | 2 |
| ENSMUSG00000020697 | Lig3    | -0.4521462 | 5.51E-06   | 2 |
| ENSMUSG00000020715 | Ern1    | -1.4817952 | 0          | 1 |
| ENSMUSG00000020736 | Nt5c    | 0.58074721 | 2.79E-06   | 3 |
| ENSMUSG00000020775 | Mrpl38  | -0.2704786 | 0.00439958 | 1 |
| ENSMUSG00000020777 | Acox1   | 0.36124889 | 5.68E-26   | 3 |
| ENSMUSG00000020843 | Timm22  | 0.24671441 | 0.00721257 | 4 |
| ENSMUSG00000020849 | Ywhae   | -0.2246124 | 0.00137784 | 2 |

|                    |               |            |            |   |
|--------------------|---------------|------------|------------|---|
| ENSMUSG00000020857 | Nme2          | -0.3307009 | 0.00239469 | 1 |
| ENSMUSG00000020869 | Lrrc59        | -0.4488146 | 8.91E-26   | 1 |
| ENSMUSG00000020917 | Acly          | 0.84818333 | 1.18E-74   | 3 |
| ENSMUSG00000021023 | 1110008L16Rik | -0.298754  | 0.01511194 | 2 |
| ENSMUSG00000021033 | Gstz1         | 0.97888279 | 7.99E-29   | 4 |
| ENSMUSG00000021036 | Sptlc2        | -0.4384034 | 5.34E-11   | 1 |
| ENSMUSG00000021040 | Slirp         | 0.74484336 | 1.99E-07   | 4 |
| ENSMUSG00000021044 | Adck1         | 1.89728594 | 4.95E-104  | 3 |
| ENSMUSG00000021054 | Sgpp1         | 0.24445673 | 0.00062883 | 4 |
| ENSMUSG00000021079 | Timm9         | -0.5519143 | 3.85E-22   | 1 |
| ENSMUSG00000021125 | Arg2          | 0.4887855  | 5.06E-13   | 3 |
| ENSMUSG00000021185 | 9030617O03Rik | 5.04215367 | 6.18E-47   | 4 |
| ENSMUSG00000021189 | Atxn3         | -0.5573773 | 7.16E-08   | 1 |
| ENSMUSG00000021217 | Tshz3         | -0.6645825 | 6.21E-09   | 1 |
| ENSMUSG00000021226 | Acot2         | -2.4151501 | 3.89E-165  | 1 |
| ENSMUSG00000021235 | Coq6          | 0.77716783 | 2.90E-10   | 4 |
| ENSMUSG00000021238 | Aldh6a1       | 1.81302429 | 1.61E-59   | 4 |
| ENSMUSG00000021241 | Isca2         | 0.50504953 | 3.12E-10   | 3 |
| ENSMUSG00000021287 | Xrcc3         | 0.307106   | 0.01820006 | 4 |
| ENSMUSG00000021290 | 2010107E04Rik | 0.73616145 | 3.71E-08   | 4 |
| ENSMUSG00000021302 | Ggps1         | -0.4011364 | 0.00103605 | 2 |
| ENSMUSG00000021339 | Mrs2          | 0.37898117 | 0.00043448 | 4 |
| ENSMUSG00000021361 | Tmem14c       | 0.64740793 | 7.52E-20   | 3 |
| ENSMUSG00000021371 | Mcur1         | -0.694783  | 4.48E-18   | 2 |
| ENSMUSG00000021408 | Ripk1         | -0.3304534 | 0.02179527 | 2 |
| ENSMUSG00000021417 | Eci2          | 0.60467733 | 1.85E-26   | 4 |

|                    |          |            |            |   |
|--------------------|----------|------------|------------|---|
| ENSMUSG00000021420 | Fars2    | 0.36728507 | 8.90E-05   | 3 |
| ENSMUSG00000021432 | Slc35b3  | -0.5370141 | 2.98E-11   | 2 |
| ENSMUSG00000021470 | Ercc6l2  | -0.9269518 | 1.06E-23   | 2 |
| ENSMUSG00000021474 | Sfxn1    | -0.1899539 | 0.01660752 | 2 |
| ENSMUSG00000021496 | Pcbd2    | 1.22796966 | 1.82E-20   | 3 |
| ENSMUSG00000021519 | Mterf3   | -0.7496545 | 5.09E-14   | 2 |
| ENSMUSG00000021520 | Uqcrb    | 0.3221319  | 0.00234061 | 4 |
| ENSMUSG00000021532 | Fastkd3  | -1.1185594 | 1.86E-29   | 2 |
| ENSMUSG00000021546 | Hnrnpk   | -0.4292819 | 1.34E-16   | 2 |
| ENSMUSG00000021577 | Sdha     | 0.20066657 | 0.00065839 | 4 |
| ENSMUSG00000021591 | Glrx     | -0.8623132 | 2.22E-41   | 1 |
| ENSMUSG00000021595 | Nsun2    | -1.3436835 | 2.94E-165  | 2 |
| ENSMUSG00000021607 | Mrpl36   | -0.4391408 | 5.03E-07   | 1 |
| ENSMUSG00000021611 | Tert     | -8.3145851 | 5.35E-11   | 2 |
| ENSMUSG00000021646 | Mccc2    | 1.0094001  | 6.01E-28   | 4 |
| ENSMUSG00000021650 | Ptcd2    | -0.2601994 | 0.00027206 | 2 |
| ENSMUSG00000021669 | Col4a3bp | -0.9028557 | 1.02E-20   | 2 |
| ENSMUSG00000021692 | Dimt1    | -1.4373814 | 1.23E-76   | 1 |
| ENSMUSG00000021707 | Dhfr     | -1.889766  | 1.69E-125  | 1 |
| ENSMUSG00000021731 | Mrps30   | -1.2142072 | 4.09E-43   | 2 |
| ENSMUSG00000021748 | Pdhb     | -0.4563959 | 6.19E-19   | 1 |
| ENSMUSG00000021764 | Ndufs4   | 0.35602557 | 0.00087232 | 4 |
| ENSMUSG00000021792 | Fam213a  | -3.7298526 | 3.40E-120  | 1 |
| ENSMUSG00000021809 | Nudt13   | 0.57290316 | 0.00160491 | 4 |
| ENSMUSG00000021868 | Ppif     | -0.8059533 | 1.84E-30   | 1 |
| ENSMUSG00000021892 | Sh3bp5   | 1.11500232 | 2.06E-40   | 4 |

|                    |          |            |            |   |
|--------------------|----------|------------|------------|---|
| ENSMUSG00000021906 | Oxnad1   | -1.1251173 | 7.19E-42   | 2 |
| ENSMUSG00000021913 | Ogdhl    | 0.73119804 | 1.46E-07   | 3 |
| ENSMUSG00000021936 | Mapk8    | -0.6695912 | 2.89E-14   | 2 |
| ENSMUSG00000021939 | Ctsb     | -0.4157566 | 4.22E-22   | 1 |
| ENSMUSG00000021973 | Micu2    | 0.56955273 | 2.31E-08   | 4 |
| ENSMUSG00000021993 | Mipep    | 0.51920208 | 2.37E-06   | 2 |
| ENSMUSG00000022003 | Slc25a30 | -0.6885922 | 1.03E-19   | 1 |
| ENSMUSG00000022013 | Dnajc15  | 0.25785153 | 0.04725355 | 4 |
| ENSMUSG00000022022 | Mtrf1    | -4.9707051 | 1.05E-31   | 2 |
| ENSMUSG00000022037 | Clu      | -3.5900259 | 3.43E-50   | 3 |
| ENSMUSG00000022048 | Dpysl2   | 1.1443579  | 5.11E-60   | 4 |
| ENSMUSG00000022051 | Bnip3l   | -0.32087   | 2.77E-07   | 2 |
| ENSMUSG00000022110 | Sucla2   | 0.27892309 | 0.00479767 | 4 |
| ENSMUSG00000022126 | Irg1     | -7.2535082 | 1.59E-08   | 1 |
| ENSMUSG00000022186 | Oxct1    | 0.50656236 | 5.99E-16   | 4 |
| ENSMUSG00000022200 | Golph3   | -0.6662561 | 2.01E-17   | 2 |
| ENSMUSG00000022204 | Ngdn     | -0.8061057 | 5.22E-19   | 2 |
| ENSMUSG00000022210 | Dhrs4    | -0.3342065 | 0.0040372  | 2 |
| ENSMUSG00000022221 | Ripk3    | -0.7532068 | 7.52E-14   | 2 |
| ENSMUSG00000022244 | Amacr    | 0.44265883 | 0.00020077 | 3 |
| ENSMUSG00000022246 | Rai14    | -0.9901942 | 7.96E-62   | 1 |
| ENSMUSG00000022253 | Nadk2    | 0.86978432 | 1.75E-58   | 3 |
| ENSMUSG00000022323 | Hrsp12   | 1.67454458 | 1.88E-78   | 4 |
| ENSMUSG00000022337 | Emc2     | 1.18003289 | 1.06E-42   | 4 |
| ENSMUSG00000022354 | Ndufb9   | 0.6491557  | 1.36E-14   | 3 |
| ENSMUSG00000022386 | Trmu     | 0.30110021 | 0.00166915 | 3 |

|                    |          |            |            |   |
|--------------------|----------|------------|------------|---|
| ENSMUSG00000022401 | Xpnp3    | -0.2822907 | 0.00047438 | 2 |
| ENSMUSG00000022404 | Slc25a17 | 0.13353876 | 0.04687278 | 4 |
| ENSMUSG00000022407 | Adsl     | -0.5241246 | 8.76E-08   | 1 |
| ENSMUSG00000022412 | Mief1    | -0.2709653 | 5.64E-09   | 1 |
| ENSMUSG00000022427 | Tomm22   | 0.23000931 | 0.0006775  | 4 |
| ENSMUSG00000022437 | Samm50   | 0.38481923 | 2.65E-10   | 3 |
| ENSMUSG00000022450 | Ndufa6   | 0.45844609 | 0.01149114 | 3 |
| ENSMUSG00000022452 | Smdt1    | 1.00301768 | 7.84E-10   | 3 |
| ENSMUSG00000022477 | Aco2     | 0.6481377  | 1.32E-28   | 4 |
| ENSMUSG00000022610 | Mapk12   | -0.7484403 | 3.23E-30   | 1 |
| ENSMUSG00000022668 | Gtpbp8   | -0.5359319 | 2.54E-12   | 1 |
| ENSMUSG00000022679 | Mpv17l   | 1.44266007 | 1.17E-41   | 3 |
| ENSMUSG00000022704 | Qtrtd1   | -1.7950811 | 2.83E-245  | 1 |
| ENSMUSG00000022751 | Nit2     | 0.73239294 | 2.53E-14   | 4 |
| ENSMUSG00000022752 | Tomm70a  | -1.097256  | 8.10E-40   | 1 |
| ENSMUSG00000022792 | Yars2    | -0.6190243 | 2.06E-21   | 1 |
| ENSMUSG00000022797 | Tfrc     | -1.379734  | 3.87E-49   | 2 |
| ENSMUSG00000022812 | Gsk3b    | -0.1800777 | 0.03568323 | 1 |
| ENSMUSG00000022820 | Ndufb4   | 0.78740272 | 9.49E-19   | 4 |
| ENSMUSG00000022890 | Atp5j    | 0.25982066 | 0.00095427 | 3 |
| ENSMUSG00000022906 | Parp9    | -1.24878   | 6.04E-24   | 2 |
| ENSMUSG00000022956 | Atp5o    | 0.34574865 | 2.32E-07   | 3 |
| ENSMUSG00000022982 | Sod1     | 0.48179958 | 1.00E-09   | 3 |
| ENSMUSG00000023020 | Cox14    | 0.79703497 | 0.00693568 | 3 |
| ENSMUSG00000023030 | Slc11a2  | -0.3742294 | 1.22E-17   | 1 |
| ENSMUSG00000023034 | Nr4a1    | -4.2292103 | 0          | 1 |

|                    |          |            |            |   |
|--------------------|----------|------------|------------|---|
| ENSMUSG00000023087 | Ccrn4l   | -1.3882112 | 3.53E-113  | 2 |
| ENSMUSG00000023089 | Ndufa5   | 1.28493787 | 9.28E-35   | 4 |
| ENSMUSG00000023094 | Msrb2    | 0.80957297 | 0.0179781  | 4 |
| ENSMUSG00000023805 | Synj2    | 1.09231229 | 1.62E-67   | 4 |
| ENSMUSG00000023827 | Agpat4   | 0.57312634 | 1.31E-09   | 3 |
| ENSMUSG00000023832 | Acat2    | 1.09053387 | 1.17E-121  | 3 |
| ENSMUSG00000023861 | Mpc1     | 0.88988771 | 3.63E-24   | 4 |
| ENSMUSG00000023921 | Mut      | 1.64262661 | 1.07E-141  | 4 |
| ENSMUSG00000023938 | Aars2    | 0.70369757 | 0.00283306 | 3 |
| ENSMUSG00000023939 | Mrpl14   | 0.79162187 | 0.01026992 | 3 |
| ENSMUSG00000024012 | Mtch1    | 0.74705905 | 1.15E-16   | 4 |
| ENSMUSG00000024030 | Abcg1    | 1.26168767 | 7.33E-12   | 3 |
| ENSMUSG00000024038 | Ndufv3   | 1.46266682 | 9.27E-40   | 4 |
| ENSMUSG00000024045 | Akap8    | -0.2097735 | 4.45E-07   | 2 |
| ENSMUSG00000024082 | Ndufaf7  | 1.12860985 | 3.83E-57   | 4 |
| ENSMUSG00000024087 | Cyp1b1   | 4.29962053 | 0          | 4 |
| ENSMUSG00000024099 | Ndufv2   | 0.90074217 | 5.55E-19   | 4 |
| ENSMUSG00000024132 | Eci1     | 0.24440619 | 0.00414366 | 3 |
| ENSMUSG00000024158 | Hagh     | 0.54608646 | 7.23E-18   | 3 |
| ENSMUSG00000024177 | Nme4     | 0.89051281 | 5.00E-14   | 4 |
| ENSMUSG00000024191 | Bnip1    | 0.91889966 | 1.58E-12   | 4 |
| ENSMUSG00000024208 | Uqcc2    | 0.82992846 | 8.88E-07   | 3 |
| ENSMUSG00000024234 | Mtpap    | -0.6328166 | 9.59E-16   | 2 |
| ENSMUSG00000024248 | Cox7a2l  | 0.49606229 | 1.92E-19   | 3 |
| ENSMUSG00000024259 | Slc25a46 | -0.531535  | 1.88E-14   | 2 |
| ENSMUSG00000024349 | Tmem173  | -3.1109332 | 4.37E-127  | 3 |

|                    |               |            |            |   |
|--------------------|---------------|------------|------------|---|
| ENSMUSG00000024359 | Hspa9         | -1.0700813 | 2.62E-40   | 1 |
| ENSMUSG00000024378 | Stard4        | 0.58527678 | 3.90E-27   | 3 |
| ENSMUSG00000024414 | Mrpl27        | 0.26762091 | 0.00485986 | 3 |
| ENSMUSG00000024431 | Nr3c1         | -0.24885   | 0.02753035 | 2 |
| ENSMUSG00000024436 | Mrps18b       | -0.6247605 | 1.61E-21   | 1 |
| ENSMUSG00000024462 | Gabbr1        | 0.27063125 | 6.18E-05   | 3 |
| ENSMUSG00000024507 | Hsd17b4       | 0.39681084 | 5.28E-11   | 4 |
| ENSMUSG00000024521 | Pmaip1        | 0.29947679 | 0.00010397 | 4 |
| ENSMUSG00000024527 | Afg3l2        | -0.3580722 | 1.75E-24   | 1 |
| ENSMUSG00000024530 | Slmo1         | -1.7813988 | 5.61E-20   | 1 |
| ENSMUSG00000024533 | Spire1        | -1.4740292 | 5.71E-99   | 1 |
| ENSMUSG00000024556 | Me2           | -0.2650763 | 0.00632416 | 2 |
| ENSMUSG00000024580 | Grpel2        | -1.0293352 | 1.35E-49   | 1 |
| ENSMUSG00000024587 | Nars          | -1.6311718 | 2.43E-114  | 1 |
| ENSMUSG00000024588 | Fech          | 0.59634961 | 4.92E-19   | 4 |
| ENSMUSG00000024592 | C330018D20Rik | -1.1079479 | 2.04E-16   | 2 |
| ENSMUSG00000024608 | Rps14         | -0.3265115 | 0.04181656 | 2 |
| ENSMUSG00000024617 | Camk2a        | 5.67698641 | 0.00018656 | 4 |
| ENSMUSG00000024645 | Timm21        | -0.2976573 | 0.03449897 | 1 |
| ENSMUSG00000024646 | Cyb5a         | 0.92715058 | 5.15E-24   | 3 |
| ENSMUSG00000024659 | Anxa1         | 2.24669962 | 2.88E-163  | 4 |
| ENSMUSG00000024661 | Fth1          | 1.558491   | 1.37E-87   | 3 |
| ENSMUSG00000024683 | Mrpl16        | 0.16547121 | 0.02281213 | 4 |
| ENSMUSG00000024712 | Rfk           | 0.80738317 | 2.82E-40   | 4 |
| ENSMUSG00000024782 | Ak3           | 1.39617215 | 4.18E-63   | 4 |
| ENSMUSG00000024827 | Gldc          | 2.19045363 | 5.65E-142  | 4 |



|                    |          |            |            |   |
|--------------------|----------|------------|------------|---|
| ENSMUSG00000024887 | Asah2    | 0.76670294 | 1.32E-10   | 4 |
| ENSMUSG00000024892 | Pcx      | 1.90319244 | 1.18E-22   | 3 |
| ENSMUSG00000024900 | Cpt1a    | 1.15808955 | 1.80E-89   | 4 |
| ENSMUSG00000024902 | Mrpl11   | 0.59533569 | 2.22E-06   | 4 |
| ENSMUSG00000024942 | Capn1    | 1.49034675 | 1.24E-50   | 4 |
| ENSMUSG00000024944 | Arl2     | 0.76141713 | 0.00046794 | 4 |
| ENSMUSG00000024953 | Prdx5    | -0.9691564 | 3.72E-06   | 1 |
| ENSMUSG00000024959 | Bad      | 0.62125519 | 0.02684046 | 3 |
| ENSMUSG00000024963 | Dnajc4   | 1.11138509 | 1.43E-08   | 3 |
| ENSMUSG00000024978 | Gpam     | 0.74556924 | 3.26E-13   | 4 |
| ENSMUSG00000024981 | Acs15    | 0.76908466 | 2.94E-20   | 4 |
| ENSMUSG00000024999 | Noc3l    | -1.3219893 | 1.65E-61   | 1 |
| ENSMUSG00000025007 | Aldh18a1 | -1.0255773 | 9.46E-57   | 1 |
| ENSMUSG00000025036 | Sfxn2    | 0.25054937 | 0.0040373  | 4 |
| ENSMUSG00000025037 | Maoa     | 0.34412497 | 0.00014646 | 4 |
| ENSMUSG00000025040 | Fundc1   | 0.82817815 | 2.36E-14   | 4 |
| ENSMUSG00000025059 | Gk       | 0.36846757 | 5.05E-07   | 3 |
| ENSMUSG00000025086 | Trub1    | -0.5109574 | 1.10E-15   | 1 |
| ENSMUSG00000025140 | Pycr1    | -1.0961737 | 7.57E-18   | 1 |
| ENSMUSG00000025150 | Cbr2     | 6.7344776  | 2.54E-280  | 4 |
| ENSMUSG00000025176 | Hoga1    | 1.66266561 | 7.66E-29   | 4 |
| ENSMUSG00000025178 | Pi4k2a   | -0.2039408 | 6.64E-06   | 1 |
| ENSMUSG00000025204 | Ndufb8   | 0.91606108 | 1.28E-16   | 4 |
| ENSMUSG00000025209 | Peo1     | -0.889677  | 2.78E-151  | 1 |
| ENSMUSG00000025212 | Sfxn3    | 0.32406405 | 3.67E-10   | 4 |
| ENSMUSG00000025220 | Mgea5    | -0.9040583 | 4.42E-32   | 2 |

|                    |          |            |            |   |
|--------------------|----------|------------|------------|---|
| ENSMUSG00000025224 | Gbf1     | 0.41814253 | 5.87E-10   | 4 |
| ENSMUSG00000025269 | Apex2    | -0.8646415 | 7.39E-40   | 2 |
| ENSMUSG00000025277 | Abhd6    | 1.22424877 | 5.39E-41   | 4 |
| ENSMUSG00000025287 | Acot9    | -0.2376717 | 0.00634556 | 2 |
| ENSMUSG00000025289 | Prdx4    | 0.78712002 | 1.81E-15   | 4 |
| ENSMUSG00000025393 | Atp5b    | 0.25209633 | 6.97E-07   | 4 |
| ENSMUSG00000025403 | Shmt2    | -1.3436235 | 4.75E-09   | 1 |
| ENSMUSG00000025428 | Atp5a1   | 0.2964131  | 2.25E-11   | 4 |
| ENSMUSG00000025436 | Xrcc6bp1 | 0.68023378 | 0.00010437 | 3 |
| ENSMUSG00000025453 | Nnt      | 0.3328759  | 2.84E-27   | 4 |
| ENSMUSG00000025465 | Echs1    | 0.19217499 | 0.017864   | 3 |
| ENSMUSG00000025525 | Apool    | 0.89789482 | 4.41E-17   | 4 |
| ENSMUSG00000025545 | Clybl    | 1.57224732 | 6.01E-13   | 4 |
| ENSMUSG00000025582 | Nptx1    | -3.8306804 | 0.00022101 | 2 |
| ENSMUSG00000025651 | Uqcrc1   | 0.65751311 | 1.28E-05   | 4 |
| ENSMUSG00000025665 | Rps6ka6  | 2.3076014  | 1.29E-06   | 4 |
| ENSMUSG00000025733 | Rhot2    | 0.4677121  | 8.01E-05   | 3 |
| ENSMUSG00000025745 | Hadha    | 0.57509431 | 1.69E-41   | 4 |
| ENSMUSG00000025781 | Atp5c1   | 0.55526313 | 3.18E-17   | 4 |
| ENSMUSG00000025792 | Slc25a10 | 1.08715456 | 0.00027556 | 3 |
| ENSMUSG00000025810 | Nrp1     | -0.4755315 | 3.02E-10   | 2 |
| ENSMUSG00000025815 | Dhtkd1   | 1.23004702 | 3.50E-08   | 4 |
| ENSMUSG00000025825 | Iscu     | 0.73295114 | 1.17E-50   | 3 |
| ENSMUSG00000025889 | Snca     | 1.06992205 | 0.04802703 | 4 |
| ENSMUSG00000025911 | Adhfe1   | -0.9776407 | 0.00205074 | 3 |
| ENSMUSG00000025933 | Tmem14a  | 1.43922864 | 1.56E-06   | 4 |

|                    |               |            |            |   |
|--------------------|---------------|------------|------------|---|
| ENSMUSG00000025937 | Lactb2        | 0.30809292 | 4.40E-12   | 3 |
| ENSMUSG00000025950 | Idh1          | 2.6233119  | 0          | 4 |
| ENSMUSG00000025958 | Creb1         | -0.5475513 | 2.41E-07   | 2 |
| ENSMUSG00000025962 | Fastkd2       | -0.6316267 | 1.45E-26   | 2 |
| ENSMUSG00000025971 | 9430016H08Rik | -0.4806964 | 2.85E-06   | 2 |
| ENSMUSG00000025980 | Hspd1         | -0.5412217 | 1.88E-10   | 1 |
| ENSMUSG00000025981 | Coq10b        | -0.9683976 | 1.88E-76   | 2 |
| ENSMUSG00000025991 | Cps1          | -3.353266  | 0.00564918 | 1 |
| ENSMUSG00000026028 | Trak2         | -0.6565737 | 1.21E-17   | 2 |
| ENSMUSG00000026032 | Ndufb3        | 0.65365487 | 4.30E-14   | 3 |
| ENSMUSG00000026036 | Nif311        | -0.706422  | 4.25E-16   | 1 |
| ENSMUSG00000026096 | Osgpl1        | 0.63506973 | 1.07E-06   | 4 |
| ENSMUSG00000026103 | Gls           | -0.516767  | 1.23E-07   | 2 |
| ENSMUSG00000026142 | Rhbdd1        | -2.0451863 | 4.26E-206  | 1 |
| ENSMUSG00000026154 | Sdhaf4        | 1.15568711 | 4.88E-19   | 4 |
| ENSMUSG00000026170 | Cyp27a1       | 1.04483174 | 0.03705664 | 4 |
| ENSMUSG00000026172 | Bcs11         | 0.8015804  | 2.51E-22   | 4 |
| ENSMUSG00000026179 | Pnkd          | 1.21319897 | 6.62E-21   | 3 |
| ENSMUSG00000026189 | Pecr          | -1.2711096 | 3.48E-30   | 2 |
| ENSMUSG00000026192 | Atic          | -0.9984297 | 0          | 1 |
| ENSMUSG00000026198 | Abcb6         | 0.60345482 | 0.03049598 | 4 |
| ENSMUSG00000026248 | Mrpl44        | -0.2747455 | 0.00071471 | 1 |
| ENSMUSG00000026255 | Efhd1         | 2.66691295 | 0.01146085 | 3 |
| ENSMUSG00000026260 | Ndufa10       | 0.38681747 | 4.00E-11   | 4 |
| ENSMUSG00000026273 | Mterf4        | -0.2623228 | 0.00064263 | 1 |
| ENSMUSG00000026278 | Bok           | 3.79633477 | 3.50E-123  | 4 |

|                    |          |            |            |   |
|--------------------|----------|------------|------------|---|
| ENSMUSG00000026281 | Dtymk    | 0.19300588 | 0.00038665 | 3 |
| ENSMUSG00000026385 | Dbi      | 0.70672932 | 2.15E-13   | 3 |
| ENSMUSG00000026425 | Srgap2   | 0.25834434 | 0.00170715 | 4 |
| ENSMUSG00000026433 | Rab29    | 1.07626119 | 3.98E-20   | 4 |
| ENSMUSG00000026456 | Cyb5r1   | -0.935173  | 6.25E-192  | 1 |
| ENSMUSG00000026473 | Glul     | -0.1113591 | 0.03853553 | 3 |
| ENSMUSG00000026489 | Adck3    | 2.36032649 | 2.19E-13   | 4 |
| ENSMUSG00000026492 | Tfb2m    | -0.8542084 | 1.06E-42   | 1 |
| ENSMUSG00000026496 | Parp1    | 0.77306527 | 1.03E-17   | 4 |
| ENSMUSG00000026499 | Acbd3    | -0.4458398 | 2.13E-08   | 2 |
| ENSMUSG00000026509 | Capn2    | 1.01096507 | 1.01E-59   | 4 |
| ENSMUSG00000026520 | Pycr2    | -0.5309142 | 0.01884834 | 1 |
| ENSMUSG00000026526 | Fh1      | 0.67919161 | 7.30E-25   | 4 |
| ENSMUSG00000026554 | Dcaf8    | 0.10932178 | 0.02655154 | 3 |
| ENSMUSG00000026568 | Mpc2     | 1.07376886 | 1.09E-22   | 4 |
| ENSMUSG00000026618 | Iars2    | 0.14405749 | 0.0263952  | 4 |
| ENSMUSG00000026632 | Tatdn3   | 1.37350103 | 1.66E-16   | 4 |
| ENSMUSG00000026664 | Phyh     | 1.58511722 | 1.63E-118  | 3 |
| ENSMUSG00000026687 | Aldh9a1  | 0.61644012 | 1.67E-63   | 3 |
| ENSMUSG00000026701 | Prdx6    | -0.5968278 | 4.11E-19   | 2 |
| ENSMUSG00000026709 | Dars2    | 0.94172162 | 1.00E-30   | 4 |
| ENSMUSG00000026784 | Pdss1    | -0.3311898 | 0.00063163 | 2 |
| ENSMUSG00000026797 | Stxbp1   | 0.1766312  | 0.00255742 | 3 |
| ENSMUSG00000026819 | Slc25a25 | -0.6541252 | 4.47E-16   | 1 |
| ENSMUSG00000026820 | Ptges2   | 0.37090509 | 0.01035994 | 3 |
| ENSMUSG00000026825 | Dnm1     | 0.51638616 | 7.25E-05   | 4 |

|                    |          |            |            |   |
|--------------------|----------|------------|------------|---|
| ENSMUSG00000026827 | Gpd2     | 0.19595923 | 0.0055621  | 4 |
| ENSMUSG00000026853 | Crat     | 1.13773402 | 6.75E-95   | 4 |
| ENSMUSG00000026864 | Hspa5    | -1.3014479 | 2.63E-79   | 2 |
| ENSMUSG00000026880 | Stom     | -1.4586362 | 0          | 1 |
| ENSMUSG00000026895 | Ndufa8   | 0.72708073 | 2.11E-09   | 4 |
| ENSMUSG00000026932 | Nacc2    | 2.62217397 | 3.85E-144  | 4 |
| ENSMUSG00000027010 | Slc25a12 | 1.09633242 | 2.44E-84   | 3 |
| ENSMUSG00000027076 | Timm10   | -1.7220869 | 1.68E-69   | 1 |
| ENSMUSG00000027086 | Fastkd1  | -0.5566289 | 7.27E-07   | 2 |
| ENSMUSG00000027104 | Atf2     | -0.74907   | 1.58E-22   | 1 |
| ENSMUSG00000027187 | Cat      | 1.31926744 | 1.29E-60   | 4 |
| ENSMUSG00000027199 | Gatm     | -4.3398695 | 0.00552593 | 2 |
| ENSMUSG00000027223 | Mapk8ip1 | 0.56450116 | 9.09E-08   | 3 |
| ENSMUSG00000027227 | Sord     | 0.97569731 | 6.54E-57   | 4 |
| ENSMUSG00000027244 | Atg13    | -0.667149  | 1.13E-28   | 1 |
| ENSMUSG00000027282 | Mtch2    | -0.7639522 | 3.98E-34   | 2 |
| ENSMUSG00000027305 | Ndufaf1  | -0.2992722 | 0.0001627  | 2 |
| ENSMUSG00000027323 | Rad51    | -0.9665335 | 1.47E-95   | 2 |
| ENSMUSG00000027332 | Ivd      | 0.63981685 | 2.42E-29   | 4 |
| ENSMUSG00000027357 | Crls1    | -0.4476888 | 0.00137273 | 1 |
| ENSMUSG00000027367 | Stard7   | 0.2072992  | 0.01320174 | 3 |
| ENSMUSG00000027371 | Fahd2a   | -6.6111445 | 7.39E-07   | 2 |
| ENSMUSG00000027381 | Bcl2l11  | -0.1285517 | 0.04095491 | 1 |
| ENSMUSG00000027384 | Ndufaf5  | 0.51310673 | 0.00036365 | 4 |
| ENSMUSG00000027406 | Idh3b    | 0.10867119 | 0.03612487 | 3 |
| ENSMUSG00000027424 | Mgme1    | -0.8032826 | 1.43E-26   | 1 |

|                    |               |            |            |   |
|--------------------|---------------|------------|------------|---|
| ENSMUSG00000027495 | Fam210b       | 1.03936126 | 2.39E-32   | 3 |
| ENSMUSG00000027599 | Armc1         | 0.26175528 | 0.0003609  | 4 |
| ENSMUSG00000027601 | Mtfr1         | -0.8175657 | 5.67E-32   | 1 |
| ENSMUSG00000027618 | Nfs1          | 0.4483784  | 4.37E-09   | 3 |
| ENSMUSG00000027637 | 1110008F13Rik | 0.22959955 | 0.01890609 | 3 |
| ENSMUSG00000027668 | Mfn1          | 0.31139961 | 3.01E-08   | 4 |
| ENSMUSG00000027673 | Ndufb5        | 0.87400577 | 4.99E-19   | 4 |
| ENSMUSG00000027679 | Dnajc19       | 0.84077677 | 5.61E-14   | 3 |
| ENSMUSG00000027709 | Mccc1         | 0.56442863 | 9.90E-15   | 4 |
| ENSMUSG00000027710 | Acad9         | 0.2911593  | 3.22E-05   | 4 |
| ENSMUSG00000027722 | Spata5        | -0.7097539 | 1.19E-15   | 1 |
| ENSMUSG00000027765 | P2ry1         | -4.9663949 | 1.46E-05   | 2 |
| ENSMUSG00000027770 | Dhx36         | -0.2965812 | 0.02100043 | 2 |
| ENSMUSG00000027774 | Gfm1          | 0.32156767 | 4.38E-15   | 3 |
| ENSMUSG00000027804 | Ppid          | -0.763488  | 3.47E-21   | 1 |
| ENSMUSG00000027809 | Etfdh         | 0.59570235 | 5.73E-20   | 4 |
| ENSMUSG00000027880 | Slc25a54      | 3.31864478 | 0.01565222 | 4 |
| ENSMUSG00000027937 | Jtb           | -0.4209708 | 6.41E-05   | 1 |
| ENSMUSG00000027942 | 4933434E20Rik | -0.6655107 | 1.57E-52   | 1 |
| ENSMUSG00000027944 | Hax1          | -0.7697696 | 4.19E-16   | 1 |
| ENSMUSG00000027983 | Cyp2u1        | 0.80649669 | 1.30E-05   | 3 |
| ENSMUSG00000027984 | Hadh          | 1.39378398 | 3.76E-57   | 4 |
| ENSMUSG00000027994 | Ccdc109b      | 0.2763389  | 4.76E-09   | 3 |
| ENSMUSG00000028013 | Ppa2          | -0.5849049 | 3.89E-06   | 2 |
| ENSMUSG00000028070 | Apoa1bp       | 0.92590603 | 4.77E-48   | 4 |
| ENSMUSG00000028085 | Gatb          | 0.79537319 | 3.07E-18   | 3 |

|                    |          |            |            |   |
|--------------------|----------|------------|------------|---|
| ENSMUSG00000028093 | Acp6     | -0.2100512 | 0.01349059 | 1 |
| ENSMUSG00000028102 | Pex11b   | 0.8296919  | 1.84E-14   | 4 |
| ENSMUSG00000028107 | Tars2    | 0.38503905 | 5.92E-15   | 3 |
| ENSMUSG00000028127 | Abcd3    | 0.25755658 | 0.0003803  | 4 |
| ENSMUSG00000028138 | Adh5     | -0.340066  | 4.22E-06   | 1 |
| ENSMUSG00000028145 | Them4    | -0.3314126 | 0.01694141 | 1 |
| ENSMUSG00000028149 | Rap1gds1 | -0.2432091 | 0.00799404 | 2 |
| ENSMUSG00000028163 | Nfkb1    | -0.530397  | 1.70E-28   | 1 |
| ENSMUSG00000028165 | Cisd2    | -0.2813039 | 1.47E-06   | 1 |
| ENSMUSG00000028186 | Uox      | 1.55475906 | 1.49E-08   | 3 |
| ENSMUSG00000028194 | Ddah1    | 0.26895683 | 0.03506102 | 4 |
| ENSMUSG00000028218 | Fam92a   | 1.18198731 | 2.47E-26   | 4 |
| ENSMUSG00000028223 | Decr1    | 1.27183986 | 7.67E-37   | 4 |
| ENSMUSG00000028228 | Cpne3    | 0.33320388 | 0.00799766 | 3 |
| ENSMUSG00000028229 | Rmdn1    | 0.7731947  | 2.87E-06   | 4 |
| ENSMUSG00000028261 | Ndufaf4  | -0.70437   | 1.13E-15   | 1 |
| ENSMUSG00000028282 | Casp8ap2 | -0.465151  | 1.30E-06   | 2 |
| ENSMUSG00000028292 | Rars2    | 0.48474503 | 1.26E-06   | 4 |
| ENSMUSG00000028330 | Ncbp1    | -0.4475703 | 6.59E-15   | 2 |
| ENSMUSG00000028383 | Hsd12    | 0.87374369 | 1.79E-51   | 4 |
| ENSMUSG00000028398 | Tmem261  | 0.59037489 | 3.87E-15   | 3 |
| ENSMUSG00000028405 | Aco1     | 0.73271261 | 1.96E-48   | 4 |
| ENSMUSG00000028412 | Slc44a1  | 1.10482733 | 2.10E-39   | 3 |
| ENSMUSG00000028416 | Bag1     | 0.27297285 | 0.00472722 | 4 |
| ENSMUSG00000028430 | Nol6     | -0.7461168 | 3.11E-08   | 1 |
| ENSMUSG00000028443 | Nudt2    | 1.19569901 | 5.88E-41   | 4 |

|                    |         |            |            |   |
|--------------------|---------|------------|------------|---|
| ENSMUSG00000028453 | Fancg   | 0.51166504 | 1.34E-08   | 4 |
| ENSMUSG00000028455 | Stoml2  | -0.189253  | 4.70E-05   | 2 |
| ENSMUSG00000028470 | Hint2   | 1.33219733 | 1.86E-14   | 3 |
| ENSMUSG00000028527 | Ak4     | -2.382706  | 1.89E-25   | 2 |
| ENSMUSG00000028603 | Scp2    | 1.33611316 | 2.08E-84   | 4 |
| ENSMUSG00000028607 | Cpt2    | 0.78249867 | 5.25E-33   | 4 |
| ENSMUSG00000028622 | Mrpl37  | 0.25426193 | 1.56E-05   | 4 |
| ENSMUSG00000028648 | Ndufs5  | 0.46933306 | 1.96E-06   | 3 |
| ENSMUSG00000028653 | Trit1   | -0.3946629 | 4.29E-06   | 2 |
| ENSMUSG00000028672 | Hmgcl   | 0.35957232 | 6.48E-05   | 3 |
| ENSMUSG00000028687 | Mutyh   | 0.76776669 | 1.86E-05   | 3 |
| ENSMUSG00000028710 | Atpaf1  | 0.4415772  | 2.71E-08   | 4 |
| ENSMUSG00000028737 | Aldh4a1 | 1.20966333 | 1.96E-25   | 4 |
| ENSMUSG00000028743 | Akr7a5  | 1.03659893 | 0.00293936 | 3 |
| ENSMUSG00000028756 | Pink1   | 1.50919461 | 8.50E-36   | 4 |
| ENSMUSG00000028789 | Azin2   | 1.17932333 | 2.06E-06   | 4 |
| ENSMUSG00000028792 | Ak2     | -0.2365297 | 0.00602831 | 1 |
| ENSMUSG00000028861 | Mrps15  | 0.68786215 | 1.88E-20   | 4 |
| ENSMUSG00000028889 | Yrdc    | -1.2825237 | 3.74E-59   | 1 |
| ENSMUSG00000028910 | Mecr    | 0.27706009 | 8.95E-06   | 3 |
| ENSMUSG00000028914 | Casp9   | 0.7509875  | 1.60E-16   | 4 |
| ENSMUSG00000028953 | Abcf2   | -0.8740208 | 0          | 1 |
| ENSMUSG00000028964 | Park7   | 1.33731281 | 1.44E-97   | 4 |
| ENSMUSG00000028970 | Abcb1b  | 0.30269226 | 7.80E-06   | 3 |
| ENSMUSG00000028973 | Abcb8   | 0.58244409 | 0.01115996 | 3 |
| ENSMUSG00000028978 | Nos3    | 3.07847548 | 0.00019969 | 3 |



|                    |          |            |            |   |
|--------------------|----------|------------|------------|---|
| ENSMUSG00000028980 | H6pd     | 0.50378357 | 1.64E-07   | 3 |
| ENSMUSG00000028982 | Slc25a33 | -0.9160017 | 2.13E-42   | 1 |
| ENSMUSG00000028998 | Tomm7    | 0.46073166 | 5.81E-05   | 3 |
| ENSMUSG00000029017 | Pmpcb    | 0.24149447 | 0.00021935 | 4 |
| ENSMUSG00000029020 | Mfn2     | 0.60322288 | 1.30E-36   | 4 |
| ENSMUSG00000029036 | Atad3a   | -0.5532717 | 2.07E-11   | 1 |
| ENSMUSG00000029098 | Acox3    | 1.31174457 | 1.25E-48   | 4 |
| ENSMUSG00000029167 | Ppargc1a | 1.47362234 | 1.32E-80   | 3 |
| ENSMUSG00000029198 | Grpel1   | -0.1298453 | 0.00980107 | 1 |
| ENSMUSG00000029199 | Lias     | 0.42225747 | 1.84E-07   | 4 |
| ENSMUSG00000029208 | Guf1     | 1.03215387 | 3.57E-46   | 4 |
| ENSMUSG00000029310 | Nudt9    | -0.4731978 | 1.83E-10   | 1 |
| ENSMUSG00000029366 | Dck      | 0.34508386 | 1.63E-05   | 4 |
| ENSMUSG00000029376 | Mthfd2l  | 0.32806571 | 0.0084873  | 3 |
| ENSMUSG00000029432 | Gbas     | 0.940802   | 3.58E-64   | 4 |
| ENSMUSG00000029433 | Diablo   | 0.37022238 | 1.59E-10   | 4 |
| ENSMUSG00000029455 | Aldh2    | 1.31584999 | 2.13E-09   | 4 |
| ENSMUSG00000029456 | Acad10   | 1.5284443  | 1.80E-16   | 4 |
| ENSMUSG00000029486 | Mrpl1    | -0.427353  | 1.94E-08   | 1 |
| ENSMUSG00000029499 | Pxmp2    | 1.63194195 | 1.37E-10   | 4 |
| ENSMUSG00000029500 | Pgam5    | -0.4776371 | 1.62E-14   | 1 |
| ENSMUSG00000029507 | Pus1     | -0.8316885 | 1.40E-22   | 1 |
| ENSMUSG00000029524 | Sirt4    | 0.68230027 | 1.82E-15   | 3 |
| ENSMUSG00000029535 | Triap1   | 0.64214668 | 1.91E-26   | 4 |
| ENSMUSG00000029536 | Gatc     | 0.29133206 | 6.92E-05   | 4 |
| ENSMUSG00000029545 | Acads    | 1.48623624 | 1.19E-07   | 4 |

|                    |           |            |            |   |
|--------------------|-----------|------------|------------|---|
| ENSMUSG00000029557 | Ftsj2     | 0.81244905 | 3.88E-07   | 3 |
| ENSMUSG00000029575 | Mmab      | 2.10142467 | 5.95E-183  | 4 |
| ENSMUSG00000029591 | Ung       | -0.9335967 | 1.09E-38   | 1 |
| ENSMUSG00000029592 | Usp30     | 0.15650497 | 0.02188428 | 4 |
| ENSMUSG00000029596 | Sdsl      | 5.5840927  | 3.03E-19   | 3 |
| ENSMUSG00000029624 | Ptcd1     | -0.3819728 | 0.00135361 | 1 |
| ENSMUSG00000029632 | Ndufa4    | 0.77706354 | 8.20E-22   | 4 |
| ENSMUSG00000029762 | Akr1b8    | 0.72545287 | 6.09E-25   | 3 |
| ENSMUSG00000029769 | Ccdc136   | 1.4449731  | 4.46E-112  | 3 |
| ENSMUSG00000029776 | Hibadh    | 0.55938432 | 1.27E-18   | 4 |
| ENSMUSG00000029777 | Gars      | -1.0316146 | 9.09E-29   | 1 |
| ENSMUSG00000029802 | Abcg2     | 1.82502494 | 1.80E-52   | 4 |
| ENSMUSG00000029815 | Malsu1    | 0.45499346 | 0.00557275 | 3 |
| ENSMUSG00000029863 | Casp2     | -0.6170153 | 2.94E-21   | 2 |
| ENSMUSG00000029864 | Gstk1     | -4.8137488 | 0.01781269 | 2 |
| ENSMUSG00000029911 | Ssbp1     | 0.31140374 | 0.00239855 | 3 |
| ENSMUSG00000029918 | Mrps33    | 0.78683239 | 4.20E-14   | 3 |
| ENSMUSG00000029993 | Nfu1      | 1.03188098 | 4.08E-40   | 4 |
| ENSMUSG00000030007 | Cct7      | -0.4614129 | 2.26E-14   | 2 |
| ENSMUSG00000030086 | Chchd6    | 1.17627322 | 5.65E-23   | 4 |
| ENSMUSG00000030088 | Aldh1l1   | 4.73321147 | 0.00015701 | 4 |
| ENSMUSG00000030161 | Gabarapl1 | -1.1853669 | 2.99E-285  | 1 |
| ENSMUSG00000030246 | Ldhb      | -1.8284367 | 7.20E-141  | 2 |
| ENSMUSG00000030265 | Kras      | -0.2760906 | 0.00597364 | 2 |
| ENSMUSG00000030268 | Bcat1     | -1.1313565 | 8.69E-92   | 2 |
| ENSMUSG00000030309 | Caprin2   | 0.89846487 | 4.70E-10   | 4 |

|                    |          |            |            |   |
|--------------------|----------|------------|------------|---|
| ENSMUSG00000030337 | Vamp1    | 1.55850192 | 2.59E-17   | 4 |
| ENSMUSG00000030357 | Fkbp4    | -0.5163943 | 1.41E-13   | 2 |
| ENSMUSG00000030376 | Slc8a2   | -2.3431004 | 0.0089541  | 2 |
| ENSMUSG00000030409 | Dmpk     | 3.04157252 | 7.39E-110  | 3 |
| ENSMUSG00000030421 | Uri1     | -0.8309796 | 1.94E-43   | 1 |
| ENSMUSG00000030451 | Herc2    | -0.6028514 | 1.82E-22   | 2 |
| ENSMUSG00000030541 | Idh2     | 0.95529992 | 2.86E-35   | 4 |
| ENSMUSG00000030559 | Rab38    | -4.7088903 | 0.00147301 | 2 |
| ENSMUSG00000030562 | Nox4     | 5.27840495 | 6.68E-40   | 4 |
| ENSMUSG00000030612 | Mrpl46   | -0.4300557 | 0.00178885 | 1 |
| ENSMUSG00000030613 | Ccdc90b  | 0.83092521 | 8.96E-07   | 4 |
| ENSMUSG00000030615 | Tmem126a | -0.8479744 | 2.06E-31   | 1 |
| ENSMUSG00000030621 | Me3      | 2.75966825 | 8.07E-16   | 4 |
| ENSMUSG00000030652 | Coq7     | 0.3677192  | 0.00095427 | 3 |
| ENSMUSG00000030653 | Pde2a    | 3.335562   | 2.87E-65   | 3 |
| ENSMUSG00000030725 | Lipt2    | -0.4252821 | 0.0361974  | 1 |
| ENSMUSG00000030744 | Rps3     | -0.5445486 | 4.73E-15   | 1 |
| ENSMUSG00000030747 | Dgat2    | -1.0472218 | 2.29E-54   | 1 |
| ENSMUSG00000030802 | Bckdk    | 0.41449499 | 1.07E-08   | 3 |
| ENSMUSG00000030869 | Ndufab1  | -0.3304297 | 1.70E-05   | 1 |
| ENSMUSG00000030871 | Ears2    | -1.1561828 | 1.28E-40   | 1 |
| ENSMUSG00000030879 | Mrpl17   | -0.5316296 | 1.76E-10   | 1 |
| ENSMUSG00000030894 | Tpp1     | -0.1188222 | 0.01358564 | 3 |
| ENSMUSG00000030934 | Oat      | -0.2008204 | 0.00223415 | 3 |
| ENSMUSG00000030986 | Dhx32    | 0.33765702 | 0.00010541 | 4 |
| ENSMUSG00000031059 | Ndufb11  | 1.05378285 | 1.51E-20   | 3 |

|                    |         |            |            |   |
|--------------------|---------|------------|------------|---|
| ENSMUSG00000031158 | Timm17b | 0.52839205 | 0.00182609 | 3 |
| ENSMUSG00000031198 | Fundc2  | 0.60012959 | 2.97E-07   | 4 |
| ENSMUSG00000031200 | Mtcp1   | 1.02605988 | 0.00013375 | 4 |
| ENSMUSG00000031278 | Acs14   | -0.6122021 | 8.40E-15   | 1 |
| ENSMUSG00000031299 | Pdha1   | 0.33243734 | 1.29E-10   | 4 |
| ENSMUSG00000031333 | Abcb7   | 0.30015078 | 3.21E-05   | 4 |
| ENSMUSG00000031352 | Hccs    | -0.7638478 | 1.19E-41   | 1 |
| ENSMUSG00000031360 | Ctps2   | 0.99766336 | 6.80E-35   | 3 |
| ENSMUSG00000031373 | Car5b   | 3.08220499 | 1.21E-293  | 4 |
| ENSMUSG00000031378 | Abcd1   | 0.52306065 | 0.00221805 | 4 |
| ENSMUSG00000031467 | Agpat5  | -0.3625836 | 5.47E-10   | 1 |
| ENSMUSG00000031485 | Prosc   | -0.3012751 | 1.85E-16   | 1 |
| ENSMUSG00000031516 | Dctn6   | 0.2343154  | 0.04659466 | 4 |
| ENSMUSG00000031533 | Mrps31  | -0.4184116 | 3.27E-08   | 1 |
| ENSMUSG00000031574 | Star    | -0.4529382 | 0.00386067 | 2 |
| ENSMUSG00000031584 | Gsr     | 0.41971887 | 1.39E-20   | 4 |
| ENSMUSG00000031633 | Slc25a4 | 1.01233242 | 1.11E-21   | 4 |
| ENSMUSG00000031641 | Cbr4    | 1.20818062 | 1.41E-17   | 4 |
| ENSMUSG00000031672 | Got2    | 0.37343376 | 8.21E-43   | 3 |
| ENSMUSG00000031700 | Gpt2    | -0.7901271 | 4.67E-19   | 1 |
| ENSMUSG00000031710 | Ucp1    | -5.7120613 | 0.00050464 | 1 |
| ENSMUSG00000031730 | Dhodh   | 0.75931432 | 5.11E-08   | 3 |
| ENSMUSG00000031740 | Mmp2    | -2.5744537 | 0          | 1 |
| ENSMUSG00000031776 | Arl2bp  | 0.96129898 | 2.57E-88   | 4 |
| ENSMUSG00000031781 | Ciapin1 | -0.1776241 | 3.87E-06   | 3 |
| ENSMUSG00000031782 | Coq9    | 0.83586602 | 6.67E-49   | 3 |

|                    |         |            |            |   |
|--------------------|---------|------------|------------|---|
| ENSMUSG00000031808 | Slc27a1 | 1.12518705 | 5.45E-05   | 3 |
| ENSMUSG00000031818 | Cox4i1  | 0.63757664 | 1.47E-05   | 3 |
| ENSMUSG00000031819 | Emc8    | 0.26490687 | 4.60E-05   | 3 |
| ENSMUSG00000031901 | Dus2    | 0.79289145 | 5.20E-27   | 3 |
| ENSMUSG00000031903 | Pla2g15 | 0.85375304 | 5.58E-29   | 3 |
| ENSMUSG00000031924 | Cyb5b   | 0.5548069  | 2.03E-20   | 3 |
| ENSMUSG00000031958 | Ldhd    | 2.30582021 | 5.53E-06   | 3 |
| ENSMUSG00000031960 | Aars    | -0.2548883 | 0.0001925  | 1 |
| ENSMUSG00000031967 | Afg3l1  | 0.20557799 | 0.00215699 | 4 |
| ENSMUSG00000031969 | Acad8   | 0.28862522 | 4.56E-05   | 4 |
| ENSMUSG00000031974 | Abcb10  | 1.53072312 | 5.00E-190  | 4 |
| ENSMUSG00000031985 | Gnpat   | 1.22534336 | 1.69E-92   | 4 |
| ENSMUSG00000032040 | Dcps    | -0.4429055 | 2.32E-12   | 2 |
| ENSMUSG00000032044 | Rpusd4  | -0.2914563 | 0.00052387 | 2 |
| ENSMUSG00000032046 | Abhd12  | 0.47624777 | 3.94E-27   | 3 |
| ENSMUSG00000032047 | Acat1   | 0.86255888 | 8.97E-19   | 4 |
| ENSMUSG00000032051 | Fdx1    | -0.804915  | 8.72E-13   | 1 |
| ENSMUSG00000032060 | Cryab   | 4.1331507  | 0          | 4 |
| ENSMUSG00000032067 | Pts     | 0.81247356 | 8.50E-08   | 2 |
| ENSMUSG00000032097 | Ddx6    | -0.2827372 | 0.00405068 | 2 |
| ENSMUSG00000032118 | Fez1    | -4.4266115 | 5.55E-52   | 2 |
| ENSMUSG00000032178 | Ilf3    | -0.1894069 | 0.00047487 | 2 |
| ENSMUSG00000032194 | Kank2   | 0.47860537 | 0.00018485 | 4 |
| ENSMUSG00000032263 | Bckdhb  | 1.40632603 | 1.00E-64   | 4 |
| ENSMUSG00000032293 | Ireb2   | -0.4909126 | 4.36E-06   | 2 |
| ENSMUSG00000032294 | Pkm     | 0.48399366 | 4.82E-05   | 3 |

|                    |         |            |            |   |
|--------------------|---------|------------|------------|---|
| ENSMUSG00000032314 | Etfa    | 0.47921318 | 2.22E-07   | 4 |
| ENSMUSG00000032330 | Cox7a2  | 0.47031677 | 7.73E-07   | 4 |
| ENSMUSG00000032348 | Gsta4   | 3.75263021 | 6.99E-257  | 4 |
| ENSMUSG00000032370 | Lactb   | 1.37952848 | 1.37E-41   | 4 |
| ENSMUSG00000032418 | Me1     | 1.66788933 | 1.32E-119  | 4 |
| ENSMUSG00000032459 | Mrps22  | -0.4754121 | 1.05E-12   | 2 |
| ENSMUSG00000032527 | Pccb    | 1.29764598 | 7.66E-23   | 4 |
| ENSMUSG00000032607 | Amt     | 1.35362461 | 6.55E-17   | 4 |
| ENSMUSG00000032667 | Pon2    | 0.62172023 | 2.22E-25   | 4 |
| ENSMUSG00000032705 | Exd2    | 0.43959797 | 0.00050397 | 4 |
| ENSMUSG00000032754 | Slc8b1  | 0.77940407 | 3.44E-11   | 3 |
| ENSMUSG00000032786 | Alas1   | 0.46491903 | 0.00025019 | 3 |
| ENSMUSG00000032826 | Ank2    | -3.4275804 | 3.75E-205  | 1 |
| ENSMUSG00000032841 | Prr5l   | -2.3264365 | 1.51E-100  | 1 |
| ENSMUSG00000032860 | P2ry2   | -2.363209  | 6.30E-73   | 1 |
| ENSMUSG00000032883 | Acs13   | 0.46875811 | 2.90E-18   | 3 |
| ENSMUSG00000032902 | Slc16a1 | -0.6064736 | 2.29E-34   | 1 |
| ENSMUSG00000032959 | Pebp1   | 0.22183446 | 0.00353954 | 3 |
| ENSMUSG00000033126 | Ybey    | 0.40632134 | 0.00099906 | 4 |
| ENSMUSG00000033157 | Abhd10  | -0.5623193 | 1.30E-09   | 1 |
| ENSMUSG00000033216 | Eefsec  | 0.2404063  | 0.03678986 | 3 |
| ENSMUSG00000033429 | Mcee    | 0.70801102 | 0.01426061 | 4 |
| ENSMUSG00000033436 | Armxcx2 | 1.07086084 | 2.84E-69   | 4 |
| ENSMUSG00000033491 | Prss35  | 2.86969053 | 2.54E-12   | 3 |
| ENSMUSG00000033538 | Casp4   | 0.43775613 | 9.69E-15   | 3 |
| ENSMUSG00000033624 | Pdpr    | 0.81241498 | 9.62E-08   | 4 |

|                    |            |            |            |   |
|--------------------|------------|------------|------------|---|
| ENSMUSG00000033685 | Ucp2       | 0.704339   | 1.51E-06   | 3 |
| ENSMUSG00000033720 | Sfxn5      | 0.96018835 | 2.94E-28   | 3 |
| ENSMUSG00000033735 | Spr        | 0.96720139 | 3.25E-13   | 3 |
| ENSMUSG00000033751 | Gadd45gip1 | 0.60463087 | 1.13E-06   | 3 |
| ENSMUSG00000033845 | Mrpl15     | -0.5758282 | 4.06E-27   | 2 |
| ENSMUSG00000033918 | Parl       | -0.2262404 | 0.00486591 | 1 |
| ENSMUSG00000033933 | Vhl        | -0.5016409 | 3.55E-17   | 2 |
| ENSMUSG00000034156 | Bzrap1     | 4.25646125 | 3.74E-34   | 4 |
| ENSMUSG00000034173 | Zbed5      | -0.457205  | 8.46E-06   | 1 |
| ENSMUSG00000034203 | Chchd4     | -0.9972687 | 1.24E-48   | 1 |
| ENSMUSG00000034248 | Slc25a37   | -1.3065109 | 1.97E-130  | 1 |
| ENSMUSG00000034285 | Nipsnap1   | 2.86532599 | 3.94E-57   | 4 |
| ENSMUSG00000034424 | Gcsh       | 0.25808547 | 0.00439829 | 4 |
| ENSMUSG00000034442 | Trmt5      | -0.3320854 | 0.00378787 | 2 |
| ENSMUSG00000034613 | Ppm1h      | -1.4916088 | 3.38E-68   | 3 |
| ENSMUSG00000034708 | Grn        | 0.47311644 | 1.09E-10   | 3 |
| ENSMUSG00000034729 | Mrps10     | -0.259763  | 0.00028106 | 1 |
| ENSMUSG00000034853 | Acot11     | 1.44301864 | 0.00524895 | 4 |
| ENSMUSG00000034875 | Nudt19     | -0.4551408 | 0.0001672  | 2 |
| ENSMUSG00000035069 | Oma1       | 1.43441636 | 2.10E-18   | 4 |
| ENSMUSG00000035131 | Brinp3     | -3.1565609 | 7.31E-07   | 1 |
| ENSMUSG00000035139 | Secisbp2   | -0.3898701 | 2.10E-10   | 1 |
| ENSMUSG00000035142 | Nubpl      | 1.44047295 | 1.95E-19   | 4 |
| ENSMUSG00000035232 | Pdk3       | 0.54716223 | 2.53E-11   | 4 |
| ENSMUSG00000035517 | Tdrd7      | 0.75866577 | 2.93E-25   | 4 |
| ENSMUSG00000035559 | Mpv17l2    | 0.91166798 | 2.61E-33   | 3 |

|                    |         |            |            |   |
|--------------------|---------|------------|------------|---|
| ENSMUSG00000035666 | Gtf3c4  | -0.4800084 | 8.01E-08   | 2 |
| ENSMUSG00000035674 | Ndufa3  | 0.56683752 | 6.57E-09   | 3 |
| ENSMUSG00000035772 | Mrps2   | -0.4957171 | 2.85E-21   | 1 |
| ENSMUSG00000035824 | Tk2     | 0.29251115 | 0.00127645 | 3 |
| ENSMUSG00000035885 | Cox8a   | 0.64891676 | 0.00016049 | 3 |
| ENSMUSG00000035891 | Cerk    | 1.06742875 | 7.96E-67   | 3 |
| ENSMUSG00000035900 | Gramd4  | -0.8307862 | 1.06E-11   | 1 |
| ENSMUSG00000035936 | Aldh5a1 | 1.8566203  | 1.69E-23   | 4 |
| ENSMUSG00000035960 | Apex1   | -0.7686883 | 2.16E-08   | 1 |
| ENSMUSG00000036138 | Acaa1a  | 0.95872139 | 7.19E-07   | 3 |
| ENSMUSG00000036199 | Ndufa13 | 1.05567662 | 0.00040603 | 3 |
| ENSMUSG00000036257 | Pnpla8  | -0.2907833 | 2.33E-07   | 1 |
| ENSMUSG00000036273 | Lrrk2   | -1.3228003 | 1.86E-42   | 2 |
| ENSMUSG00000036278 | Macrodl | 0.63911716 | 1.79E-12   | 3 |
| ENSMUSG00000036285 | Noa1    | -0.3484158 | 3.82E-09   | 1 |
| ENSMUSG00000036353 | P2ry12  | 2.63821508 | 0.01950432 | 3 |
| ENSMUSG00000036438 | Calm2   | 0.44666436 | 1.67E-06   | 4 |
| ENSMUSG00000036555 | Iqce    | 0.74952057 | 1.42E-31   | 4 |
| ENSMUSG00000036564 | Ndrp4   | 2.35995596 | 5.20E-79   | 4 |
| ENSMUSG00000036580 | Spg20   | 0.58854181 | 7.53E-41   | 4 |
| ENSMUSG00000036639 | Nudt1   | 1.24206198 | 3.46E-29   | 4 |
| ENSMUSG00000036698 | Ago2    | -0.3339651 | 0.00089367 | 2 |
| ENSMUSG00000036835 | Psenen  | -0.4608824 | 8.01E-11   | 1 |
| ENSMUSG00000036850 | Mrpl41  | 0.78965467 | 4.48E-16   | 3 |
| ENSMUSG00000036880 | Acaa2   | 0.20258058 | 0.00779152 | 4 |
| ENSMUSG00000036932 | Aifm1   | 0.62813438 | 2.45E-36   | 4 |



|                    |               |            |            |   |
|--------------------|---------------|------------|------------|---|
| ENSMUSG00000036943 | Rab8b         | -0.5257014 | 3.37E-10   | 2 |
| ENSMUSG00000036955 | Kif1bp        | -0.1259549 | 0.04382599 | 2 |
| ENSMUSG00000036975 | Tmem177       | 0.46306918 | 7.59E-08   | 4 |
| ENSMUSG00000036983 | Tfb1m         | 0.64484572 | 5.07E-11   | 4 |
| ENSMUSG00000037012 | Hk1           | 0.80862062 | 5.16E-25   | 4 |
| ENSMUSG00000037022 | Mmaa          | 1.19187059 | 1.03E-11   | 4 |
| ENSMUSG00000037152 | Ndufc1        | 0.78450944 | 2.13E-16   | 3 |
| ENSMUSG00000037196 | Pacrg         | 4.5585425  | 0.00323174 | 4 |
| ENSMUSG00000037242 | Clic4         | -0.8684217 | 4.24E-46   | 1 |
| ENSMUSG00000037353 | Letmd1        | 1.45820084 | 1.39E-80   | 4 |
| ENSMUSG00000037499 | Nenf          | 1.50720864 | 3.49E-31   | 3 |
| ENSMUSG00000037514 | Pank2         | 0.19025214 | 0.03403267 | 3 |
| ENSMUSG00000037531 | Mrpl47        | -0.3052885 | 1.53E-05   | 1 |
| ENSMUSG00000037601 | Nme1          | -0.5657166 | 9.31E-09   | 2 |
| ENSMUSG00000037636 | Slc25a43      | 2.86857516 | 4.63E-15   | 4 |
| ENSMUSG00000037710 | Cisd1         | -0.2142706 | 0.03107385 | 1 |
| ENSMUSG00000037747 | Phyhipl       | -6.7032427 | 5.24E-07   | 2 |
| ENSMUSG00000037787 | Apopt1        | 0.62203952 | 2.46E-13   | 4 |
| ENSMUSG00000037805 | Rpl10a        | -0.5019713 | 1.85E-08   | 1 |
| ENSMUSG00000037820 | Tgm2          | 2.48569899 | 1.15E-142  | 4 |
| ENSMUSG00000037826 | Ppm1k         | 0.8679854  | 1.79E-16   | 3 |
| ENSMUSG00000037860 | Aim2          | 4.77810464 | 5.32E-17   | 3 |
| ENSMUSG00000037916 | Ndufv1        | 0.37511328 | 0.0217821  | 3 |
| ENSMUSG00000037938 | Chchd5        | 0.4829639  | 0.00137483 | 3 |
| ENSMUSG00000037960 | 1110007C09Rik | 1.48662168 | 1.61E-08   | 4 |
| ENSMUSG00000037972 | Snn           | 0.40831775 | 3.84E-19   | 4 |

|                    |         |            |            |   |
|--------------------|---------|------------|------------|---|
| ENSMUSG00000038028 | Tigar   | -0.3225951 | 0.0033766  | 2 |
| ENSMUSG00000038046 | Rnmt1l  | -0.8414181 | 3.93E-24   | 1 |
| ENSMUSG00000038068 | Rnf144b | -1.5911248 | 0.00026095 | 2 |
| ENSMUSG00000038121 | Fam210a | -0.4357278 | 3.42E-13   | 2 |
| ENSMUSG00000038195 | Rilp    | 1.84330217 | 1.92E-06   | 3 |
| ENSMUSG00000038225 | Primpol | 0.39550681 | 0.00024513 | 3 |
| ENSMUSG00000038286 | Bphl    | 2.86484138 | 4.32E-34   | 4 |
| ENSMUSG00000038342 | Mlxip   | -0.2376118 | 0.02991907 | 2 |
| ENSMUSG00000038393 | Txnip   | 1.21129852 | 2.30E-32   | 4 |
| ENSMUSG00000038422 | Hdhd3   | 0.94208649 | 5.35E-12   | 3 |
| ENSMUSG00000038518 | Jarid2  | -0.7056703 | 5.41E-15   | 1 |
| ENSMUSG00000038567 | Cyp24a1 | 4.40569671 | 9.09E-39   | 3 |
| ENSMUSG00000038582 | Pptc7   | -0.2258649 | 0.03921359 | 1 |
| ENSMUSG00000038612 | Mcl1    | -0.7197058 | 2.92E-15   | 1 |
| ENSMUSG00000038633 | Degs1   | -1.2659496 | 8.97E-154  | 1 |
| ENSMUSG00000038690 | Atp5j2  | 0.30457865 | 0.00038765 | 3 |
| ENSMUSG00000038733 | Wdr26   | 0.25382029 | 0.01758899 | 4 |
| ENSMUSG00000038780 | Smurf1  | -1.3778502 | 3.17E-91   | 1 |
| ENSMUSG00000038845 | Phb     | -0.6478195 | 9.77E-19   | 2 |
| ENSMUSG00000038872 | Zfhx3   | 0.80314914 | 3.40E-10   | 4 |
| ENSMUSG00000038880 | Mrps34  | 0.56892022 | 1.02E-08   | 3 |
| ENSMUSG00000038888 | Ctu1    | -1.2181797 | 1.43E-29   | 1 |
| ENSMUSG00000038936 | Sccpdh  | 1.21000819 | 2.45E-54   | 4 |
| ENSMUSG00000038967 | Pdk2    | 1.435031   | 7.62E-19   | 4 |
| ENSMUSG00000039018 | Mtg1    | 0.79284126 | 2.31E-08   | 4 |
| ENSMUSG00000039048 | Foxred1 | -0.2024439 | 0.04033297 | 1 |

|                    |               |            |            |   |
|--------------------|---------------|------------|------------|---|
| ENSMUSG00000039063 | Echdc3        | 3.69703941 | 6.75E-75   | 4 |
| ENSMUSG00000039065 | Fam173b       | 0.42425346 | 1.89E-06   | 3 |
| ENSMUSG00000039069 | Mtg2          | 0.76168046 | 6.08E-17   | 4 |
| ENSMUSG00000039163 | Cmc1          | 0.71492162 | 4.47E-18   | 3 |
| ENSMUSG00000039176 | Polg          | -0.4596259 | 3.01E-06   | 1 |
| ENSMUSG00000039275 | Foxk2         | -0.2076854 | 1.42E-05   | 1 |
| ENSMUSG00000039457 | Ppl           | -0.8804632 | 0.00072691 | 2 |
| ENSMUSG00000039477 | Tnrc18        | 1.063436   | 0.00988188 | 4 |
| ENSMUSG00000039478 | Micu3         | -0.4283255 | 3.54E-05   | 2 |
| ENSMUSG00000039530 | Tusc3         | 0.87957212 | 9.92E-22   | 4 |
| ENSMUSG00000039646 | Vasn          | -0.7721112 | 0.00418211 | 1 |
| ENSMUSG00000039648 | Ccb11         | 0.90243712 | 0.0001248  | 3 |
| ENSMUSG00000039670 | Oxld1         | 0.74593064 | 4.35E-05   | 3 |
| ENSMUSG00000039680 | Mrps6         | 0.57659755 | 4.38E-11   | 3 |
| ENSMUSG00000039682 | Lap3          | -0.1442387 | 8.25E-07   | 2 |
| ENSMUSG00000039768 | Dnajc11       | -0.3528495 | 3.23E-07   | 1 |
| ENSMUSG00000039826 | Trub2         | -0.2466815 | 0.00495893 | 2 |
| ENSMUSG00000039958 | Mettl20       | 1.23275133 | 1.05E-06   | 3 |
| ENSMUSG00000040018 | Cox15         | 0.40317333 | 1.59E-16   | 4 |
| ENSMUSG00000040048 | Ndufb10       | 0.64143654 | 2.54E-11   | 3 |
| ENSMUSG00000040136 | Abcc8         | -3.4545992 | 2.45E-05   | 2 |
| ENSMUSG00000040177 | 2310057M21Rik | -1.3736    | 5.69E-67   | 1 |
| ENSMUSG00000040213 | Ccb12         | -0.8055448 | 1.50E-06   | 2 |
| ENSMUSG00000040265 | Dnm3          | 2.56528565 | 0.00095531 | 4 |
| ENSMUSG00000040269 | Mrps28        | 0.2822656  | 0.00051698 | 3 |
| ENSMUSG00000040322 | Slc25a24      | 0.53914025 | 2.26E-19   | 4 |

|                    |               |            |            |   |
|--------------------|---------------|------------|------------|---|
| ENSMUSG00000040354 | Mars          | -0.5044405 | 8.38E-27   | 1 |
| ENSMUSG00000040370 | Lyrm5         | 0.74732174 | 1.47E-15   | 4 |
| ENSMUSG00000040410 | Fbx14         | 0.30760535 | 0.01071009 | 3 |
| ENSMUSG00000040435 | Ppp1r15a      | -2.3471009 | 0          | 1 |
| ENSMUSG00000040459 | Arglu1        | 0.29592995 | 6.85E-05   | 4 |
| ENSMUSG00000040464 | Gtpbp10       | -1.4164989 | 1.59E-48   | 1 |
| ENSMUSG00000040483 | Xaf1          | -3.9171127 | 5.67E-74   | 3 |
| ENSMUSG00000040506 | Ambra1        | -0.5603716 | 5.47E-16   | 1 |
| ENSMUSG00000040532 | Abhd11        | -0.3808721 | 0.00015512 | 1 |
| ENSMUSG00000040618 | Pck2          | -1.0440949 | 1.51E-16   | 1 |
| ENSMUSG00000040675 | Mthfd11       | -1.5315066 | 1.06E-176  | 1 |
| ENSMUSG00000040740 | Slc25a34      | -2.6255209 | 0.00190256 | 3 |
| ENSMUSG00000040820 | Hlcs          | 0.56483803 | 0.00016749 | 4 |
| ENSMUSG00000040822 | 1700123O20Rik | -0.8278293 | 1.01E-45   | 2 |
| ENSMUSG00000040888 | Gfer          | -0.4303721 | 2.15E-07   | 1 |
| ENSMUSG00000041028 | Ghitm         | -0.9939513 | 4.14E-60   | 1 |
| ENSMUSG00000041064 | Pif1          | 2.21047947 | 2.87E-40   | 4 |
| ENSMUSG00000041135 | Ripk2         | -0.3046633 | 0.00242763 | 2 |
| ENSMUSG00000041328 | Pcf11         | -1.09356   | 2.08E-69   | 1 |
| ENSMUSG00000041426 | Hibch         | 0.66349845 | 1.33E-09   | 4 |
| ENSMUSG00000041431 | Ccnb1         | 0.21876391 | 0.03377568 | 2 |
| ENSMUSG00000041440 | Gk5           | -0.3562384 | 0.00995182 | 2 |
| ENSMUSG00000041632 | Mrps27        | -0.3220639 | 0.012111   | 1 |
| ENSMUSG00000041697 | Cox6a1        | 0.76206075 | 0.00524493 | 3 |
| ENSMUSG00000041736 | Tspo          | 1.3819694  | 0.00258238 | 3 |
| ENSMUSG00000041797 | Abca9         | -2.3306877 | 0.00092223 | 2 |

|                    |         |            |            |   |
|--------------------|---------|------------|------------|---|
| ENSMUSG00000041886 | Macc1   | 7.91495959 | 1.08E-09   | 4 |
| ENSMUSG00000041912 | Tdrkh   | 2.92619729 | 5.71E-80   | 4 |
| ENSMUSG00000041921 | Metap1d | 0.83876781 | 9.43E-50   | 4 |
| ENSMUSG00000042010 | Acacb   | 1.69273087 | 1.55E-34   | 3 |
| ENSMUSG00000042082 | Arsb    | 0.73407894 | 2.15E-25   | 4 |
| ENSMUSG00000042148 | Cox10   | -0.3667434 | 0.00655391 | 1 |
| ENSMUSG00000042198 | Chchd7  | 0.71529344 | 1.42E-11   | 3 |
| ENSMUSG00000042228 | Lyn     | -0.4019676 | 0.01700975 | 3 |
| ENSMUSG00000042298 | Ttc19   | -0.197687  | 0.00224982 | 2 |
| ENSMUSG00000042349 | Ikbke   | 1.32766765 | 7.73E-50   | 3 |
| ENSMUSG00000042410 | Agps    | -0.4021353 | 0.00025194 | 2 |
| ENSMUSG00000042462 | Dctpp1  | -0.8731704 | 4.74E-09   | 1 |
| ENSMUSG00000042505 | Sdhaf3  | 0.89243084 | 4.55E-05   | 4 |
| ENSMUSG00000042622 | Maff    | -1.8275506 | 6.23E-220  | 1 |
| ENSMUSG00000042626 | Shc1    | -0.176948  | 9.21E-05   | 1 |
| ENSMUSG00000042647 | Acad12  | 1.86666682 | 1.81E-17   | 4 |
| ENSMUSG00000042670 | Imp11   | 0.40369345 | 0.0099624  | 4 |
| ENSMUSG00000042709 | Atpaf2  | 0.24217903 | 0.03094444 | 4 |
| ENSMUSG00000042770 | Hebp1   | 0.34925198 | 0.00199662 | 3 |
| ENSMUSG00000043140 | Tmem186 | -0.28447   | 0.00026615 | 1 |
| ENSMUSG00000043162 | Pyurf   | 1.33604266 | 1.44E-27   | 3 |
| ENSMUSG00000043284 | Tmem11  | -1.294892  | 1.88E-74   | 1 |
| ENSMUSG00000043411 | Usp48   | 0.30728567 | 0.00172325 | 4 |
| ENSMUSG00000043510 | Hscb    | 1.49111619 | 1.03E-51   | 3 |
| ENSMUSG00000043613 | Mmp3    | -4.8756371 | 0          | 1 |
| ENSMUSG00000043702 | Pde12   | -0.4936079 | 9.91E-10   | 2 |

|                    |          |            |            |   |
|--------------------|----------|------------|------------|---|
| ENSMUSG00000043733 | Ptpn11   | -0.3802104 | 1.51E-20   | 2 |
| ENSMUSG00000044005 | Gls2     | -0.3800964 | 0.0126036  | 2 |
| ENSMUSG00000044018 | Mrpl50   | -0.8257289 | 5.33E-16   | 1 |
| ENSMUSG00000044221 | Grsf1    | -0.4155672 | 1.06E-06   | 2 |
| ENSMUSG00000044288 | Cnr1     | -6.8369169 | 5.75E-07   | 1 |
| ENSMUSG00000044763 | Trmt10c  | -1.3145489 | 2.25E-52   | 1 |
| ENSMUSG00000044783 | Hjrup    | -0.1389084 | 0.01498139 | 2 |
| ENSMUSG00000044792 | Isca1    | -0.4825032 | 5.76E-09   | 1 |
| ENSMUSG00000045160 | Bola3    | 0.4990768  | 8.20E-06   | 3 |
| ENSMUSG00000045316 | Fahd1    | 0.32724704 | 0.00137337 | 3 |
| ENSMUSG00000045409 | Trim39   | -0.3800299 | 1.21E-06   | 2 |
| ENSMUSG00000045438 | Cox19    | 0.63293059 | 2.68E-07   | 4 |
| ENSMUSG00000045636 | Mtus1    | 1.7065927  | 2.21E-74   | 3 |
| ENSMUSG00000045854 | Lyrn2    | 1.20058183 | 4.96E-14   | 4 |
| ENSMUSG00000045973 | Slc25a51 | -0.1433302 | 0.00149548 | 1 |
| ENSMUSG00000046329 | Slc25a23 | 1.52321067 | 2.61E-62   | 3 |
| ENSMUSG00000046442 | Ppm1e    | 1.21672876 | 3.22E-19   | 4 |
| ENSMUSG00000046573 | Lyrn4    | 0.74416957 | 0.00038051 | 3 |
| ENSMUSG00000046598 | Bdh1     | -9.599216  | 8.89E-15   | 2 |
| ENSMUSG00000046603 | Tcaim    | 0.3276334  | 0.02344123 | 4 |
| ENSMUSG00000046607 | Hrk      | -7.4575251 | 4.19E-08   | 1 |
| ENSMUSG00000046671 | Mtfr11   | 0.56298123 | 1.04E-59   | 3 |
| ENSMUSG00000046808 | Atp10d   | -0.6579927 | 1.15E-08   | 1 |
| ENSMUSG00000046909 | Tefm     | -0.4151504 | 0.00064989 | 1 |
| ENSMUSG00000046947 | Adck2    | 1.57232237 | 3.35E-34   | 4 |
| ENSMUSG00000046994 | Mars2    | -1.0213788 | 1.19E-59   | 2 |

|                    |               |            |            |   |
|--------------------|---------------|------------|------------|---|
| ENSMUSG00000047084 | Ngrn          | -0.6228424 | 9.92E-13   | 1 |
| ENSMUSG00000047123 | Ticam1        | -0.2178337 | 0.04849758 | 2 |
| ENSMUSG00000047205 | Dusp18        | 1.2422971  | 1.85E-151  | 3 |
| ENSMUSG00000047363 | Cstad         | 3.9204289  | 0.01246246 | 4 |
| ENSMUSG00000047635 | 2810006K23Rik | 0.47503986 | 1.09E-10   | 4 |
| ENSMUSG00000047649 | Cd3eap        | -1.6999831 | 9.04E-68   | 1 |
| ENSMUSG00000047804 | Akap10        | -0.7041795 | 2.37E-16   | 1 |
| ENSMUSG00000048007 | Timm8a1       | -1.3173709 | 1.49E-37   | 1 |
| ENSMUSG00000048351 | Coa7          | -0.9926924 | 9.31E-102  | 1 |
| ENSMUSG00000048371 | Pdp2          | -0.3687919 | 0.00017743 | 1 |
| ENSMUSG00000048429 | 1810026J23Rik | -0.5768003 | 1.78E-15   | 2 |
| ENSMUSG00000048482 | Bdnf          | -0.7958502 | 4.60E-12   | 2 |
| ENSMUSG00000048731 | Ggnbp1        | 1.55634693 | 0.00026346 | 4 |
| ENSMUSG00000048755 | Mcat          | 0.18473085 | 0.0361181  | 3 |
| ENSMUSG00000048756 | Foxo3         | -1.331125  | 1.41E-113  | 1 |
| ENSMUSG00000048826 | Dact2         | 1.45757516 | 3.14E-25   | 4 |
| ENSMUSG00000049038 | Mterf2        | 0.61305022 | 4.02E-05   | 4 |
| ENSMUSG00000049047 | Armex3        | -0.3115669 | 1.01E-05   | 1 |
| ENSMUSG00000049090 | Zadh2         | -1.3023007 | 2.41E-141  | 1 |
| ENSMUSG00000049106 | Dcaf5         | 0.36966285 | 4.87E-09   | 4 |
| ENSMUSG00000049119 | Fam110b       | 2.88374266 | 3.49E-32   | 4 |
| ENSMUSG00000049225 | Pdp1          | 0.73808918 | 3.33E-13   | 3 |
| ENSMUSG00000049287 | Iba57         | -0.9665601 | 1.35E-12   | 1 |
| ENSMUSG00000049422 | Chchd10       | -2.9718264 | 2.06E-144  | 1 |
| ENSMUSG00000049760 | 2410015M20Rik | 0.22289464 | 0.03377568 | 3 |
| ENSMUSG00000049792 | Bag5          | -0.4239949 | 4.21E-15   | 2 |

|                    |               |            |            |   |
|--------------------|---------------|------------|------------|---|
| ENSMUSG00000049858 | Suox          | 2.49051936 | 3.90E-123  | 4 |
| ENSMUSG00000050043 | Tmx2          | -0.365283  | 1.50E-05   | 1 |
| ENSMUSG00000050144 | Slc25a44      | -0.5590632 | 6.23E-20   | 1 |
| ENSMUSG00000050174 | Nudt6         | 0.84594445 | 0.00014809 | 3 |
| ENSMUSG00000050244 | Heatr1        | -1.6062003 | 1.24E-105  | 2 |
| ENSMUSG00000050312 | Nsun3         | 0.38587834 | 3.89E-05   | 3 |
| ENSMUSG00000050323 | Ndufaf6       | 0.58347872 | 0.00010557 | 4 |
| ENSMUSG00000050335 | Lgals3        | -1.2399828 | 6.60E-15   | 1 |
| ENSMUSG00000050394 | Armcx6        | 0.7682912  | 0.00148535 | 2 |
| ENSMUSG00000050608 | Minos1        | 0.66747977 | 1.65E-12   | 3 |
| ENSMUSG00000050705 | 2310061I04Rik | -0.1433432 | 0.04570665 | 1 |
| ENSMUSG00000050732 | Vamp8         | 0.85091738 | 2.52E-19   | 4 |
| ENSMUSG00000050856 | Atp5k         | 0.87131858 | 2.11E-20   | 3 |
| ENSMUSG00000050953 | Gja1          | -2.4195915 | 0          | 1 |
| ENSMUSG00000050965 | Prkca         | 0.53907599 | 4.68E-07   | 2 |
| ENSMUSG00000051043 | Gprc5c        | 4.98579005 | 0.00025448 | 4 |
| ENSMUSG00000051236 | Msrb3         | 2.01134104 | 8.87E-169  | 4 |
| ENSMUSG00000051319 | 1500011K16Rik | 1.11336968 | 1.03E-05   | 3 |
| ENSMUSG00000051343 | Rab11fip5     | 2.06881652 | 3.28E-86   | 4 |
| ENSMUSG00000051346 | Spryd4        | -0.2935438 | 0.00074643 | 1 |
| ENSMUSG00000051451 | Crebzf        | -0.2241473 | 0.0057639  | 1 |
| ENSMUSG00000051671 | Coa6          | 0.43154325 | 3.13E-07   | 3 |
| ENSMUSG00000052131 | Akr1b7        | 5.21400303 | 1.06E-06   | 3 |
| ENSMUSG00000052214 | Opa3          | -0.6403952 | 7.97E-24   | 1 |
| ENSMUSG00000052459 | Atp6v1a       | 0.30799177 | 3.69E-08   | 3 |
| ENSMUSG00000052852 | Reep1         | -2.2458153 | 9.59E-31   | 2 |



|                    |               |            |            |   |
|--------------------|---------------|------------|------------|---|
| ENSMUSG00000053253 | Ndfip2        | -1.0958222 | 5.49E-106  | 2 |
| ENSMUSG00000053329 | D10Jhu81e     | 0.86134233 | 0.00036796 | 3 |
| ENSMUSG00000053436 | Mapk14        | 0.47176839 | 5.39E-38   | 4 |
| ENSMUSG00000053644 | Aldh7a1       | -1.9570894 | 1.92E-127  | 2 |
| ENSMUSG00000053647 | Gper1         | 2.91915007 | 1.77E-20   | 3 |
| ENSMUSG00000053746 | Pthr1         | -0.2547214 | 0.0020099  | 3 |
| ENSMUSG00000053768 | Chchd3        | 0.51152849 | 9.80E-20   | 3 |
| ENSMUSG00000053898 | Ech1          | 0.47795312 | 2.11E-17   | 3 |
| ENSMUSG00000054021 | Sirt5         | 0.85851634 | 1.98E-08   | 4 |
| ENSMUSG00000054027 | Nt5dc3        | -1.5670316 | 1.30E-109  | 1 |
| ENSMUSG00000054099 | Slc25a40      | 0.57469016 | 1.51E-16   | 3 |
| ENSMUSG00000054312 | Mrps21        | 0.99194925 | 7.27E-27   | 3 |
| ENSMUSG00000054428 | Atpif1        | 0.63984921 | 3.49E-05   | 4 |
| ENSMUSG00000054676 | l600014C10Rik | 0.61856716 | 1.29E-05   | 3 |
| ENSMUSG00000054894 | Atp5s         | 1.37861872 | 2.90E-11   | 4 |
| ENSMUSG00000054942 | Fam73a        | 1.81381453 | 1.99E-35   | 4 |
| ENSMUSG00000055137 | Sugct         | 3.65045804 | 3.58E-05   | 4 |
| ENSMUSG00000055184 | Fam72a        | -0.6253955 | 0.0010441  | 1 |
| ENSMUSG00000055737 | Ghr           | -1.0361437 | 3.46E-31   | 1 |
| ENSMUSG00000055782 | Abcd2         | 0.87773787 | 0.00031421 | 3 |
| ENSMUSG00000055926 | Gm14137       | 0.49283851 | 0.01983657 | 4 |
| ENSMUSG00000056201 | Cfl1          | 0.59393475 | 1.08E-33   | 4 |
| ENSMUSG00000056228 | Cars2         | 1.04842294 | 8.23E-28   | 4 |
| ENSMUSG00000056234 | Ncoa4         | -0.5576453 | 2.17E-12   | 2 |
| ENSMUSG00000056394 | Lig1          | -0.2096404 | 0.00039098 | 1 |
| ENSMUSG00000056427 | Slit3         | -7.866122  | 3.48E-239  | 1 |

|                    |         |            |            |   |
|--------------------|---------|------------|------------|---|
| ENSMUSG00000056671 | Preld2  | 1.29414783 | 3.28E-07   | 4 |
| ENSMUSG00000056899 | Imp2l   | 2.54753118 | 1.52E-10   | 4 |
| ENSMUSG00000056999 | Ide     | 0.28574624 | 0.00333511 | 4 |
| ENSMUSG00000057134 | Ado     | -0.4485048 | 8.65E-18   | 1 |
| ENSMUSG00000057193 | Slc44a2 | 0.23457469 | 6.16E-09   | 3 |
| ENSMUSG00000057229 | Atp5sl  | -0.7252949 | 1.47E-14   | 1 |
| ENSMUSG00000057329 | Bcl2    | 1.9010004  | 6.69E-47   | 4 |
| ENSMUSG00000057363 | Uxs1    | -0.2170284 | 0.00259977 | 2 |
| ENSMUSG00000057388 | Mrpl18  | 0.42248571 | 1.24E-07   | 4 |
| ENSMUSG00000057411 | Fam173a | 1.15727252 | 9.59E-07   | 3 |
| ENSMUSG00000057497 | Fam136a | -0.6262112 | 1.96E-15   | 1 |
| ENSMUSG00000057666 | Gapdh   | 0.39046082 | 0.00772398 | 4 |
| ENSMUSG00000057789 | Bak1    | 0.38668341 | 0.00600713 | 4 |
| ENSMUSG00000058076 | Sdhc    | 0.53883807 | 1.48E-15   | 4 |
| ENSMUSG00000058267 | Mrps14  | 0.58954244 | 5.65E-12   | 4 |
| ENSMUSG00000058351 | Smim4   | 0.93451039 | 5.53E-08   | 3 |
| ENSMUSG00000058355 | Abce1   | -0.3433147 | 0.00045125 | 2 |
| ENSMUSG00000058586 | Serhl   | 2.01689417 | 3.58E-84   | 4 |
| ENSMUSG00000058756 | Thra    | 1.05212602 | 5.19E-21   | 4 |
| ENSMUSG00000058979 | Cecr5   | 0.29489989 | 0.00620136 | 4 |
| ENSMUSG00000058997 | Vwa8    | 0.59986299 | 1.52E-12   | 4 |
| ENSMUSG00000059183 | Mtfmt   | 0.58744805 | 6.26E-13   | 4 |
| ENSMUSG00000059447 | Hadhb   | 0.73863431 | 2.00E-12   | 4 |
| ENSMUSG00000059552 | Trp53   | -1.0688817 | 1.52E-53   | 2 |
| ENSMUSG00000059734 | Ndufs8  | 0.76460081 | 3.09E-05   | 4 |
| ENSMUSG00000059743 | Fdps    | 0.97825397 | 8.53E-62   | 3 |

|                    |         |            |            |   |
|--------------------|---------|------------|------------|---|
| ENSMUSG00000060636 | Rpl35a  | -0.77008   | 7.80E-17   | 1 |
| ENSMUSG00000060679 | Mrps9   | -0.418687  | 3.16E-07   | 3 |
| ENSMUSG00000060681 | Slc9a6  | 0.75579651 | 8.07E-20   | 4 |
| ENSMUSG00000060803 | Gstp1   | 0.47696953 | 2.11E-11   | 3 |
| ENSMUSG00000060923 | Acyp2   | 1.65524883 | 4.77E-14   | 4 |
| ENSMUSG00000061461 | Smim20  | 0.9527268  | 1.17E-24   | 3 |
| ENSMUSG00000061474 | Mrps36  | 0.46153864 | 1.10E-07   | 3 |
| ENSMUSG00000061758 | Akr1b10 | 1.96842889 | 3.34E-89   | 4 |
| ENSMUSG00000061838 | Suclg2  | 0.90839048 | 1.98E-66   | 4 |
| ENSMUSG00000061904 | Slc25a3 | -0.3117694 | 1.72E-06   | 1 |
| ENSMUSG00000062006 | Rpl34   | -0.4049748 | 6.40E-05   | 1 |
| ENSMUSG00000062209 | Erbp4   | -4.1806141 | 0.04142468 | 2 |
| ENSMUSG00000062480 | Acat3   | 1.15753357 | 1.02E-05   | 3 |
| ENSMUSG00000062488 | Ifit3b  | -3.2634252 | 0.00014195 | 3 |
| ENSMUSG00000062691 | Cebpz3  | 2.36659912 | 1.86E-61   | 4 |
| ENSMUSG00000062729 | Ppox    | 0.68567537 | 4.66E-09   | 3 |
| ENSMUSG00000062908 | Acadm   | 0.82928248 | 1.80E-39   | 4 |
| ENSMUSG00000062981 | Mrpl42  | 0.32139697 | 0.00292524 | 4 |
| ENSMUSG00000063077 | Kif1b   | 0.41378484 | 9.64E-05   | 4 |
| ENSMUSG00000063179 | Pstk    | 0.49493564 | 1.78E-06   | 3 |
| ENSMUSG00000063229 | Ldha    | 0.10605413 | 0.04267315 | 4 |
| ENSMUSG00000063235 | Ptpmt1  | -0.722281  | 2.85E-13   | 2 |
| ENSMUSG00000063450 | Syne2   | 0.31305844 | 0.00136418 | 4 |
| ENSMUSG00000063698 | Sfxn4   | 1.86994924 | 8.23E-21   | 4 |
| ENSMUSG00000063856 | Gpx1    | 1.09218908 | 4.33E-07   | 4 |
| ENSMUSG00000063882 | Uqcrh   | 0.56716122 | 3.36E-07   | 3 |

|                    |          |            |            |   |
|--------------------|----------|------------|------------|---|
| ENSMUSG00000063884 | Ptcd3    | -0.267652  | 0.00049531 | 2 |
| ENSMUSG00000064037 | Gpn1     | -0.4397399 | 3.12E-11   | 2 |
| ENSMUSG00000064068 | Mtx1     | -0.5282782 | 0.00013513 | 1 |
| ENSMUSG00000064090 | Vrk2     | 0.41426881 | 0.00053348 | 4 |
| ENSMUSG00000064215 | Ifi27    | -0.9449624 | 3.16E-25   | 1 |
| ENSMUSG00000064337 | mt-Rnr1  | 1.06774523 | 1.04E-17   | 4 |
| ENSMUSG00000064339 | mt-Rnr2  | 0.93852882 | 1.65E-12   | 4 |
| ENSMUSG00000064341 | mt-Nd1   | 1.22270672 | 1.52E-29   | 4 |
| ENSMUSG00000064345 | mt-Nd2   | 1.05730227 | 2.51E-24   | 4 |
| ENSMUSG00000064348 | mt-Tn    | 0.62830031 | 0.01159112 | 4 |
| ENSMUSG00000064349 | mt-Tc    | 0.68979018 | 0.00098552 | 4 |
| ENSMUSG00000064351 | mt-Co1   | 0.61819596 | 3.32E-10   | 4 |
| ENSMUSG00000064354 | mt-Co2   | 0.63038792 | 0.00091268 | 1 |
| ENSMUSG00000064356 | mt-Atp8  | 0.58032769 | 0.00017441 | 3 |
| ENSMUSG00000064357 | mt-Atp6  | 0.53328112 | 2.28E-08   | 3 |
| ENSMUSG00000064360 | mt-Nd3   | 1.95547396 | 0.011756   | 4 |
| ENSMUSG00000064363 | mt-Nd4   | 0.90037369 | 1.29E-12   | 4 |
| ENSMUSG00000064367 | mt-Nd5   | 1.30737342 | 6.98E-37   | 4 |
| ENSMUSG00000064368 | mt-Nd6   | 1.25475933 | 3.07E-33   | 4 |
| ENSMUSG00000064370 | mt-Cytb  | 0.64529536 | 3.34E-10   | 4 |
| ENSMUSG00000065990 | Aurkaip1 | 0.36515195 | 0.00099058 | 3 |
| ENSMUSG00000066595 | Mfsd7b   | -0.8207796 | 9.18E-20   | 2 |
| ENSMUSG00000066798 | Zbtb6    | -0.2931093 | 2.44E-05   | 2 |
| ENSMUSG00000066800 | Rnase1   | 1.82844633 | 2.11E-05   | 4 |
| ENSMUSG00000067369 | Trmt2b   | 1.45684101 | 1.23E-41   | 4 |
| ENSMUSG00000068206 | Pick1    | 0.8320294  | 8.41E-12   | 4 |

|                    |          |            |            |   |
|--------------------|----------|------------|------------|---|
| ENSMUSG00000068523 | Gng5     | -0.3414082 | 4.13E-11   | 1 |
| ENSMUSG00000068739 | Sars     | -1.4240823 | 3.38E-151  | 1 |
| ENSMUSG00000068823 | Csde1    | -0.3462742 | 2.16E-05   | 2 |
| ENSMUSG00000068921 | Dap3     | -0.298632  | 2.58E-08   | 3 |
| ENSMUSG00000068922 | Msto1    | 0.2060877  | 0.03704186 | 4 |
| ENSMUSG00000069844 | Sco1     | -0.8006601 | 1.86E-26   | 1 |
| ENSMUSG00000069874 | Irgm2    | -2.3071014 | 1.82E-64   | 3 |
| ENSMUSG00000070283 | Ndufaf3  | 1.24014688 | 2.43E-17   | 3 |
| ENSMUSG00000070284 | Gmppb    | 0.44483176 | 0.00250934 | 4 |
| ENSMUSG00000070394 | Tmem256  | 0.74344678 | 4.73E-24   | 3 |
| ENSMUSG00000070699 | Sars2    | 0.53893668 | 0.02566186 | 3 |
| ENSMUSG00000070730 | Rmdn3    | -0.4706687 | 3.74E-11   | 2 |
| ENSMUSG00000071253 | Slc25a16 | 0.31124227 | 2.92E-05   | 3 |
| ENSMUSG00000071528 | Usmg5    | 0.32600352 | 0.02157159 | 3 |
| ENSMUSG00000071711 | Mpst     | 1.02648105 | 0.00228523 | 3 |
| ENSMUSG00000071724 | Smpd5    | 1.07119002 | 0.00280755 | 4 |
| ENSMUSG00000072582 | Pthr2    | -0.649539  | 2.07E-22   | 1 |
| ENSMUSG00000072946 | Ptgr2    | 0.64703684 | 2.30E-20   | 4 |
| ENSMUSG00000073481 | 2-Mar    | 1.04784512 | 7.93E-24   | 4 |
| ENSMUSG00000073609 | D2hgdh   | 1.14162095 | 2.10E-13   | 4 |
| ENSMUSG00000073676 | Hspe1    | -0.4392443 | 7.44E-08   | 1 |
| ENSMUSG00000074064 | Mlycd    | 1.09775745 | 2.62E-35   | 3 |
| ENSMUSG00000074211 | Sdhaf1   | -0.5538056 | 0.01901355 | 2 |
| ENSMUSG00000074896 | Ifit3    | -0.6547744 | 0.00408033 | 3 |
| ENSMUSG00000075467 | Dnlz     | 0.37947453 | 2.02E-11   | 3 |
| ENSMUSG00000075604 | Cyp11b1  | 5.50490781 | 0.02552465 | 3 |

|                    |               |            |            |   |
|--------------------|---------------|------------|------------|---|
| ENSMUSG00000075704 | Txnrd2        | 0.99732832 | 1.03E-24   | 4 |
| ENSMUSG00000076431 | Sox4          | -1.4173008 | 3.59E-183  | 1 |
| ENSMUSG00000076435 | Acsf2         | 1.22386218 | 1.37E-84   | 4 |
| ENSMUSG00000076441 | Ass1          | -0.7220629 | 1.27E-11   | 2 |
| ENSMUSG00000078139 | AK157302      | -0.4680803 | 0.04549983 | 1 |
| ENSMUSG00000078566 | Bnip3         | 0.34747866 | 0.00047304 | 3 |
| ENSMUSG00000078572 | 1810043H04Rik | 0.84878928 | 5.75E-05   | 3 |
| ENSMUSG00000078656 | Vps25         | 0.86478109 | 0.04879528 | 3 |
| ENSMUSG00000078713 | Tomm5         | -0.4574741 | 1.61E-08   | 1 |
| ENSMUSG00000078716 | Tmem8b        | 2.74193994 | 1.74E-19   | 4 |
| ENSMUSG00000079017 | Ifi2712a      | -1.4383064 | 0.02064513 | 1 |
| ENSMUSG00000079036 | Alkbh1        | -0.7157205 | 1.66E-17   | 2 |
| ENSMUSG00000079037 | Prnp          | 0.3677325  | 2.65E-12   | 3 |
| ENSMUSG00000079043 | Fastkd5       | -0.5084955 | 0.00022311 | 2 |
| ENSMUSG00000079055 | Slc8a3        | 2.52732247 | 7.98E-05   | 3 |
| ENSMUSG00000079508 | Apoo          | 0.74122312 | 9.24E-05   | 4 |
| ENSMUSG00000079555 | Haus3         | -0.6140762 | 1.46E-09   | 2 |
| ENSMUSG00000086784 | Isoc2a        | -0.7855549 | 1.76E-05   | 3 |
| ENSMUSG00000087687 | Pet100        | 1.38880883 | 9.47E-20   | 4 |
| ENSMUSG00000089682 | Bcl2l2        | -0.5983938 | 7.88E-15   | 2 |
| ENSMUSG00000090110 | Cmc4          | 0.74476608 | 0.00343437 | 4 |
| ENSMUSG00000090247 | Bloc1s1       | 1.22641523 | 1.43E-15   | 3 |
| ENSMUSG00000090877 | Hspa1b        | 0.77830364 | 3.34E-31   | 3 |
| ENSMUSG00000090935 | Synj2bp       | -0.5196732 | 8.50E-06   | 2 |

**B.** 68 OXPHOS -related genes that are DE (p-adj < 0.05) between WT4 and KO4 cells.

| gene.ids | gene.name | WT4 vs KO4 |
|----------|-----------|------------|
|----------|-----------|------------|

|                    |         | log2FC     | p-adj      |
|--------------------|---------|------------|------------|
| ENSMUSG00000000171 | Sdhd    | -0.1983493 | 0.00195243 |
| ENSMUSG00000004446 | Bid     | 0.27668073 | 2.37E-07   |
| ENSMUSG00000005373 | Mlxipl  | -5.3026336 | 5.80E-09   |
| ENSMUSG00000006457 | Actn3   | 3.71337188 | 7.94E-13   |
| ENSMUSG00000013593 | Ndufs2  | 0.58420549 | 6.02E-30   |
| ENSMUSG00000014554 | Dguok   | 0.6293764  | 3.18E-17   |
| ENSMUSG00000015790 | Surf1   | 0.50405635 | 1.42E-13   |
| ENSMUSG00000020022 | Ndufa12 | -0.3629585 | 5.71E-05   |
| ENSMUSG00000020664 | Dld     | -0.3576807 | 5.05E-07   |
| ENSMUSG00000021520 | Uqcrb   | 0.3221319  | 0.00234061 |
| ENSMUSG00000021577 | Sdha    | 0.20066657 | 0.00065839 |
| ENSMUSG00000021868 | Ppif    | -0.8059533 | 1.84E-30   |
| ENSMUSG00000022013 | Dnajc15 | 0.25785153 | 0.04725355 |
| ENSMUSG00000022346 | Myc     | -2.0979364 | 3.56E-114  |
| ENSMUSG00000022354 | Ndufb9  | 0.6491557  | 1.36E-14   |
| ENSMUSG00000022890 | Atp5j   | 0.25982066 | 0.00095427 |
| ENSMUSG00000022956 | Atp5o   | 0.34574865 | 2.32E-07   |
| ENSMUSG00000024038 | Ndufv3  | 1.46266682 | 9.27E-40   |
| ENSMUSG00000024099 | Ndufv2  | 0.90074217 | 5.55E-19   |
| ENSMUSG00000024151 | Msh2    | 0.59415333 | 8.12E-23   |
| ENSMUSG00000024208 | Uqcc2   | 0.82992846 | 8.88E-07   |
| ENSMUSG00000024248 | Cox7a2l | 0.49606229 | 1.92E-19   |
| ENSMUSG00000025204 | Ndufb8  | 0.91606108 | 1.28E-16   |
| ENSMUSG00000025393 | Atp5b   | 0.25209633 | 6.97E-07   |
| ENSMUSG00000025403 | Shmt2   | -1.3436235 | 4.75E-09   |
| ENSMUSG00000025428 | Atp5a1  | 0.2964131  | 2.25E-11   |
| ENSMUSG00000025651 | Uqcrc1  | 0.65751311 | 1.28E-05   |
| ENSMUSG00000025781 | Atp5c1  | 0.55526313 | 3.18E-17   |
| ENSMUSG00000025825 | Iscu    | 0.73295114 | 1.17E-50   |

|                    |            |            |            |
|--------------------|------------|------------|------------|
| ENSMUSG00000025889 | Snca       | 1.06992205 | 0.04802703 |
| ENSMUSG00000026260 | Ndufa10    | 0.38681747 | 4.00E-11   |
| ENSMUSG00000026895 | Ndufa8     | 0.72708073 | 2.11E-09   |
| ENSMUSG00000027282 | Mtch2      | -0.7639522 | 3.98E-34   |
| ENSMUSG00000027305 | Ndufaf1    | -0.2992722 | 0.0001627  |
| ENSMUSG00000028455 | Stoml2     | -0.189253  | 4.70E-05   |
| ENSMUSG00000028527 | Ak4        | -2.382706  | 1.89E-25   |
| ENSMUSG00000028756 | Pink1      | 1.50919461 | 8.50E-36   |
| ENSMUSG00000028964 | Park7      | 1.33731281 | 1.44E-97   |
| ENSMUSG00000028982 | Slc25a33   | -0.9160017 | 2.13E-42   |
| ENSMUSG00000029432 | Gbas       | 0.940802   | 3.58E-64   |
| ENSMUSG00000030652 | Coq7       | 0.3677192  | 0.00095427 |
| ENSMUSG00000031378 | Abcd1      | 0.52306065 | 0.00221805 |
| ENSMUSG00000031393 | Mecp2      | -0.6349368 | 2.87E-16   |
| ENSMUSG00000031782 | Coq9       | 0.83586602 | 6.67E-49   |
| ENSMUSG00000031818 | Cox4i1     | 0.63757664 | 1.47E-05   |
| ENSMUSG00000032330 | Cox7a2     | 0.47031677 | 7.73E-07   |
| ENSMUSG00000033751 | Gadd45gip1 | 0.60463087 | 1.13E-06   |
| ENSMUSG00000037916 | Ndufv1     | 0.37511328 | 0.0217821  |
| ENSMUSG00000038690 | Atp5j2     | 0.30457865 | 0.00038765 |
| ENSMUSG00000039065 | Fam173b    | 0.42425346 | 1.89E-06   |
| ENSMUSG00000041431 | Ccnb1      | 0.21876391 | 0.03377568 |
| ENSMUSG00000041697 | Cox6a1     | 0.76206075 | 0.00524493 |
| ENSMUSG00000043702 | Pde12      | -0.4936079 | 9.91E-10   |
| ENSMUSG00000046329 | Slc25a23   | 1.52321067 | 2.61E-62   |
| ENSMUSG00000046909 | Tefm       | -0.4151504 | 0.00064989 |
| ENSMUSG00000048482 | Bdnf       | -0.7958502 | 4.60E-12   |
| ENSMUSG00000049422 | Chchd10    | -2.9718264 | 2.06E-144  |
| ENSMUSG00000058076 | Sdhc       | 0.53883807 | 1.48E-15   |
| ENSMUSG00000059734 | Ndufs8     | 0.76460081 | 3.09E-05   |



|                    |         |            |            |
|--------------------|---------|------------|------------|
| ENSMUSG00000062070 | Pgk1    | 0.55334599 | 4.66E-09   |
| ENSMUSG00000063882 | Uqcrh   | 0.56716122 | 3.36E-07   |
| ENSMUSG00000064345 | mt-Nd2  | 1.05730227 | 2.51E-24   |
| ENSMUSG00000064351 | mt-Co1  | 0.61819596 | 3.32E-10   |
| ENSMUSG00000064354 | mt-Co2  | 0.63038792 | 0.00091268 |
| ENSMUSG00000064357 | mt-Atp6 | 0.53328112 | 2.28E-08   |
| ENSMUSG00000064363 | mt-Nd4  | 0.90037369 | 1.29E-12   |
| ENSMUSG00000064367 | mt-Nd5  | 1.30737342 | 6.98E-37   |
| ENSMUSG00000064370 | mt-Cytb | 0.64529536 | 3.34E-10   |

### C. Paired t-test summary results

| <b>1. Mitochondria-related genes (n=1136)</b> |                |                        |                                  |                                |                                 |                                               |
|-----------------------------------------------|----------------|------------------------|----------------------------------|--------------------------------|---------------------------------|-----------------------------------------------|
| <b>Pair-wise comparisson (A vs. B)</b>        | <b>P-value</b> | <b>P-value summary</b> | <b>Mean of differences (B-A)</b> | <b>SD of differences (B-A)</b> | <b>SEM of differences (B-A)</b> | <b>95% confidence interval of differences</b> |
| WTM vs. WT4                                   | 0.0605         | ns                     | 0.06795                          | 1.219                          | 0.03616                         | -0.003007 to 0.1389                           |
| WT4 vs. WT14                                  | < 0.0001       | ****                   | 0.1539                           | 0.9763                         | 0.02897                         | 0.09703 to 0.2107                             |
| WTM vs WT14                                   | < 0.0001       | ****                   | 0.2218                           | 1.059                          | 0.03141                         | 0.1602 to 0.2834                              |
| KOM vs. KO4                                   | < 0.0001       | ****                   | 0.1701                           | 0.8783                         | 0.02606                         | 0.1190 to 0.2212                              |
| KO4 vs. KO14                                  | < 0.0001       | ****                   | 0.1636                           | 0.7082                         | 0.02101                         | 0.1223 to 0.2048                              |
| KOM vs KO14                                   | < 0.0001       | ****                   | 0.3336                           | 1.004                          | 0.02979                         | 0.2752 to 0.3921                              |
| WTM vs. KOM                                   | 0.6028         | ns                     | -0.009347                        | 0.6053                         | 0.01796                         | -0.04458 to 0.02589                           |
| WT4 vs. KO4                                   | 0.0006         | ***                    | 0.09279                          | 0.9115                         | 0.02704                         | 0.03972 to 0.1458                             |
| WT14 vs. KO14                                 | <0.0001        | ****                   | 0.1025                           | 0.6299                         | 0.01869                         | 0.06581 to 0.1392                             |
|                                               |                |                        |                                  |                                |                                 |                                               |
| <b>2. OXPHOS-related genes (n=68)</b>         |                |                        |                                  |                                |                                 |                                               |
| <b>Pair-wise comparisson (A vs. B)</b>        | <b>P-value</b> | <b>P-value summary</b> | <b>Mean of differences (B-A)</b> | <b>SD of differences (B-A)</b> | <b>SEM of differences (B-A)</b> | <b>95% confidence interval of differences</b> |
| WTM vs. WT4                                   | 0.6463         | ns                     | -0.07643                         | 1.367                          | 0.1658                          | -0.4073 to 0.2545                             |
| WT4 vs. WT14                                  | < 0.0001       | ****                   | 0.4011                           | 0.7645                         | 0.09271                         | 0.2161 to 0.5862                              |
| WTM vs WT14                                   | 0.0339         | *                      | 0.3247                           | 1.236                          | 0.1499                          | 0.02547 to 0.6239                             |
| KOM vs. KO4                                   | 0.0498         | *                      | 0.2622                           | 1.082                          | 0.1312                          | 0.0002907 to 0.5242                           |

|               |        |    |          |        |         |                    |
|---------------|--------|----|----------|--------|---------|--------------------|
| KO4 vs. KO14  | 0.0041 | ** | 0.2235   | 0.6195 | 0.07513 | 0.07355 to 0.3735  |
| KOM vs KO14   | 0.0017 | ** | 0.4857   | 1.227  | 0.1488  | 0.1877 to 0.7827   |
| WTM vs. KOM   | 0.604  | ns | -0.03416 | 0.5405 | 0.06555 | -0.1650 to 0.09667 |
| WT4 vs. KO4   | 0.0026 | ** | 0.3045   | 0.8028 | 0.09735 | 0.1102 to 0.4988   |
| WT14 vs. KO14 | 0.0146 | *  | 0.1269   | 0.4172 | 0.05059 | 0.02588 to 0.2278  |

\*Note that these results were performed on VST-normalized data, and therefore not on z-score normalized data.

#### D. Gene Ontology (GO) - KEGG Pathway analysis

| Cluster 1 (n=268)              |            |            |            |            |
|--------------------------------|------------|------------|------------|------------|
| KEGG Pathway                   | Gene count | PValue     | Bonferroni | Benjamini  |
| One carbon pool by folate      | 7          | 3.56E-07   | 7.32E-05   | 7.32E-05   |
| Aminoacyl-tRNA biosynthesis    | 9          | 9.56E-06   | 0.0019673  | 9.84E-04   |
| Biosynthesis of antibiotics    | 13         | 1.62E-04   | 0.03287415 | 0.01108037 |
| Biosynthesis of amino acids    | 8          | 2.08E-04   | 0.04191317 | 0.01064713 |
| Metabolic pathways             | 37         | 3.10E-04   | 0.06186667 | 0.01269142 |
| Ribosome                       | 10         | 5.29E-04   | 0.10323299 | 0.01799597 |
| Carbon metabolism              | 8          | 0.00260806 | 0.41606281 | 0.07397282 |
| PI3K-Akt signaling pathway     | 14         | 0.0041714  | 0.57730563 | 0.10204762 |
| FoxO signaling pathway         | 8          | 0.00578969 | 0.69764177 | 0.12445152 |
| Prolactin signaling pathway    | 6          | 0.00629814 | 0.72788206 | 0.122038   |
| Selenocompound metabolism      | 3          | 0.02994278 | 0.99809342 | 0.43408602 |
| TNF signaling pathway          | 6          | 0.03108646 | 0.99850474 | 0.41848674 |
| Neurotrophin signaling pathway | 6          | 0.04687873 | 0.99994936 | 0.53271852 |
| Sphingolipid signaling pathway | 6          | 0.04966426 | 0.99997229 | 0.52741842 |

| Cluster 2 (n=194)              |            |            |            |            |
|--------------------------------|------------|------------|------------|------------|
| KEGG Pathway                   | Gene count | PValue     | Bonferroni | Benjamini  |
| Metabolic pathways             | 32         | 2.23E-04   | 0.0436656  | 0.0436656  |
| Biosynthesis of antibiotics    | 11         | 4.39E-04   | 0.08399395 | 0.04291795 |
| Neurotrophin signaling pathway | 8          | 0.00100562 | 0.18227218 | 0.06487516 |
| Pyruvate metabolism            | 5          | 0.00156099 | 0.26834205 | 0.07513781 |
| Peroxisome                     | 6          | 0.00438069 | 0.58441305 | 0.16105714 |

|                                             |   |            |            |            |
|---------------------------------------------|---|------------|------------|------------|
| Central carbon metabolism in cancer         | 5 | 0.00941928 | 0.84934824 | 0.27054971 |
| Hepatitis B                                 | 7 | 0.01167774 | 0.90456338 | 0.28510048 |
| Alanine, aspartate and glutamate metabolism | 4 | 0.01203351 | 0.91119389 | 0.26115157 |
| Arginine biosynthesis                       | 3 | 0.02478675 | 0.9933943  | 0.42750892 |
| Arginine and proline metabolism             | 4 | 0.02552213 | 0.99431937 | 0.40373453 |
| MicroRNAs in cancer                         | 9 | 0.02683938 | 0.99566584 | 0.39021995 |
| Valine, leucine and isoleucine degradation  | 4 | 0.03438194 | 0.99908573 | 0.44184305 |
| D-Glutamine and D-glutamate metabolism      | 2 | 0.0385066  | 0.99961162 | 0.45344294 |
| Huntington's disease                        | 7 | 0.04379956 | 0.99987124 | 0.47261507 |
| Pancreatic cancer                           | 4 | 0.05221541 | 0.99997803 | 0.51082765 |
| Thyroid cancer                              | 3 | 0.05413626 | 0.99998535 | 0.50127948 |
| Insulin resistance                          | 5 | 0.05467847 | 0.99998694 | 0.48393953 |

| Cluster 3 (n=279)                          |            |            |            |            |
|--------------------------------------------|------------|------------|------------|------------|
| KEGG Pathway                               | Gene count | PValue     | Bonferroni | Benjamini  |
| Metabolic pathways                         | 82         | 2.07E-26   | 3.41E-24   | 3.41E-24   |
| Oxidative phosphorylation                  | 27         | 6.09E-19   | 1.00E-16   | 5.02E-17   |
| Alzheimer's disease                        | 27         | 3.05E-16   | 5.50E-14   | 1.83E-14   |
| Parkinson's disease                        | 24         | 6.67E-15   | 1.10E-12   | 2.75E-13   |
| Huntington's disease                       | 26         | 4.91E-14   | 8.10E-12   | 1.62E-12   |
| Non-alcoholic fatty liver disease (NAFLD)  | 19         | 1.13E-09   | 1.86E-07   | 3.10E-08   |
| Peroxisome                                 | 13         | 5.74E-08   | 9.47E-06   | 1.35E-06   |
| Fatty acid degradation                     | 8          | 4.03E-05   | 0.00663452 | 8.32E-04   |
| Fatty acid metabolism                      | 8          | 5.26E-05   | 0.00864636 | 9.64E-04   |
| Biosynthesis of antibiotics                | 15         | 6.89E-05   | 0.01131068 | 0.00113687 |
| Pyruvate metabolism                        | 7          | 9.55E-05   | 0.0156325  | 0.00143134 |
| Carbon metabolism                          | 10         | 4.15E-04   | 0.06615989 | 0.00568793 |
| Citrate cycle (TCA cycle)                  | 5          | 0.00326818 | 0.41732943 | 0.0406974  |
| Biosynthesis of amino acids                | 7          | 0.00354293 | 0.44323999 | 0.04096727 |
| Valine, leucine and isoleucine degradation | 6          | 0.00419144 | 0.49994661 | 0.0451516  |
| PPAR signaling pathway                     | 7          | 0.0045703  | 0.53037824 | 0.04614082 |
| Glycerolipid metabolism                    | 6          | 0.00526954 | 0.58179032 | 0.04998806 |

|                                 |   |            |            |            |
|---------------------------------|---|------------|------------|------------|
| Arginine biosynthesis           | 4 | 0.00560253 | 0.60426731 | 0.05019721 |
| Aminoacyl-tRNA biosynthesis     | 6 | 0.00907984 | 0.77798625 | 0.07615537 |
| ABC transporters                | 5 | 0.01202106 | 0.86405338 | 0.09495865 |
| Tryptophan metabolism           | 5 | 0.01294457 | 0.88349241 | 0.09730575 |
| Arginine and proline metabolism | 5 | 0.01492464 | 0.91635113 | 0.1066515  |
| Propanoate metabolism           | 4 | 0.01509693 | 0.91873077 | 0.10338606 |
| Sulfur relay system             | 3 | 0.01534447 | 0.9220325  | 0.100855   |
| Cardiac muscle contraction      | 6 | 0.01694194 | 0.94035657 | 0.10664823 |
| Fatty acid biosynthesis         | 3 | 0.02949015 | 0.9928387  | 0.1730111  |

| Cluster 4 (n=395)                          |            |            |            |            |
|--------------------------------------------|------------|------------|------------|------------|
| KEGG Pathway                               | Gene count | PValue     | Bonferroni | Benjamini  |
| Metabolic pathways                         | 104        | 7.26E-30   | 1.50E-27   | 1.50E-27   |
| Parkinson's disease                        | 38         | 2.22E-26   | 4.60E-24   | 2.30E-24   |
| Oxidative phosphorylation                  | 32         | 1.12E-20   | 2.31E-18   | 7.70E-19   |
| Alzheimer's disease                        | 35         | 2.09E-20   | 4.34E-18   | 1.08E-18   |
| Carbon metabolism                          | 29         | 9.63E-20   | 1.99E-17   | 3.99E-18   |
| Valine, leucine and isoleucine degradation | 21         | 2.76E-18   | 5.72E-16   | 9.54E-17   |
| Biosynthesis of antibiotics                | 32         | 5.50E-15   | 1.15E-12   | 1.64E-13   |
| Huntington's disease                       | 29         | 2.38E-13   | 4.93E-11   | 6.16E-12   |
| Fatty acid degradation                     | 16         | 1.04E-12   | 2.14E-10   | 2.38E-11   |
| Glyoxylate and dicarboxylate metabolism    | 13         | 3.25E-12   | 6.73E-10   | 6.73E-11   |
| Citrate cycle (TCA cycle)                  | 13         | 1.32E-11   | 2.73E-09   | 2.48E-10   |
| Non-alcoholic fatty liver disease (NAFLD)  | 23         | 1.26E-10   | 2.61E-08   | 2.17E-09   |
| Peroxisome                                 | 17         | 3.88E-10   | 8.03E-08   | 6.18E-09   |
| Propanoate metabolism                      | 11         | 8.27E-10   | 1.71E-07   | 1.22E-08   |
| Fatty acid metabolism                      | 13         | 5.94E-09   | 1.23E-06   | 8.20E-08   |
| Pyruvate metabolism                        | 9          | 6.72E-06   | 0.00138959 | 8.69E-05   |
| Tryptophan metabolism                      | 9          | 2.86E-05   | 0.00590029 | 3.48E-04   |
| Butanoate metabolism                       | 6          | 6.41E-04   | 0.12429834 | 0.00734676 |
| 2-Oxocarboxylic acid metabolism            | 5          | 0.00138703 | 0.24972504 | 0.01500811 |
| Aminoacyl-tRNA biosynthesis                | 8          | 0.00177243 | 0.30734215 | 0.01819342 |

|                                     |   |            |            |            |
|-------------------------------------|---|------------|------------|------------|
| PPAR signaling pathway              | 8 | 0.0052883  | 0.66632358 | 0.05092351 |
| ABC transporters                    | 6 | 0.00722989 | 0.77732088 | 0.06599529 |
| Long-term potentiation              | 7 | 0.00801637 | 0.81101284 | 0.06987668 |
| GnRH signaling pathway              | 8 | 0.00884568 | 0.84105598 | 0.07377072 |
| beta-Alanine metabolism             | 5 | 0.01095028 | 0.89763499 | 0.08713604 |
| Lysine degradation                  | 6 | 0.01205965 | 0.91885544 | 0.09207821 |
| Apoptosis                           | 6 | 0.02138126 | 0.9885975  | 0.15270032 |
| Fatty acid elongation               | 4 | 0.03091032 | 0.99849568 | 0.20715048 |
| Arginine and proline metabolism     | 5 | 0.04086668 | 0.9998226  | 0.25757362 |
| Neurotrophin signaling pathway      | 8 | 0.04412951 | 0.99991238 | 0.26759135 |
| Amyotrophic lateral sclerosis (ALS) | 5 | 0.04628503 | 0.99994509 | 0.27126544 |

## Table S2. OBD Analyses

### A. DE genes in each pair-wise comparison

| Pairwise comparison (A vs. B) | Significantly DE genes* | Upregulated in B | Downregulated in B |
|-------------------------------|-------------------------|------------------|--------------------|
| KOM vs. WTM                   | 2124                    | 1208             | 916                |
| KO4 vs. WT4                   | 4617                    | 2678             | 1939               |
| KO14 vs. WT14                 | 3401                    | 1431             | 1970               |
| WTM vs. WT4                   | 7995                    | 4647             | 3348               |
| WT4 vs. WT14                  | 5784                    | 2035             | 3749               |
| WTM vs. WT14                  | 6501                    | 2981             | 3520               |
| KOM vs. KO4                   | 5606                    | 3211             | 2395               |
| KO4 vs KO14                   | 3301                    | 1712             | 1589               |
| KOM vs. KO14                  | 6236                    | 3400             | 2836               |

\*Significantly DE genes includes genes with  $p\text{-adj} < 0.05$  and  $\log_2\text{FC} > 1$  or  $\log_2\text{FC} < -1$  from differential expression analysis using DESeq2

### B. GO summary (WT)

| WTM vs. WT4                |       |          |                 |
|----------------------------|-------|----------|-----------------|
| Term                       | Count | PValue   | Fold Enrichment |
| osteoblast differentiation | 53    | 7.60E-06 | 1.75697909      |

|                                                        |    |            |            |
|--------------------------------------------------------|----|------------|------------|
| positive regulation of canonical Wnt signaling pathway | 34 | 6.51E-05   | 1.90096132 |
| negative regulation of canonical Wnt signaling pathway | 45 | 2.36E-04   | 1.65265236 |
| positive regulation of osteoblast differentiation      | 32 | 6.09E-04   | 1.76282918 |
| endochondral ossification                              | 17 | 0.00173442 | 2.12274014 |
| negative regulation of osteoblast differentiation      | 26 | 0.00282951 | 1.73921986 |
| intramembranous ossification                           | 6  | 0.00631014 | 3.74601202 |
| positive regulation of BMP signaling pathway           | 18 | 0.0065126  | 1.87300601 |
| positive regulation of Wnt signaling pathway           | 18 | 0.00909743 | 1.82238422 |
| positive regulation of bone mineralization             | 18 | 0.00909743 | 1.82238422 |
| bone trabecula formation                               | 7  | 0.01398443 | 2.9135649  |
| bone resorption                                        | 13 | 0.01813321 | 1.94792625 |
| Wnt signaling pathway, planar cell polarity pathway    | 9  | 0.02552832 | 2.24760721 |
| regulation of Wnt signaling pathway                    | 10 | 0.02928646 | 2.08111779 |
| regulation of bone mineralization                      | 11 | 0.03201367 | 1.96219677 |

| <b>WT4 vs. WT14</b>                                    |              |               |                        |
|--------------------------------------------------------|--------------|---------------|------------------------|
| <b>Term</b>                                            | <b>Count</b> | <b>PValue</b> | <b>Fold Enrichment</b> |
| positive regulation of osteoblast differentiation      | 36           | 2.19E-07      | 2.327455271            |
| osteoblast differentiation                             | 48           | 5.79E-06      | 1.867456737            |
| negative regulation of canonical Wnt signaling pathway | 42           | 5.74E-05      | 1.810242989            |
| ossification                                           | 38           | 3.51E-04      | 1.740203825            |
| positive regulation of bone mineralization             | 19           | 4.78E-04      | 2.257561719            |
| positive regulation of canonical Wnt signaling pathway | 28           | 9.58E-04      | 1.837261541            |
| negative regulation of Wnt signaling pathway           | 24           | 0.00164511    | 1.884130457            |
| positive regulation of BMP signaling pathway           | 16           | 0.00870008    | 1.953913067            |
| endochondral ossification                              | 14           | 0.00973819    | 2.05160872             |
| negative regulation of ossification                    | 11           | 0.01052959    | 2.302826115            |
| positive regulation of Wnt signaling pathway           | 16           | 0.01161132    | 1.901104606            |
| canonical Wnt signaling pathway                        | 31           | 0.01174502    | 1.531297038            |
| cellular response to BMP stimulus                      | 15           | 0.0165345     | 1.884130457            |

|                                                     |    |            |             |
|-----------------------------------------------------|----|------------|-------------|
| negative regulation of osteoblast differentiation   | 21 | 0.01882571 | 1.64861415  |
| BMP signaling pathway involved in heart development | 5  | 0.02688102 | 3.663587001 |
| bone trabecula formation                            | 6  | 0.03335116 | 2.9308696   |
| positive regulation of osteoclast differentiation   | 11 | 0.04005521 | 1.934373936 |
| bone morphogenesis                                  | 13 | 0.04262751 | 1.785998663 |
| regulation of canonical Wnt signaling pathway       | 10 | 0.04365866 | 1.998320182 |

### C. GO summary (KO)

| <b>KOM vs. KO4</b>                                       |              |               |                        |
|----------------------------------------------------------|--------------|---------------|------------------------|
| <b>Term</b>                                              | <b>Count</b> | <b>PValue</b> | <b>Fold Enrichment</b> |
| osteoblast differentiation                               | 41           | 8.34E-06      | 2.00818049             |
| endochondral ossification                                | 17           | 1.37E-05      | 3.13635343             |
| bone mineralization                                      | 18           | 3.64E-05      | 2.84643841             |
| positive regulation of osteoblast differentiation        | 25           | 5.32E-04      | 2.03483138             |
| Wnt signaling pathway, calcium modulating pathway        | 7            | 6.93E-04      | 4.84289868             |
| negative regulation of ossification                      | 11           | 0.00183541    | 2.89915023             |
| positive regulation of bone mineralization               | 15           | 0.00359786    | 2.24381406             |
| ossification                                             | 29           | 0.00515372    | 1.67195312             |
| negative regulation of canonical Wnt signaling pathway   | 30           | 0.00661664    | 1.6278651              |
| intramembranous ossification                             | 5            | 0.0116847     | 4.61228446             |
| bone trabecula formation                                 | 6            | 0.01266169    | 3.68982757             |
| positive regulation of BMP signaling pathway             | 13           | 0.02040186    | 1.9986566              |
| positive regulation of cell proliferation in bone marrow | 5            | 0.02338456    | 3.95338668             |
| positive regulation of ossification                      | 9            | 0.0423823     | 2.16576836             |
| positive regulation of canonical Wnt signaling pathway   | 19           | 0.04791899    | 1.56955352             |

| <b>KO4 vs. KO14</b>                               |              |               |                        |
|---------------------------------------------------|--------------|---------------|------------------------|
| <b>Term</b>                                       | <b>Count</b> | <b>PValue</b> | <b>Fold Enrichment</b> |
| osteoblast differentiation                        | 38           | 2.41E-08      | 2.64722358             |
| positive regulation of osteoblast differentiation | 23           | 1.99E-05      | 2.66259059             |
| positive regulation of osteoclast differentiation | 11           | 5.69E-04      | 3.46368306             |
| positive regulation of Wnt signaling pathway      | 13           | 0.001476      | 2.76584029             |

|                                                          |    |            |            |
|----------------------------------------------------------|----|------------|------------|
| regulation of osteoclast differentiation                 | 8  | 0.00320929 | 3.70447387 |
| bone morphogenesis                                       | 11 | 0.00487061 | 2.70600239 |
| positive regulation of bone mineralization               | 12 | 0.00491355 | 2.55308334 |
| positive regulation of bone resorption                   | 8  | 0.00907348 | 3.14880279 |
| bone mineralization                                      | 11 | 0.00971819 | 2.47405933 |
| ossification                                             | 21 | 0.01666437 | 1.72200152 |
| cellular response to BMP stimulus                        | 10 | 0.02740224 | 2.24914485 |
| endochondral ossification                                | 9  | 0.029817   | 2.36160209 |
| negative regulation of canonical Wnt signaling pathway   | 21 | 0.03067359 | 1.62070732 |
| negative regulation of bone mineralization               | 6  | 0.03295687 | 3.14880279 |
| positive regulation of canonical Wnt signaling pathway   | 15 | 0.03976366 | 1.76238962 |
| positive regulation of cell proliferation in bone marrow | 4  | 0.04819914 | 4.49828969 |
| ossification involved in bone maturation                 | 4  | 0.04819914 | 4.49828969 |

**Table S3. OBD, Wnt and BMP clusters.**

The 3 pair-wise DE significance comparisons refer to:

1. WTM vs. KOM
2. WT4 vs KO4
3. WT14 vs KO14

Genes that are involved in positive regulation of OBD are marked with '1', and genes that are involved with negative regulation of OBD are marked with '-1'.

**A. OBD: clusters, significance and GO analysis**

| Cluster assignment |           |                    | Pairwise DE significance |              |                | Gene Ontology     |                   |
|--------------------|-----------|--------------------|--------------------------|--------------|----------------|-------------------|-------------------|
| Cluster            | Gene name | Gene ID            | WTM v<br>KOM             | WT4 v<br>KO4 | WT14 v<br>KO14 | Pos reg of<br>OBD | Neg reg<br>of OBD |
| 1                  | Acvr1     | ENSMUSG00000026836 | ****                     | .            | .              | 1                 | 0                 |
| 1                  | Jag1      | ENSMUSG00000027276 | ****                     | ****         | ****           | 1                 | 0                 |
| 1                  | Lgr4      | ENSMUSG00000050199 | ****                     | .            | .              | 0                 | 0                 |
| 1                  | Fgf2      | ENSMUSG00000037225 | ****                     | ****         | .              | 1                 | 0                 |
| 1                  | Tmem64    | ENSMUSG00000043252 | ****                     | ****         | .              | 0                 | -1                |
| 1                  | Tmem119   | ENSMUSG00000054675 | ****                     | ****         | .              | 1                 | 0                 |
| 1                  | Smoc1     | ENSMUSG00000021136 | ****                     | ****         | ***            | 0                 | 0                 |
| 1                  | Rspo2     | ENSMUSG00000051920 | ****                     | ****         | .              | 0                 | 0                 |
| 1                  | Pdlim7    | ENSMUSG00000021493 | ****                     | .            | .              | 1                 | 0                 |
| 1                  | Ilk       | ENSMUSG00000030890 | **                       | .            | .              | 1                 | 0                 |
| 1                  | Trp63     | ENSMUSG00000022510 | **                       | ****         | .              | 1                 | 0                 |



|   |        |                    |      |      |      |   |    |
|---|--------|--------------------|------|------|------|---|----|
| 1 | Ptger4 | ENSMUSG00000039942 | **** | **** | **** | 1 | 0  |
| 1 | Msx2   | ENSMUSG00000021469 | **** | **** | **** | 1 | 0  |
| 1 | Lox    | ENSMUSG00000024529 | **** | **** | **** | 0 | 0  |
| 1 | Actn3  | ENSMUSG00000006457 | **** | **** | *    | 0 | 0  |
| 1 | Id3    | ENSMUSG00000007872 | **** | **** | .    | 0 | -1 |
| 2 | Id4    | ENSMUSG00000021379 | .    | .    | *    | 0 | 0  |
| 2 | Nog    | ENSMUSG00000048616 | ***  | .    | .    | 0 | -1 |
| 2 | Ccrn4l | ENSMUSG00000023087 | .    | **** | .    | 0 | -1 |
| 2 | Fbn2   | ENSMUSG00000024598 | .    | **** | ***  | 1 | 0  |
| 2 | Igf1   | ENSMUSG00000020053 | **** | **   | *    | 1 | 0  |
| 2 | Wnt10b | ENSMUSG00000022996 | .    | **** | **** | 1 | 0  |
| 2 | Wnt4   | ENSMUSG00000036856 | .    | **** | **** | 1 | 0  |
| 2 | Id2    | ENSMUSG00000020644 | **** | **** | **** | 0 | -1 |
| 2 | Dlk1   | ENSMUSG00000040856 | **** | *    | .    | 0 | -1 |
| 2 | Mef2c  | ENSMUSG00000005583 | .    | **** | **** | 1 | 0  |
| 2 | Sox11  | ENSMUSG00000063632 | **** | **** | **** | 1 | 0  |
| 2 | Hoxa2  | ENSMUSG00000014704 | .    | *    | ***  | 0 | -1 |
| 2 | Smo    | ENSMUSG00000001761 | .    | .    | **** | 0 | 0  |
| 2 | Hey1   | ENSMUSG00000040289 | **   | *    | .    | 1 | 0  |
| 2 | Fgf23  | ENSMUSG00000000182 | .    | .    | *    | 0 | -1 |
| 2 | Sfrp2  | ENSMUSG00000027996 | .    | **** | **** | 1 | 0  |
| 2 | Mir23a | ENSMUSG00000065611 | .    | *    | .    | 0 | -1 |
| 2 | Hdac7  | ENSMUSG00000022475 | .    | **** | .    | 0 | -1 |
| 2 | Prkaca | ENSMUSG00000005469 | .    | **** | .    | 0 | 0  |
| 2 | Zhx3   | ENSMUSG00000035877 | .    | **** | .    | 1 | 0  |
| 3 | Lrrc17 | ENSMUSG00000039883 | .    | *    | **** | 0 | 0  |
| 3 | Pth1r  | ENSMUSG00000032492 | *    | *    | **** | 0 | 0  |
| 3 | Chrd   | ENSMUSG00000006958 | **   | ***  | ***  | 0 | -1 |
| 3 | Bmp4   | ENSMUSG00000021835 | .    | .    | **** | 1 | 0  |
| 3 | Wnt11  | ENSMUSG00000015957 | *    | **** | **** | 0 | 0  |
| 3 | Zfp932 | ENSMUSG00000066613 | .    | .    | **** | 0 | -1 |
| 3 | Lrp3   | ENSMUSG00000001802 | *    | **   | **** | 1 | 0  |
| 3 | Sfrp1  | ENSMUSG00000031548 | **** | **** | **** | 0 | -1 |
| 3 | Gli1   | ENSMUSG00000025407 | .    | **** | ***  | 0 | 0  |
| 3 | Dhh    | ENSMUSG00000023000 | .    | .    | ***  | 0 | 0  |
| 3 | Sox8   | ENSMUSG00000024176 | *    | **   | **** | 0 | 0  |
| 3 | Il6st  | ENSMUSG00000021756 | **** | .    | .    | 1 | 0  |
| 3 | Ddr2   | ENSMUSG00000026674 | **** | .    | .    | 1 | 0  |
| 3 | Scube2 | ENSMUSG00000007279 | *    | .    | .    | 1 | 0  |
| 3 | Bmp6   | ENSMUSG00000039004 | .    | **** | ***  | 1 | 0  |
| 3 | Wnt7b  | ENSMUSG00000022382 | **** | **** | **   | 1 | 0  |

|   |               |                    |      |      |      |   |    |
|---|---------------|--------------------|------|------|------|---|----|
| 3 | Bmp2          | ENSMUSG00000027358 | **** | **** | .    | 1 | 0  |
| 3 | Axin2         | ENSMUSG00000000142 | **** | .    | **** | 0 | -1 |
| 3 | Sema4d        | ENSMUSG00000021451 | **** | .    | .    | 0 | -1 |
| 3 | Cthrc1        | ENSMUSG00000054196 | **** | **** | **** | 1 | 0  |
| 4 | Bglap3        | ENSMUSG00000074489 | .    | *    | .    | 0 | 0  |
| 4 | Adar          | ENSMUSG00000027951 | .    | **** | .    | 0 | 0  |
| 4 | Shox2         | ENSMUSG00000027833 | **** | .    | **** | 0 | 0  |
| 4 | Ifi204        | ENSMUSG00000073489 | .    | .    | **** | 1 | 0  |
| 4 | Il6           | ENSMUSG00000025746 | **** | **** | .    | 1 | 0  |
| 4 | Jund          | ENSMUSG00000071076 | .    | **** | .    | 1 | 0  |
| 4 | Cebpd         | ENSMUSG00000071637 | **** | **** | .    | 1 | 0  |
| 4 | Vegfa         | ENSMUSG00000023951 | **** | **** | .    | 1 | 0  |
| 4 | Tgfb3         | ENSMUSG00000029287 | **** | .    | .    | 0 | 0  |
| 4 | Spp1          | ENSMUSG00000029304 | **** | .    | .    | 0 | 0  |
| 4 | Fam20c        | ENSMUSG00000025854 | **** | .    | **** | 1 | 0  |
| 4 | Rassf2        | ENSMUSG00000027339 | **** | **** | **** | 0 | 0  |
| 4 | Id1           | ENSMUSG00000042745 | .    | **** | .    | 0 | -1 |
| 5 | Smad4         | ENSMUSG00000024515 | .    | **** | .    | 0 | 0  |
| 5 | Sh3pxd2b      | ENSMUSG00000040711 | .    | **** | .    | 0 | 0  |
| 5 | 2410016O06Rik | ENSMUSG00000046791 | .    | **** | .    | 0 | -1 |
| 5 | Bmpr1b        | ENSMUSG00000052430 | .    | **** | **** | 1 | 0  |
| 5 | Ahr           | ENSMUSG00000019256 | .    | **** | **** | 0 | -1 |
| 5 | Rest          | ENSMUSG00000029249 | .    | **** | .    | 0 | 0  |
| 5 | Mir133a-2     | ENSMUSG00000065460 | .    | **   | .    | 0 | -1 |
| 5 | Tnn           | ENSMUSG00000026725 | .    | **** | **** | 0 | -1 |
| 5 | Ranbp3l       | ENSMUSG00000048424 | .    | **** | .    | 0 | -1 |
| 5 | Gjal          | ENSMUSG00000050953 | .    | **** | .    | 0 | 0  |
| 5 | Areg          | ENSMUSG00000029378 | ***  | **** | .    | 0 | -1 |
| 5 | Rorb          | ENSMUSG00000036192 | .    | **** | **** | 0 | -1 |
| 5 | Epha2         | ENSMUSG00000006445 | .    | **** | .    | 0 | 0  |
| 5 | Sox2          | ENSMUSG00000074637 | .    | **** | .    | 0 | -1 |
| 5 | Twist2        | ENSMUSG00000007805 | .    | **** | **** | 0 | -1 |
| 5 | Cebpa         | ENSMUSG00000034957 | .    | **** | .    | 1 | 0  |
| 5 | Igfbp5        | ENSMUSG00000026185 | .    | **** | **** | 0 | -1 |
| 5 | Nppc          | ENSMUSG00000026241 | .    | **** | **** | 1 | 0  |
| 5 | Cited1        | ENSMUSG00000051159 | .    | **** | .    | 0 | -1 |
| 5 | Wwtr1         | ENSMUSG00000027803 | .    | **** | .    | 0 | 0  |
| 5 | Acvr2a        | ENSMUSG00000052155 | .    | .    | **** | 1 | 0  |
| 5 | Mef2d         | ENSMUSG00000001419 | .    | .    | **** | 0 | 0  |
| 5 | Fgfr1         | ENSMUSG00000031565 | **** | .    | **** | 0 | -1 |
| 5 | Acvr2b        | ENSMUSG00000061393 | .    | **   | .    | 1 | 0  |

|   |       |                    |      |      |   |   |    |
|---|-------|--------------------|------|------|---|---|----|
| 5 | Gdpd2 | ENSMUSG00000019359 | .    | **** | . | 1 | 0  |
| 5 | Fzd1  | ENSMUSG00000044674 | .    | **** | . | 0 | 0  |
| 5 | Grem1 | ENSMUSG00000074934 | **** | **** | . | 0 | -1 |

## B. Wnt pathway: clusters and significance

| Cluster assignment |           |                    | Pairwise DE significance |           |             |
|--------------------|-----------|--------------------|--------------------------|-----------|-------------|
| cluster            | gene.name | gene.id            | WTM v KOM                | WT4 v KO4 | WT14 v KO14 |
| 1                  | Apoe      | ENSMUSG00000002985 | .                        | ****      | .           |
| 1                  | Ruvbl2    | ENSMUSG00000003868 | .                        | **        | .           |
| 1                  | Tle1      | ENSMUSG00000008305 | .                        | ****      | .           |
| 1                  | Ndel1     | ENSMUSG00000018736 | .                        | ****      | .           |
| 1                  | Egfr      | ENSMUSG00000020122 | ****                     | .         | .           |
| 1                  | Nle1      | ENSMUSG00000020692 | .                        | ****      | .           |
| 1                  | Sfrp4     | ENSMUSG00000021319 | ****                     | .         | ****        |
| 1                  | Ror2      | ENSMUSG00000021464 | ****                     | ****      | ****        |
| 1                  | Nkd2      | ENSMUSG00000021567 | ****                     | ****      | ****        |
| 1                  | Fgf10     | ENSMUSG00000021732 | .                        | ****      | .           |
| 1                  | Dab2      | ENSMUSG00000022150 | ****                     | ****      | .           |
| 1                  | Myc       | ENSMUSG00000022346 | .                        | ****      | .           |
| 1                  | Csnk1e    | ENSMUSG00000022433 | .                        | ****      | .           |
| 1                  | Ddit3     | ENSMUSG00000025408 | ****                     | ****      | .           |
| 1                  | Mark1     | ENSMUSG00000026620 | .                        | ****      | ****        |
| 1                  | Wwtr1     | ENSMUSG00000027803 | .                        | ****      | .           |
| 1                  | Ppap2b    | ENSMUSG00000028517 | ****                     | .         | .           |
| 1                  | Cdk14     | ENSMUSG00000028926 | .                        | ****      | .           |
| 1                  | Fgfr2     | ENSMUSG00000030849 | ****                     | ****      | .           |
| 1                  | Ilk       | ENSMUSG00000030890 | **                       | .         | .           |
| 1                  | Zranb1    | ENSMUSG00000030967 | .                        | ****      | .           |
| 1                  | Pkd2      | ENSMUSG00000034462 | .                        | ****      | .           |
| 1                  | Prickle1  | ENSMUSG00000036158 | ****                     | ****      | ****        |
| 1                  | Lrrk2     | ENSMUSG00000036273 | .                        | ****      | ****        |
| 1                  | Siah2     | ENSMUSG00000036432 | .                        | ****      | .           |
| 1                  | Lrp1      | ENSMUSG00000040249 | ****                     | .         | .           |
| 1                  | Mdfic     | ENSMUSG00000041390 | ****                     | .         | .           |
| 1                  | Notum     | ENSMUSG00000042988 | .                        | .         | ****        |
| 1                  | Fzd1      | ENSMUSG00000044674 | .                        | ****      | .           |
| 1                  | Fzd5      | ENSMUSG00000045005 | ****                     | .         | ****        |

|   |          |                    |      |      |      |
|---|----------|--------------------|------|------|------|
| 1 | Frat2    | ENSMUSG00000047604 | .    | **** | **** |
| 1 | Foxo3    | ENSMUSG00000048756 | .    | **** | .    |
| 1 | Arntl    | ENSMUSG00000055116 | .    | **** | .    |
| 1 | Hmga2    | ENSMUSG00000056758 | **** | **** | **** |
| 1 | Csnk1g3  | ENSMUSG00000073563 | .    | **** | .    |
| 1 | Sox2     | ENSMUSG00000074637 | .    | **** | .    |
| 1 | Grem1    | ENSMUSG00000074934 | **** | **** | .    |
| 1 | Sox4     | ENSMUSG00000076431 | **** | **** | .    |
| 2 | Sox9     | ENSMUSG00000000567 | .    | **** | **** |
| 2 | Ccne1    | ENSMUSG00000002068 | **** | .    | .    |
| 2 | Tiam1    | ENSMUSG00000002489 | .    | .    | **** |
| 2 | Klf4     | ENSMUSG00000003032 | **** | .    | **** |
| 2 | Grk5     | ENSMUSG00000003228 | .    | **** | .    |
| 2 | Ndrg2    | ENSMUSG00000004558 | **** | **** | **** |
| 2 | Sulf2    | ENSMUSG00000006800 | **** | .    | .    |
| 2 | Gprc5b   | ENSMUSG00000008734 | .    | .    | **** |
| 2 | Nkx2-5   | ENSMUSG00000015579 | .    | .    | *    |
| 2 | Gata3    | ENSMUSG00000015619 | .    | .    | **** |
| 2 | Sulf1    | ENSMUSG00000016918 | **** | **** | **** |
| 2 | Rspo3    | ENSMUSG00000019880 | .    | **** | .    |
| 2 | Sdc1     | ENSMUSG00000020592 | **** | .    | .    |
| 2 | Slc9a3r1 | ENSMUSG00000020733 | .    | **** | .    |
| 2 | Scel     | ENSMUSG00000022123 | .    | .    | **** |
| 2 | Sema5a   | ENSMUSG00000022231 | **** | .    | **** |
| 2 | Cby1     | ENSMUSG00000022428 | .    | **** | .    |
| 2 | Cela1    | ENSMUSG00000023031 | .    | **** | **** |
| 2 | Jade1    | ENSMUSG00000025764 | **** | .    | **** |
| 2 | Tnn      | ENSMUSG00000026725 | .    | **** | **** |
| 2 | Tb11xr1  | ENSMUSG00000027630 | .    | .    | **** |
| 2 | Tlr2     | ENSMUSG00000027995 | .    | **** | .    |
| 2 | Vgll4    | ENSMUSG00000030315 | .    | **** | .    |
| 2 | Fam53b   | ENSMUSG00000030956 | .    | **** | .    |
| 2 | Porcn    | ENSMUSG00000031169 | .    | **** | .    |
| 2 | Sall1    | ENSMUSG00000031665 | **** | **** | **** |
| 2 | Tbx18    | ENSMUSG00000032419 | .    | **** | .    |
| 2 | Tle6     | ENSMUSG00000034758 | **** | **** | .    |
| 2 | Tle2     | ENSMUSG00000034771 | .    | **** | .    |
| 2 | Mitf     | ENSMUSG00000035158 | .    | .    | **** |
| 2 | Fzd8     | ENSMUSG00000036904 | **** | .    | .    |
| 2 | Daam2    | ENSMUSG00000040260 | **** | **** | **** |
| 2 | Fbxw4    | ENSMUSG00000040913 | **** | .    | .    |

|   |         |                    |      |      |      |
|---|---------|--------------------|------|------|------|
| 2 | Dact2   | ENSMUSG00000048826 | **** | **** | .    |
| 2 | Fzd4    | ENSMUSG00000049791 | **   | .    | .    |
| 2 | Aes     | ENSMUSG00000054452 | .    | **** | .    |
| 2 | Frat1   | ENSMUSG00000067199 | .    | *    | .    |
| 2 | Rnf213  | ENSMUSG00000070327 | .    | .    | **** |
| 2 | Foxl1   | ENSMUSG00000097084 | .    | **** | *    |
| 3 | Colla1  | ENSMUSG00000001506 | **** | **** | .    |
| 3 | Itga3   | ENSMUSG00000001507 | .    | **** | **** |
| 3 | Cav1    | ENSMUSG00000007655 | .    | **** | .    |
| 3 | Fzd3    | ENSMUSG00000007989 | .    | **** | **** |
| 3 | Rac3    | ENSMUSG00000018012 | **** | **** | .    |
| 3 | Lgr5    | ENSMUSG00000020140 | **** | .    | *    |
| 3 | Grb10   | ENSMUSG00000020176 | **** | .    | .    |
| 3 | Hnf1b   | ENSMUSG00000020679 | .    | .    | **   |
| 3 | Ccdc88c | ENSMUSG00000021182 | **   | .    | ***  |
| 3 | Depdc1b | ENSMUSG00000021697 | .    | **** | .    |
| 3 | Wnt5a   | ENSMUSG00000021994 | **** | .    | **** |
| 3 | Ctnnd2  | ENSMUSG00000022240 | .    | .    | **   |
| 3 | Wnt10b  | ENSMUSG00000022996 | .    | **** | **** |
| 3 | Ptk7    | ENSMUSG00000023972 | .    | .    | **** |
| 3 | Cdh2    | ENSMUSG00000024304 | .    | .    | **** |
| 3 | Tle4    | ENSMUSG00000024642 | **** | .    | .    |
| 3 | Wnt10a  | ENSMUSG00000026167 | .    | .    | **** |
| 3 | Tnik    | ENSMUSG00000027692 | **** | **   | *    |
| 3 | Lef1    | ENSMUSG00000027985 | .    | **** | **** |
| 3 | Sfrp2   | ENSMUSG00000027996 | .    | **** | **** |
| 3 | Reck    | ENSMUSG00000028476 | .    | **** | .    |
| 3 | Mllt3   | ENSMUSG00000028496 | .    | **** | **** |
| 3 | Wnt16   | ENSMUSG00000029671 | ***  | .    | .    |
| 3 | Tgfb1i1 | ENSMUSG00000030782 | **** | **** | .    |
| 3 | Adgra2  | ENSMUSG00000031486 | .    | .    | **** |
| 3 | Dixdc1  | ENSMUSG00000032064 | **** | **** | .    |
| 3 | Kank1   | ENSMUSG00000032702 | .    | **** | .    |
| 3 | Pkd1    | ENSMUSG00000032855 | .    | **** | .    |
| 3 | Aspm    | ENSMUSG00000033952 | .    | **** | .    |
| 3 | Rnf43   | ENSMUSG00000034177 | **** | **** | **   |
| 3 | Daam1   | ENSMUSG00000034574 | .    | .    | **** |
| 3 | Ttc21b  | ENSMUSG00000034848 | .    | **** | .    |
| 3 | Ror1    | ENSMUSG00000035305 | **   | .    | .    |
| 3 | Wnt4    | ENSMUSG00000036856 | .    | **** | **** |
| 3 | Fgf2    | ENSMUSG00000037225 | **** | **** | .    |

|   |          |                    |      |      |      |
|---|----------|--------------------|------|------|------|
| 3 | Cpe      | ENSMUSG00000037852 | .    | .    | **** |
| 3 | Ankrd6   | ENSMUSG00000040183 | .    | **   | **** |
| 3 | Fzd7     | ENSMUSG00000041075 | .    | **** | .    |
| 3 | Mgat3    | ENSMUSG00000042428 | .    | **** | **** |
| 3 | Lgr6     | ENSMUSG00000042793 | .    | **** | **   |
| 3 | Tmem64   | ENSMUSG00000043252 | **** | **** | .    |
| 3 | Lgr4     | ENSMUSG00000050199 | **** | .    | .    |
| 3 | Fzd2     | ENSMUSG00000050288 | .    | **** | .    |
| 3 | Lypd6    | ENSMUSG00000050447 | **** | **** | **** |
| 3 | Rspo2    | ENSMUSG00000051920 | **** | **** | .    |
| 3 | Epm2a    | ENSMUSG00000055493 | .    | .    | ***  |
| 3 | Thra     | ENSMUSG00000058756 | .    | **** | .    |
| 3 | Bcl9l    | ENSMUSG00000063382 | **   | **   | .    |
| 3 | Ccnd1    | ENSMUSG00000070348 | .    | **** | **** |
| 3 | Peg12    | ENSMUSG00000070526 | .    | .    | **** |
| 3 | Trabd2b  | ENSMUSG00000070867 | **** | **** | *    |
| 3 | Apcdd1   | ENSMUSG00000071847 | **** | .    | .    |
| 3 | Mcc      | ENSMUSG00000071856 | .    | **** | .    |
| 4 | Wnt9a    | ENSMUSG00000000126 | .    | .    | **** |
| 4 | Axin2    | ENSMUSG00000000142 | **** | .    | **** |
| 4 | Wnt2     | ENSMUSG00000010797 | .    | **** | .    |
| 4 | Bicc1    | ENSMUSG00000014329 | .    | **** | .    |
| 4 | Wnt11    | ENSMUSG00000015957 | *    | **** | **** |
| 4 | Celsr1   | ENSMUSG00000016028 | .    | **** | **** |
| 4 | Apc2     | ENSMUSG00000020135 | .    | .    | **** |
| 4 | Wif1     | ENSMUSG00000020218 | **** | .    | **** |
| 4 | Atp6v1c2 | ENSMUSG00000020566 | .    | .    | ***  |
| 4 | Gsc      | ENSMUSG00000021095 | .    | .    | *    |
| 4 | Barx1    | ENSMUSG00000021381 | .    | **   | **** |
| 4 | Tert     | ENSMUSG00000021611 | **** | **** | **   |
| 4 | Lats2    | ENSMUSG00000021959 | .    | **** | .    |
| 4 | Amer2    | ENSMUSG00000021986 | .    | .    | **   |
| 4 | Wnt7b    | ENSMUSG00000022382 | **** | **** | **   |
| 4 | Gli1     | ENSMUSG00000025407 | .    | **** | ***  |
| 4 | Frzb     | ENSMUSG00000027004 | .    | **** | ***  |
| 4 | Mapk8ip1 | ENSMUSG00000027223 | **** | .    | .    |
| 4 | Mdk      | ENSMUSG00000027239 | **** | **   | **** |
| 4 | Bmp2     | ENSMUSG00000027358 | **** | **** | .    |
| 4 | Pitx2    | ENSMUSG00000028023 | **** | .    | .    |
| 4 | Rspo1    | ENSMUSG00000028871 | *    | **** | **** |
| 4 | Ptpnru   | ENSMUSG00000028909 | .    | *    | .    |

|   |        |                    |      |      |      |
|---|--------|--------------------|------|------|------|
| 4 | Draxin | ENSMUSG00000029005 | .    | .    | **** |
| 4 | Wnt5b  | ENSMUSG00000030170 | **** | **** | **** |
| 4 | Dkk3   | ENSMUSG00000030772 | .    | **** | **** |
| 4 | Dkk1   | ENSMUSG00000030792 | .    | .    | **** |
| 4 | Gpc4   | ENSMUSG00000031119 | .    | **** | **** |
| 4 | Sfrp1  | ENSMUSG00000031548 | **** | **** | **** |
| 4 | Nkd1   | ENSMUSG00000031661 | **** | .    | ***  |
| 4 | Mdfi   | ENSMUSG00000032717 | ***  | **** | **** |
| 4 | Wnt6   | ENSMUSG00000033227 | **   | **** | **** |
| 4 | Vax2   | ENSMUSG00000034777 | **** | .    | **** |
| 4 | Pygo1  | ENSMUSG00000034910 | **** | **** | **** |
| 4 | Grhl3  | ENSMUSG00000037188 | .    | **   | ***  |
| 4 | Wnk2   | ENSMUSG00000037989 | **** | **** | *    |
| 4 | Egr1   | ENSMUSG00000038418 | .    | **** | **** |
| 4 | Six3   | ENSMUSG00000038805 | **** | **** | **** |
| 4 | Rbms3  | ENSMUSG00000039607 | .    | **** | .    |
| 4 | Hic1   | ENSMUSG00000043099 | .    | *    | ***  |
| 4 | Cxzc4  | ENSMUSG00000044365 | .    | **** | .    |
| 4 | Shisa2 | ENSMUSG00000044461 | **   | **** | **** |
| 4 | Dact1  | ENSMUSG00000044548 | .    | **** | .    |
| 4 | Tmem88 | ENSMUSG00000045377 | **** | **** | **** |
| 4 | Nog    | ENSMUSG00000048616 | ***  | .    | .    |
| 4 | Fzd9   | ENSMUSG00000049551 | .    | **   | .    |
| 4 | Cthrc1 | ENSMUSG00000054196 | **** | **** | **** |
| 4 | Fgfr3  | ENSMUSG00000054252 | **** | .    | **** |
| 4 | Cdh3   | ENSMUSG00000061048 | **** | **   | **** |
| 4 | Sox7   | ENSMUSG00000063060 | .    | .    | **** |
| 4 | Celsr2 | ENSMUSG00000068740 | **** | .    | **** |
| 4 | Nrarp  | ENSMUSG00000078202 | .    | .    | **** |
| 4 | Dact3  | ENSMUSG00000078794 | ***  | .    | **** |

### C. BMP pathway: clusters and significance

| Cluster assignment |           |                    | Pairwise DE significance |         |           |
|--------------------|-----------|--------------------|--------------------------|---------|-----------|
| cluster            | gene.name | gene.id            | WT_KO                    | WT4_KO4 | WT14_KO14 |
| 1                  | Itga3     | ENSMUSG00000001507 | .                        | ****    | ****      |
| 1                  | Bmp8b     | ENSMUSG00000002384 | .                        | *       | .         |
| 1                  | Cav1      | ENSMUSG00000007655 | .                        | ****    | .         |
| 1                  | Nanog     | ENSMUSG00000012396 | .                        | ***     | .         |
| 1                  | Tgfb3     | ENSMUSG00000021253 | ****                     | ****    | .         |
| 1                  | Msx2      | ENSMUSG00000021469 | ****                     | ****    | ****      |

|   |               |                    |      |      |      |
|---|---------------|--------------------|------|------|------|
| 1 | Wnt5a         | ENSMUSG00000021994 | **** | .    | **** |
| 1 | Lrp2          | ENSMUSG00000027070 | **** | **** | .    |
| 1 | Fbn1          | ENSMUSG00000027204 | .    | .    | **** |
| 1 | Bmp2          | ENSMUSG00000027358 | **** | **** | .    |
| 1 | Smad9         | ENSMUSG00000027796 | .    | **** | **** |
| 1 | Lef1          | ENSMUSG00000027985 | .    | **** | **** |
| 1 | Chrd11        | ENSMUSG00000031283 | .    | **** | **** |
| 1 | Zcchc18       | ENSMUSG00000031428 | ***  | .    | *    |
| 1 | Smpd3         | ENSMUSG00000031906 | **** | **** | .    |
| 1 | Scx           | ENSMUSG00000034161 | .    | **** | .    |
| 1 | Tgfb2         | ENSMUSG00000039239 | .    | .    | **** |
| 1 | Nog           | ENSMUSG00000048616 | ***  | .    | .    |
| 1 | Sorl1         | ENSMUSG00000049313 | .    | **** | **** |
| 1 | 9330182L06Rik | ENSMUSG00000056004 | **** | **** | **** |
| 1 | Sox11         | ENSMUSG00000063632 | **** | **** | **** |
| 2 | Gata6         | ENSMUSG00000005836 | **** | **** | .    |
| 2 | Sfrp4         | ENSMUSG00000021319 | **** | .    | **** |
| 2 | Hivep1        | ENSMUSG00000021366 | .    | .    | **** |
| 2 | Fst           | ENSMUSG00000021765 | **** | **** | **** |
| 2 | Hes1          | ENSMUSG00000022528 | **** | **** | **** |
| 2 | Fstl1         | ENSMUSG00000022816 | .    | **** | .    |
| 2 | Smad4         | ENSMUSG00000024515 | .    | **** | .    |
| 2 | Smad7         | ENSMUSG00000025880 | **** | **** | .    |
| 2 | Acvr1         | ENSMUSG00000026836 | **** | .    | .    |
| 2 | Skil          | ENSMUSG00000027660 | .    | **** | **** |
| 2 | Ilk           | ENSMUSG00000030890 | **   | .    | .    |
| 2 | Cdh5          | ENSMUSG00000031871 | .    | **** | .    |
| 2 | Neol          | ENSMUSG00000032340 | **** | .    | .    |
| 2 | Egr1          | ENSMUSG00000038418 | .    | **** | **** |
| 2 | Smurf1        | ENSMUSG00000038780 | .    | **** | .    |
| 2 | Fzd1          | ENSMUSG00000044674 | .    | **** | .    |
| 2 | Acvr2a        | ENSMUSG00000052155 | .    | .    | **** |
| 2 | Acvr2b        | ENSMUSG00000061393 | .    | **   | .    |
| 2 | Hipk2         | ENSMUSG00000061436 | **** | .    | **** |
| 2 | Kdr           | ENSMUSG00000062960 | **** | **** | .    |
| 2 | Grem1         | ENSMUSG00000074934 | **** | **** | .    |
| 3 | Htra1         | ENSMUSG00000006205 | .    | **** | **** |
| 3 | Hfe           | ENSMUSG00000006611 | ***  | .    | **** |
| 3 | Sulf1         | ENSMUSG00000016918 | **** | **** | **** |
| 3 | 4632428N05Rik | ENSMUSG00000020101 | **** | **** | .    |
| 3 | Htra3         | ENSMUSG00000029096 | **** | **** | .    |



|   |         |                    |      |      |      |
|---|---------|--------------------|------|------|------|
| 3 | Tgfr3   | ENSMUSG00000029287 | **** | .    | .    |
| 3 | Bmper   | ENSMUSG00000031963 | .    | **** | **** |
| 3 | Hoxa13  | ENSMUSG00000038203 | .    | .    | **** |
| 3 | Gdf15   | ENSMUSG00000038508 | **   | .    | .    |
| 3 | Id1     | ENSMUSG00000042745 | .    | **** | .    |
| 3 | Dand5   | ENSMUSG00000053226 | .    | **** | .    |
| 3 | Mir23a  | ENSMUSG00000065611 | .    | *    | .    |
| 3 | Rgma    | ENSMUSG00000070509 | **** | **** | **** |
| 3 | Foxd1   | ENSMUSG00000078302 | .    | .    | **** |
| 4 | Acvr1   | ENSMUSG00000000530 | .    | .    | **** |
| 4 | Chrd    | ENSMUSG00000006958 | **   | ***  | **   |
| 4 | Tmprss6 | ENSMUSG00000016942 | .    | .    | *    |
| 4 | Ror2    | ENSMUSG00000021464 | **** | **** | **** |
| 4 | Bmp4    | ENSMUSG00000021835 | .    | .    | **** |
| 4 | Rnf165  | ENSMUSG00000025427 | **   | .    | **** |
| 4 | Eng     | ENSMUSG00000026814 | **** | **** | **** |
| 4 | Sfrp2   | ENSMUSG00000027996 | .    | **** | **** |
| 4 | Sfrp1   | ENSMUSG00000031548 | **** | **** | **** |
| 4 | Comp    | ENSMUSG00000031849 | .    | .    | *    |
| 4 | Bmp6    | ENSMUSG00000039004 | .    | **** | **   |
| 4 | Nbl1    | ENSMUSG00000041120 | **** | .    | **** |
| 4 | Fam83g  | ENSMUSG00000042377 | .    | *    | **   |
| 4 | Zfp423  | ENSMUSG00000045333 | *    | .    | .    |
| 4 | Msx1    | ENSMUSG00000048450 | **** | **** | **** |
| 4 | Grem2   | ENSMUSG00000050069 | .    | **   | **   |
| 4 | Bmpr1b  | ENSMUSG00000052430 | .    | **** | **** |
| 4 | Kcp     | ENSMUSG00000059022 | .    | .    | **** |
